# Supplementary material for: Rapid synthesis of hexahydropyrrolo[3,4-b]pyrrole-fused quinolines via a consecutive [3 + 2] cycloaddition and reduction/intramolecular lactamization cascade
Source: Royal Society of Chemistry journal article supplement (doi:10.1039/d0qo00858c), 2020-01-01
Supplement: d0qo00858c1.pdf [file d0qo00858c1.pdf]

# Rapid Synthesis of Hexahydropyrrolo[3,4-b]pyrrole-Fused Quinolines via A Consecutive [3+2] Cycloaddition and Reduction/Intramolecular Lactamization Cascade

Yan-Liang Lin,<sup>a</sup> Yun-Ta Lee,<sup>a</sup> Indrajeet J. Barve<sup>a,c</sup> Yi-Ting Huang<sup>a</sup> and  
Chung-Ming Sun<sup>\*a,b</sup>

<sup>a</sup>*Department of Applied Chemistry, 1001 Ta-Hsueh Road, National Chiao-Tung  
University, Hsinchu 300-10, Taiwan, ROC*

<sup>b</sup>*Department of Medicinal and Applied Chemistry, Kaohsiung Medical University, 100,  
Shih-Chuan 1<sup>st</sup> Road, Kaohsiung 807-08, Taiwan, ROC*

<sup>c</sup>*Department of Chemistry, MES Abasaheb Garware College, Pune, India*

E-mail : cmsun@nctu.edu.tw

## Table of Contents

|                                                                               |           |
|-------------------------------------------------------------------------------|-----------|
| General Methods                                                               | S2        |
| A representative procedure for the synthesis of <b>9a</b>                     | S3-S4     |
| Characterization data of compounds <b>11a</b> , <b>11ab</b> and <b>9a-9aa</b> | S5-S21    |
| Spectral data of compounds <b>11a</b> , <b>11ab</b> and <b>9a-9aa</b>         | S22-S129  |
| X-ray crystallographic data of compound <b>6b</b>                             | S130-S141 |
| X-ray crystallographic data of compound <b>9a</b>                             | S142-S155 |

## General Methods

$^1\text{H}$  NMR (400 MHz) and  $^{13}\text{C}$  NMR (101 MHz) spectra were recorded on 400-MR automated spectrometer. Chemical shifts are reported in parts per million (ppm) on the  $\delta$  scale from an internal standard (TMS). Analytical thin-layer chromatography (TLC) was performed using 0.25 mm silica gel-coated Kieselgel 60 F<sub>254</sub> plates. Flash chromatography was performed using the indicated solvent and silica gel 60 (Merck, 230-400 mesh). High-resolution mass spectra (HRMS) were recorded in ESI mode using TOF mass spectrometer. IR spectra were recorded using a Bruker spectrophotometer. All materials were purchased from commercial sources and used without further purification.

**A representative procedure for the synthesis of 1-(3-methoxypropyl)-1H-pyrrole-2,5-dione (3b)**

To the stirred solution of 3-methoxypropylamine (200 mg, 0.0022 mmol) in acetic acid (5 mL) was added maleic anhydride (439 mg, 0.0044 mmol) and the reaction mixture was refluxed for 8 h. After completion of the reaction, solvent was evaporated under vacuum. The residue was neutralized by saturated NaHCO<sub>3</sub> solution and extracted with ethyl acetate (20 mL x 3). The combined organic layers were dried over MgSO<sub>4</sub> and concentrated *in vacuo*. The crude product was purified by flash column chromatography (15-30% ethyl acetate in hexanes) to afford 1-(3-methoxypropyl)-1H-pyrrole-2,5-dione **3b** (132 g, 60%)

**A representative procedure for the synthesis of 9a-benzyl-8-(3-methoxypropyl)-5,6a,6b,9a,10,10a-hexahydropyrrolo [3',4':4,5] pyrrolo[3,2-c]quinoline-6,7,9(8H)-trione (9a)**

A mixture of L-phenylalanine methyl ester **1b** (0.1 g, 0.55 mmol), 2-nitrobenzaldehyde **2b** (0.092 g, 0.61 mmol) and 1-(3-methoxypropyl)-1H-pyrrole-2,5-dione **3b** (0.1 g, 0.61 mmol) in the presence of AcOH (3.1  $\mu$ L, 0.05 mmol) in toluene (15 mL) was refluxed for 12 h. After completion of the reaction, solvent was evaporated under reduced pressure and the crude

product was purified by flash column chromatography (30-35% ethyl acetate in hexanes) to afford methyl 1-benzyl-5-(3-methoxypropyl)-3-(2-nitrophenyl)-4,6-dioxooctahydropyrrolo [3,4-c]pyrrole-1-carboxylate **6a** (0.241 g, 90%). To the stirred solution of methyl 1-benzyl-5-(3-methoxypropyl)-3-(2-nitrophenyl)-4,6-dioxooctahydropyrrolo[3,4-c]pyrrole-1-carboxylate **6a** (0.241 g, 0.5 mmol) in acetonitrile was added zinc (0.49 g, 7.5 mmol) and ammonium formate (0.23 g, 3.75 mmol) and the reaction was refluxed for 12 h. After completion of the reaction zinc powder was filtered through celite bed and the filtrate was evaporated under reduced pressure. Dichloromethane was added to the crude product and the precipitated ammonium formate was filtered through celite bed. Filtrate was concentrated in vacuo and the crude product was purified by flash column chromatography (30-60% ethyl acetate in hexanes) to afford 9a-benzyl-8-(3-methoxypropyl)-5,6a,6b,9a,10,10a-hexahydropyrrolo[3',4':4,5]pyrrolo[3,2-c]quinoline-6,7,9(8H)-trione **9a** (0.142 g, 68%).



## Characterization Data

### methyl 7-chloro-3-(cyclohexylcarbamoyl)-2-isopropyl-4-oxo-2,3,3a,4,5,9b-hexahydro-1H-pyrrolo[3,2-c]quinoline-2-carboxylate (11a)

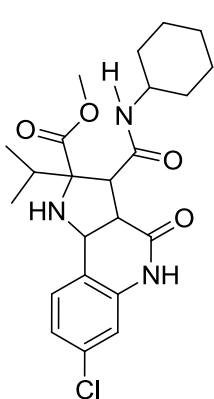

$^1\text{H}$  NMR (400 MHz,  $\text{DMSO-}d_6$ )  $\delta$  10.14 (s, 1H), 7.87 (d,  $J = 7.8$  Hz, 1H), 7.34 (d,  $J = 8.2$  Hz, 1H), 6.97 (d,  $J = 8.2$  Hz, 1H), 6.80 (s, 1H), 4.46 (s, 1H), 3.49 (s, 3H), 3.29 – 3.17 (m, 2H), 1.92 – 1.84 (m, 1H), 1.66 – 1.40 (m, 5H), 1.25 – 1.01 (m, 5H), 0.98 (d,  $J = 6.7$  Hz, 3H), 0.93 (d,  $J = 6.7$  Hz, 3H);

$^{13}\text{C}$  NMR (101 MHz,  $\text{DMSO-}d_6$ )  $\delta$  171.9, 170.3, 168.5, 138.3, 132.0, 129.9, 122.5, 122.1, 114.4, 76.0, 55.3, 55.0, 51.6, 47.5, 46.8, 32.6, 32.5, 32.4, 25.6, 24.7, 18.5, 18.0; HRMS (ESI) calcd. for  $\text{C}_{25}\text{H}_{31}\text{ClN}_3\text{O}_4$  448.2003; found 448.1998.

### Methyl 3-(tert-butylcarbamoyl)-7-chloro-2-isobutyl-4-oxo-2,3,3a,4,5,9b-hexahydro-1H-pyrrolo[3,2-c]quinoline-2-carboxylate (11ab)

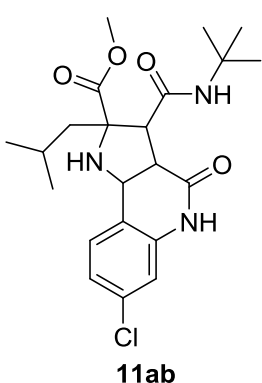

$^1\text{H}$  NMR (400 MHz,  $\text{CDCl}_3$ )  $\delta$  9.21 (s, 1H), 7.38 (d,  $J = 8.2$  Hz, 1H), 6.96 (d,  $J = 8.2$  Hz, 1H), 6.78 (s, 1H), 5.78 (s, 1H), 4.48 (s, 1H), 3.69 (s, 3H), 3.60 – 3.49 (m, 1H), 3.37 (s, 1H), 3.19 (d,  $J = 8.5$  Hz, 1H), 1.89 (tt,  $J = 12.8, 6.5$  Hz, 1H), 1.77 (dd,  $J = 14.1, 7.0$  Hz, 1H), 1.56 (dd,  $J = 14.1, 5.0$  Hz, 1H), 1.18 (s, 9H), 1.02 (d,  $J = 6.6$  Hz, 3H), 0.85 (d,  $J = 6.6$  Hz,

3H);  $^{13}\text{C}$  NMR (101 MHz,  $\text{CDCl}_3$ )  $\delta$  172.9, 170.2, 170.0, 136.3, 133.8, 130.3, 123.4, 119.8, 115.4, 73.0, 61.5, 55.6, 52.1, 51.2, 47.2, 44.2, 28.3, 24.5, 24.4, 22.8; HRMS (ESI) calcd. for  $\text{C}_{22}\text{H}_{31}\text{ClN}_3\text{O}_4$  436.2003; found 436.2009.

**9a-benzyl-8-(3-methoxypropyl)-5,6a,6b,9a,10,10a-**

**hexahydropyrrolo[3',4':4,5]pyrrolo[3,2-c]quinoline-6,7,9(8H)-trione (9a)**

$^1\text{H}$  NMR (300 MHz,  $\text{CDCl}_3$ )  $\delta$  9.13 (s, 1H), 7.37 (d,  $J = 7.5$  Hz, 1H), 7.31 – 7.18 (m, 5H), 7.14 (t,  $J = 7.5$  Hz, 1H), 7.00 (t,  $J = 7.5$  Hz, 1H), 6.78 (d,  $J = 7.8$  Hz, 1H), 4.67 (d,  $J = 7.2$  Hz, 1H), 3.53 (d,  $J = 10.2$  Hz, 1H), 3.30 (d,  $J = 13.4$  Hz, 1H), 3.22 (dd,  $J = 10.2, 7.4$  Hz, 1H), 3.16 (s, 3H), 3.05 (d,  $J = 13.4$  Hz, 1H), 2.98 – 2.79 (m, 5H), 1.14 – 0.97 (m, 2H);  $^{13}\text{C}$  NMR (75 MHz,  $\text{CDCl}_3$ )  $\delta$  179.6, 174.2, 168.4, 135.6, 134.4, 130.2, 129.4, 129.0, 127.7, 126.8, 124.0, 122.5, 116.1, 70.4, 69.7, 58.5, 58.1, 49.9, 48.0, 41.0, 35.9, 26.8.; HRMS (EI) calcd. for  $\text{C}_{24}\text{H}_{25}\text{N}_3\text{O}_4$  419.1845; found 419.1854.; IR ( $\text{cm}^{-1}$ , neat) 2923, 2856, 1700, 1205.

**9a-benzyl-8-methyl-5,6a,6b,9a,10,10a-**

**hexahydropyrrolo[3',4':4,5]pyrrolo[3,2-c]quinoline-6,7,9(8H)-trione (9b)**

$^1\text{H}$  NMR (300 MHz,  $\text{CDCl}_3$ )  $\delta$  8.63 (s, 1H), 7.36 (d,  $J = 7.5$  Hz, 1H), 7.33 – 7.19 (m, 6H), 7.13 (t,  $J = 7.5$  Hz, 1H), 7.02 (t,  $J = 7.8$  Hz, 1H), 6.75 (d,  $J = 7.5$  Hz, 1H), 4.62 (d,  $J = 6.9$  Hz, 1H), 3.47 (d,  $J = 9.9$  Hz, 1H), 3.22 (d,  $J =$

13.6 Hz, 1H), 3.11 – 3.05 (m, 2H), 2.23 (s, 3H);  $^{13}\text{C}$  NMR (75 MHz,  $\text{CDCl}_3$ )  $\delta$  179.8, 174.4, 168.2, 135.5, 134.4, 130.1, 129.4, 129.1, 127.9, 126.8, 124.0, 122.4, 116.0, 70.4, 58.1, 49.9, 48.4, 40.6, 24.4.; HRMS (EI) calcd. for  $\text{C}_{21}\text{H}_{19}\text{N}_3\text{O}_3$  361.1426; found 361.1434.; IR ( $\text{cm}^{-1}$ , neat) 3318, 1698, 1378, 757.

**9a-benzyl-8-phenyl-5,6a,6b,9a,10,10a-hexahydropyrrolo**

**[3',4':4,5]pyrrolo[3,2-c]quinoline-6,7,9(8H)-trione (9c)**

$^1\text{H}$  NMR (600 MHz, Acetone- $d_6$ )  $\delta$  9.21 (s, 1H), 7.55 (d,  $J = 7.6$  Hz, 1H), 7.42 (d,  $J = 7.4$  Hz, 2H), 7.35 (t,  $J = 7.5$  Hz, 2H), 7.30 (t,  $J = 7.2$  Hz, 1H), 7.24 – 7.18 (m, 4H), 6.97 (t,  $J = 7.5$  Hz, 1H), 6.90 (d,  $J = 7.9$  Hz, 1H), 6.26 (d,  $J = 7.3$  Hz, 2H), 4.78 (d,  $J = 7.2$  Hz, 1H), 3.68 (d,  $J = 10.1$  Hz, 1H), 3.44 (d,  $J = 13.1$  Hz, 1H), 3.30 – 3.18 (m, 2H);  $^{13}\text{C}$  NMR (75 MHz,  $\text{CDCl}_3$ )  $\delta$  178.9, 173.5, 168.4, 135.8, 134.3, 131.1, 130.1, 129.3, 128.9, 128.7, 128.6, 127.7, 127.1, 126.3, 124.1, 122.6, 116.3, 70.9, 58.2, 50.1, 48.1, 41.3.; HRMS (EI) calcd. for  $\text{C}_{26}\text{H}_{21}\text{N}_3\text{O}_3$  423.1583; found 423.1591.; IR ( $\text{cm}^{-1}$ , neat) 3322, 1708, 1679.

**9a-methyl-8-phenyl-5,6a,6b,9a,10,10a-hexahydropyrrolo [3',4':4,5] pyrrolo[3,2-*c*]quinoline-6,7,9(8*H*)-trione (9d)**

<sup>1</sup>H NMR (300 MHz, CDCl<sub>3</sub>) δ 9.10 (s, 1H), 7.44 (d, *J* = 7.1 Hz, 1H), 7.21 – 7.13 (m, 5H), 7.01 (t, *J* = 7.1 Hz, 1H), 6.80 (d, *J* = 8.1 Hz, 1H), 6.41 (d, *J* = 4.6 Hz, 2H), 4.74 (d, *J* = 7.1 Hz, 1H), 3.64 – 3.44 (m, 2H), 1.63 (s, 3H).; <sup>13</sup>C NMR (75 MHz, CDCl<sub>3</sub>) δ 179.0, 173.3, 167.6, 137.8, 135.8, 131.2, 129.6, 128.9, 128.8, 127.4, 126.3, 124.5, 122.6, 116.1, 66.2, 58.6, 53.5, 48.8, 23.0.; HRMS (EI) calcd. for C<sub>20</sub>H<sub>17</sub>N<sub>3</sub>O<sub>3</sub> 347.1270; found 347.1265.; IR (cm<sup>-1</sup>, neat) 3774, 3710, 1706, 1668.

**9a-benzyl-8-(3-phenylpropyl)-5,6a,6b,9a,10,10a-hexahydropyrrolo[3',4':4,5]pyrrolo[3,2-*c*]quinoline-6,7,9(8*H*)-trione (9e)**

<sup>1</sup>H NMR (300 MHz, CDCl<sub>3</sub>) δ 8.78 (s, 1H), 7.38 – 7.11 (m, 10H), 7.04 – 6.95 (m, 2H), 6.93 – 6.83 (m, 2H), 6.71 – 6.60 (m, 1H), 4.62 (d, *J* = 7.3 Hz, 1H), 3.50 (d, *J* = 10.2 Hz, 1H), 3.22 (d, *J* = 13.5 Hz, 1H), 3.16 (dd, *J* = 10.2, 7.3 Hz, 1H), 3.03 (d, *J* = 13.5 Hz, 1H), 2.89 – 2.76 (m, 2H), 2.28 – 2.12 (m, 2H), 1.10 – 0.96 (m, 2H).; <sup>13</sup>C NMR (75 MHz, CDCl<sub>3</sub>) δ 179.6, 174.1, 168.1, 141.1, 135.5, 134.3, 130.2, 129.5, 129.0, 128.4, 128.3, 127.8, 126.8, 126.0, 124.1, 122.5, 115.9, 70.4, 58.1, 50.0, 48.1, 41.0, 38.5, 32.8, 27.9.; HRMS

(EI) calcd. for C<sub>29</sub>H<sub>27</sub>N<sub>3</sub>O<sub>3</sub> 465.2052; found 465.2053; IR (cm<sup>-1</sup>, neat) 1693, 1595, 1396.

**8-(3-methoxypropyl)-9a-methyl-5,6a,6b,9a,10,10a-hexahydropyrrolo[3',4':4,5]pyrrolo[3,2-c]quinoline-6,7,9(8H)-trione (9f)**

<sup>1</sup>H NMR (300 MHz, CDCl<sub>3</sub>) δ 9.27 (s, 1H), 7.35 (d, *J* = 7.6 Hz, 1H), 7.12 (t, *J* = 7.5 Hz, 1H), 6.96 (t, *J* = 7.5 Hz, 1H), 6.81 (d, *J* = 7.7 Hz, 1H), 4.71 (d, *J* = 7.3 Hz, 1H), 3.50 (dd, *J* = 10.1, 7.5 Hz, 1H), 3.34 (d, *J* = 10.2 Hz, 1H), 3.17 (s, 1H), 3.09 (t, *J* = 5.9 Hz, 1H), 2.99 (t, *J* = 7.4 Hz, 1H), 1.55 (s, 1H), 1.08 (dq, *J* = 12.5, 6.1 Hz, 1H); <sup>13</sup>C NMR (75 MHz, CDCl<sub>3</sub>) δ 179.9, 174.3, 168.6, 135.8, 129.3, 127.1, 124.0, 122.5, 116.1, 70.1, 66.3, 58.6, 58.5, 53.5, 48.5, 36.4, 26.8, 22.5; HRMS (EI) calcd. for C<sub>18</sub>H<sub>21</sub>N<sub>3</sub>O<sub>4</sub> 343.1532; found 343.1523; IR (cm<sup>-1</sup>, neat) 3324, 1698, 1396, 759.

**8,9a-dimethyl-5,6a,6b,9a,10,10a-hexahydropyrrolo[3',4':4,5]pyrrolo[3,2-c]quinoline-6,7,9(8H)-trione (9g)**

<sup>1</sup>H NMR (300 MHz, CD<sub>3</sub>CN) δ 8.27 (s, 1H), 7.34 (d, *J* = 7.7 Hz, 1H), 7.15 – 7.07 (m, 1H), 6.93 (td, *J* = 7.5, 1.1 Hz, 1H), 6.72 (d, *J* = 7.9 Hz, 1H), 4.61 (d, *J* = 6.7 Hz, 1H), 3.31 – 3.15 (m, 2H), 2.19 (s, 3H), 1.44 (s, 3H); <sup>13</sup>C NMR (75 MHz, CD<sub>3</sub>CN) δ 180.6, 175.8, 168.5, 17.45, 129.7, 128.0, 124.2, 123.8,

115.9, 67.6, 59.6, 54.1, 49.8, 24.4, 21.6; HRMS (EI) calcd. for C<sub>15</sub>H<sub>15</sub>N<sub>3</sub>O<sub>3</sub> 285.1113; found; 285.1113; IR (cm<sup>-1</sup>, neat) 3318, 1697, 1380, 757.

**9a-benzyl-8-(2-methylpropyl)-5,6a,6b,9a,10,10a-hexahydropyrrolo[3',4':4,5]pyrrolo[3,2-c]quinoline-6,7,9(8H)-trione (9h)**

<sup>1</sup>H NMR (400 MHz, CDCl<sub>3</sub>) δ 7.64 (s, 1H), 7.34 (d, *J* = 7.7 Hz, 1H), 7.35-7.23 (m, 3H), 7.20 (d, *J* = 7.7 Hz, 2H), 7.14 (t, *J* = 7.6 Hz, 1H), 7.01 (t, *J* = 7.4 Hz, 1H), 6.64 (d, *J* = 7.9 Hz, 1H), 4.64 (d, *J* = 7.1 Hz, 1H), 3.51 (d, *J* = 10.0 Hz, 1H), 3.30 (d, *J* = 13.4 Hz, 1H), 3.22 (dd, *J* = 10.0, 7.2 Hz, 1H), 3.00 (d, *J* = 13.5 Hz, 1H), 2.52 (dd, *J* = 13.1, 6.5 Hz, 1H), 2.40 (dd, *J* = 13.0, 8.1 Hz, 1H), 1.51 – 1.39 (m, 1H), 0.52 (d, *J* = 6.7 Hz, 3H), 0.34 (d, *J* = 6.7 Hz, 3H); <sup>13</sup>C NMR (101 MHz, CDCl<sub>3</sub>) δ 179.4, 174.3, 167.3, 135.1, 134.1, 130.1, 129.3, 128.8, 127.6, 126.6, 123.9, 122.3, 115.4, 70.0, 57.7, 49.4, 47.8, 45.6, 41.2, 26.7, 19.9, 19.7; HRMS (EI) calcd. for C<sub>24</sub>H<sub>25</sub>N<sub>3</sub>O<sub>3</sub> 403.1896; found 403.1893; IR (cm<sup>-1</sup>, neat) 3320, 1698, 1394, 757.

**9a-methyl-8-(2-methylpropyl)-5,6a,6b,9a,10,10a-hexahydropyrrolo[3',4':4,5]pyrrolo[3,2-c]quinoline-6,7,9(8H)-trione (9i)**

<sup>1</sup>H NMR (300 MHz, CDCl<sub>3</sub>) δ 9.10 (s, 1H), 7.34 (d, *J* = 7.5 Hz, 1H), 7.13 (t, *J* = 7.5 Hz, 1H), 6.97 (t, *J* = 7.5 Hz, 1H), 6.81 (d, *J* = 7.8 Hz, 1H), 4.71 (d, *J* = 7.0 Hz, 1H), 3.58 – 3.40 (m, 1H), 3.34 (d, *J* = 10.0 Hz, 1H), 2.61 (d, *J* =

7.0 Hz, 2H), 1.70 – 1.51 (m, 1H), 1.56 (s, 3H), 0.64 (d,  $J = 3.7$  Hz, 3H), 0.62 (d,  $J = 3.7$  Hz, 3H);  $^{13}\text{C}$  NMR (75 MHz,  $\text{CDCl}_3$ )  $\delta$  180.3, 174.7, 168.5, 135.7, 129.4, 127.0, 124.0, 122.3, 116.1, 66.0, 58.5, 53.2, 48.4, 45.7, 27.0, 22.8, 20.3, 20.1.; HRMS (EI) calcd. for  $\text{C}_{18}\text{H}_{21}\text{N}_3\text{O}_3$  327.1583; found 327.1579.; IR ( $\text{cm}^{-1}$ , neat) 3322, 1698, 1363, 757.

**9a-benzyl-8-pentyl-5,6a,6b,9a,10,10a-**

**hexahydropyrrolo[3',4':4,5]pyrrolo[3,2-c]quinoline-6,7,9(8H)-trione (9j)**

$^1\text{H}$  NMR (300 MHz,  $\text{CDCl}_3$ );  $\delta$  8.34 (s, 1H), 7.35 (d,  $J = 7.5$  Hz, 1H), 7.32 – 7.18 (m, 5H), 7.13 (t,  $J = 7.5$  Hz, 1H), 7.00 (t,  $J = 7.5$  Hz, 1H), 6.69 (d,  $J = 7.7$  Hz, 1H), 4.65 (d,  $J = 7.3$  Hz, 1H), 3.50 (d,  $J = 10.1$  Hz, 1H), 3.27 (d,  $J = 13.4$  Hz, 1H), 3.17 (dd,  $J = 10.1, 7.3$  Hz, 1H), 3.02 (d,  $J = 13.4$  Hz, 1H), 2.81 – 2.66 (m, 2H), 1.17 – 1.01 (m, 2H), 0.92 – 0.63 (m, 4H), 0.75 (t,  $J = 7.3$  Hz, 3H);  $^{13}\text{C}$  NMR (75 MHz,  $\text{CDCl}_3$ )  $\delta$  179.5, 174.1, 167.9, 135.5, 134.4, 130.2, 129.5, 129.0, 127.8, 126.9, 124.1, 122.6, 115.8, 70.3, 58.1, 49.9, 48.1, 41.1, 38.8, 28.8, 26.3, 22.3, 14.0; HRMS (EI) calcd. for  $\text{C}_{25}\text{H}_{27}\text{N}_3\text{O}_3$  417.2052; found 417.2050; IR ( $\text{cm}^{-1}$ , neat) 3336, 1697, 1398, 759.

**9a-methyl-8-pentyl-5,6a,6b,9a,10,10a-**

**hexahydropyrrolo[3',4':4,5]pyrrolo[3,2-c]quinoline-6,7,9(8H)-trione (9k)**

<sup>1</sup>H NMR (300 MHz, CDCl<sub>3</sub>) δ 9.04 (s, 1H), 7.35 (d, *J* = 7.5 Hz, 1H), 7.12 (t, *J* = 7.5 Hz, 1H), 6.97 (t, *J* = 7.5 Hz, 1H), 6.79 (d, *J* = 7.8 Hz, 1H), 4.71 (d, *J* = 7.4 Hz, 1H), 3.49 (dd, *J* = 10.2, 7.4 Hz, 1H), 3.33 (d, *J* = 10.2 Hz, 1H), 2.93 – 2.82 (m, 2H), 1.56 (s, 3H), 1.20 – 1.06 (m, 2H), 1.06 – 0.91 (m, 2H), 0.78 (t, *J* = 7.2 Hz, 3H), 0.83 – 0.68 (m, 2H); <sup>13</sup>C NMR (75 MHz, CDCl<sub>3</sub>) δ 179.9, 174.3, 168.6, 135.8, 129.4, 127.0, 124.0, 122.5, 116.1, 66.2, 58.6, 53.4, 48.4, 38.9, 28.9, 26.2, 22.6, 22.3, 14.0; HRMS (EI) calcd. for C<sub>19</sub>H<sub>23</sub>N<sub>3</sub>O<sub>3</sub> 341.1739; found 341.1734.; IR (cm<sup>-1</sup>, neat) 2933, 1700, 1367, 759.

**9a-methyl-8-phenyl-6b,9a,10,10a-tetrahydro-6H-chromeno[4,3-**

**b]pyrrolo[3,4-d]pyrrole-6,7,9(6aH,8H)-trione (9l)**

<sup>1</sup>H NMR (300 MHz, CDCl<sub>3</sub>) δ 7.49 (d, *J* = 6.5 Hz, 1H), 7.40 – 7.23 (m, 4H), 7.18 (d, *J* = 6.5 Hz, 1H), 7.06 (d, *J* = 7.5 Hz, 1H), 6.50 (s, 2H), 4.80 (d, *J* = 5.8 Hz, 1H), 3.75 (t, *J* = 8.2 Hz, 1H), 3.52 (d, *J* = 9.6 Hz, 1H), 1.68 (s, 3H); <sup>13</sup>C NMR (75 MHz, CDCl<sub>3</sub>) δ 178.4, 173.0, 165.1, 150.2, 130.9, 130.6, 128.9, 128.9, 127.5, 126.1, 125.8, 121.7, 117.7, 66.1, 57.3, 53.7, 47.0, 23.0;



HRMS (EI) calcd. for C<sub>20</sub>H<sub>16</sub>N<sub>2</sub>O<sub>4</sub> 348.1110; found 348.1100; IR (cm<sup>-1</sup>, neat) 3334, 1760, 1710.

**9a-benzyl-8-[2-(cyclohex-1-en-1-yl)ethyl]-5,6a,6b,9a,10,10a-hexahydropyrrolo[3',4':4,5]pyrrolo[3,2-c]quinoline-6,7,9(8H)-trione (9m)**

<sup>1</sup>H NMR (300 MHz, CDCl<sub>3</sub>) δ 8.25 (s, 1H), 7.36 (d, *J* = 7.5 Hz, 1H), 7.33 – 7.19 (m, 5H), 7.15 (t, *J* = 7.5 Hz, 1H), 7.00 (t, *J* = 7.5 Hz, 1H), 6.69 (d, *J* = 7.8 Hz, 1H), 5.07 (s, 1H), 4.62 (d, *J* = 7.2 Hz, 1H), 3.47 (d, *J* = 10.1 Hz, 1H), 3.25 – 3.01 (m, 3H), 2.94 – 2.79 (m, 2H), 1.95 – 1.63 (m, 5H), 1.58 – 1.32 (m, 5H); <sup>13</sup>C NMR (101 MHz, CDCl<sub>3</sub>) δ 179.2, 173.7, 167.7, 135.3, 135.1, 134.2, 133.9, 130.1, 129.3, 128.9, 127.6, 126.7, 125.0, 123.9, 122.8, 122.4, 115.7, 70.0, 57.9, 49.8, 48.0, 40.7, 37.0, 34.3, 27.9, 25.1, 22.6, 22.1; HRMS (EI) calcd. for C<sub>28</sub>H<sub>29</sub>N<sub>3</sub>O<sub>3</sub> 455.2209; found 455.2213; IR (cm<sup>-1</sup>, neat) 2917, 1693, 755.

**8-(3,3-diphenylpropyl)-9a-methyl-5,6a,6b,9a,10,10a-hexahydropyrrolo[3',4':4,5]pyrrolo[3,2-c]quinoline-6,7,9(8H)-trione (9n)**

<sup>1</sup>H NMR (300 MHz, CDCl<sub>3</sub>) δ 9.18 (s, 1H), 7.34 (d, *J* = 7.6 Hz, 1H), 7.30 – 7.05 (m, 10H), 6.88 – 6.73 (m, 1H), 6.73 – 6.61 (m, 1H), 4.67 (d, *J* = 7.4 Hz, 1H), 3.67 (t, *J* = 7.8 Hz, 1H), 3.48 (dd, *J* = 10.2, 7.5 Hz, 1H), 3.25 (d, *J* = 10.2 Hz, 1H), 2.98 – 2.93 (m, 2H), 1.47 (s, 3H), 1.44 – 1.30 (m, 2H); <sup>13</sup>C

NMR (75 MHz, CDCl<sub>3</sub>)  $\delta$  179.6, 174.1, 168.4, 143.8, 143.7, 135.6, 129.7, 128.5, 128.5, 127.8, 127.8, 127.0, 126.5, 126.4, 124.1, 122.2, 116.0, 66.3, 58.6, 53.4, 49.2, 48.3, 38.1, 31.6, 22.5; HRMS (EI) calcd. for C<sub>29</sub>H<sub>27</sub>N<sub>3</sub>O<sub>3</sub> 469.2052; found 469.2048; IR (cm<sup>-1</sup>, neat) 2927, 1693, 1365, 698.

**8-(4-methoxybenzyl)-9a-methyl-5,6a,6b,9a,10,10a-hexahydropyrrolo[3',4':4,5]pyrrolo[3,2-c]quinoline-6,7,9(8H)-trione (9o)**

<sup>1</sup>H NMR (300 MHz, CDCl<sub>3</sub>)  $\delta$  8.96 (s, 1H), 7.33 (d, *J* = 7.6 Hz, 1H), 7.17 – 7.00 (m, 3H), 6.93 (t, *J* = 7.6 Hz, 1H), 6.76 (d, *J* = 7.8 Hz, 1H), 6.69 (d, *J* = 8.6 Hz, 2H), 4.70 (d, *J* = 7.2 Hz, 1H), 3.98 – 3.79 (m, 2H), 3.73 (s, 3H), 3.48 (dd, *J* = 10.1, 7.2 Hz, 1H), 3.31 (d, *J* = 10.1 Hz, 1H), 1.52 (s, 3H); <sup>13</sup>C NMR (75 MHz, CDCl<sub>3</sub>)  $\delta$  179.6, 174.2, 168.3, 159.2, 135.6, 130.3, 129.4, 127.3, 126.8, 124.0, 122.3, 116.0, 114.0, 66.2, 58.5, 55.3, 53.3, 48.5, 41.7, 22.5; HRMS (EI) calcd. for C<sub>22</sub>H<sub>21</sub>N<sub>3</sub>O<sub>4</sub> 391.1532; found 391.1541; IR (cm<sup>-1</sup>, neat) 2919, 1695, 757.

**9a-methyl-8-(thiophen-2-ylmethyl)-5,6a,6b,9a,10,10a-hexahydropyrrolo[3',4':4,5]pyrrolo[3,2-c]quinoline-6,7,9(8H)-trione (9p)**

<sup>1</sup>H NMR (300 MHz, CDCl<sub>3</sub>)  $\delta$  8.87 (s, 1H), 7.34 (d, *J* = 7.6 Hz, 1H), 7.16 – 7.04 (m, 2H), 6.93 (td, *J* = 7.6, 0.9 Hz, 1H), 6.80 (d, *J* = 3.5 Hz, 2H), 6.76 (dd, *J* = 7.8, 0.9 Hz, 1H), 4.72 (d, *J* = 7.1 Hz, 1H), 4.15 – 4.06 (m, 2H), 3.49

(dd,  $J = 10.1, 7.1$  Hz, 1H), 3.33 (d,  $J = 10.1$  Hz, 1H), 1.54 (s, 3H);  $^{13}\text{C}$  NMR (75 MHz,  $\text{CDCl}_3$ )  $\delta$  179.1, 173.8, 168.2, 136.4, 135.6, 129.4, 128.1, 126.9, 126.9, 126.1, 124.0, 122.2, 116.0, 66.4, 58.6, 53.4, 48.6, 36.3, 22.4; HRMS (EI) calcd. for  $\text{C}_{19}\text{H}_{17}\text{N}_3\text{O}_3\text{S}$  367.0991; found 367.0998; IR ( $\text{cm}^{-1}$ , neat) 1700, 1390, 757.

**9a-methyl-8-(3-phenylpropyl)-5,6a,6b,9a,10,10a-hexahydropyrrolo[3',4':4,5]pyrrolo[3,2-c]quinoline-6,7,9(8H)-trione (9q)**

$^1\text{H}$  NMR (300 MHz,  $\text{CDCl}_3$ )  $\delta$  9.45 (s, 1H), 7.37 – 7.29 (m, 1H), 7.24 – 7.11 (m, 4H), 7.02 (d,  $J = 8.0$  Hz, 1H), 6.84 (dd,  $J = 5.5, 3.5$  Hz, 2H), 6.80 – 6.71 (m, 1H), 4.67 (d,  $J = 7.4$  Hz, 1H), 3.50 (dd,  $J = 10.1, 7.4$  Hz, 1H), 3.32 (d,  $J = 10.1$  Hz, 1H), 2.96 (t,  $J = 7.8$  Hz, 2H), 2.33 (t,  $J = 7.8$  Hz, 2H), 1.52 (s, 3H), 1.16 – 0.97 (m, 2H);  $^{13}\text{C}$  NMR (75 MHz,  $\text{CDCl}_3$ )  $\delta$  179.8, 174.2, 168.6, 141.0, 135.7, 129.4, 128.3, 128.3, 127.0, 126.0, 124.0, 122.4, 116.1, 66.2, 58.5, 53.4, 48.4, 38.6, 33.0, 27.9, 22.5; HRMS (EI) calcd. for  $\text{C}_{23}\text{H}_{23}\text{N}_3\text{O}_3$  389.1739; found 389.1739; IR ( $\text{cm}^{-1}$ , neat) 3322, 2927, 1698, 1708, 759.

**8-[2-(cyclohex-1-en-1-yl)ethyl]-9a-methyl-5,6a,6b,9a,10,10a-hexahydropyrrolo[3',4':4,5]pyrrolo[3,2-c]quinoline-6,7,9(8H)-trione (9r)**

$^1\text{H}$  NMR (300 MHz,  $\text{CDCl}_3$ )  $\delta$  9.19 (s, 1H), 7.35 (d,  $J = 7.6$  Hz, 1H), 7.12 (t,  $J = 7.6$  Hz, 1H), 6.97 (t,  $J = 7.6$  Hz, 1H), 6.81 (d,  $J = 7.9$  Hz, 1H), 5.15 (s,

1H), 4.71 (d,  $J = 7.2$  Hz, 1H), 3.49 (dd,  $J = 10.2, 7.2$  Hz, 1H), 3.31 (d,  $J = 10.2$  Hz, 1H), 2.94 (t,  $J = 7.6$  Hz, 2H), 1.84 – 1.74 (m, 4H), 1.53 (s, 3H), 1.52 – 1.37 (m, 6H);  $^{13}\text{C}$  NMR (75 MHz,  $\text{CDCl}_3$ )  $\delta$  179.9, 174.2, 168.6, 135.8, 134.2, 129.4, 127.0, 124.0, 123.1, 122.5, 116.1, 66.2, 58.6, 53.3, 48.5, 37.0, 34.4, 28.0, 25.2, 22.8, 22.7, 22.2; HRMS (EI) calcd. for  $\text{C}_{22}\text{H}_{25}\text{N}_3\text{O}_3$  379.1896; found 379.1899; IR ( $\text{cm}^{-1}$ , neat) 3318, 3058, 1695.

**9a-benzyl-8-(3-methylbutyl)-5,6a,6b,9a,10,10a-**

**hexahydropyrrolo[3',4':4,5]pyrrolo[3,2-*c*]quinoline-6,7,9(8*H*)-trione (9s)**

$^1\text{H}$  NMR (300 MHz,  $\text{CDCl}_3$ )  $\delta$  9.29 (s, 1H), 7.35 (d,  $J = 7.5$  Hz, 1H), 7.27 – 7.15 (m, 5H), 7.10 (t,  $J = 7.5$  Hz, 1H), 6.97 (t,  $J = 7.5$  Hz, 1H), 6.78 (d,  $J = 7.8$  Hz, 1H), 4.65 (d,  $J = 7.4$  Hz, 1H), 3.52 (d,  $J = 10.2$  Hz, 1H), 3.28 (d,  $J = 13.5$  Hz, 1H), 3.22 (dd,  $J = 10.2, 7.4$  Hz, 1H), 3.02 (d,  $J = 13.5$  Hz, 1H), 2.76 (t,  $J = 7.9$  Hz, 2H), 1.16 – 0.95 (m, 1H), 0.67 (d,  $J = 6.2$  Hz, 3H), 0.65 (d,  $J = 6.2$  Hz, 3H), 0.62 – 0.45 (m, 2H);  $^{13}\text{C}$  NMR (75 MHz,  $\text{CDCl}_3$ )  $\delta$  179.6, 174.1, 168.5, 135.6, 134.4, 130.2, 129.4, 128.9, 127.7, 126.8, 124.1, 122.6, 116.1, 70.4, 58.0, 49.9, 47.9, 41.1, 37.2, 34.9, 25.7, 22.3, 22.2; HRMS (EI) calcd. for  $\text{C}_{25}\text{H}_{27}\text{N}_3\text{O}_3$  417.2052; found 417.2050; IR ( $\text{cm}^{-1}$ , neat) 3315, 2954, 1691, 1365.

**9a-benzyl-8-(2-methoxyethyl)-5,6a,6b,9a,10,10a-**

**hexahydropyrrolo[3',4':4,5]pyrrolo[3,2-c]quinoline-6,7,9(8H)-trione (9t)**

<sup>1</sup>H NMR (300 MHz, CDCl<sub>3</sub>) δ 8.89 (s, 1H), 7.35 (d, *J* = 7.6 Hz, 1H), 7.32 – 7.23 (m, 3H), 7.23 – 7.18 (m, 2H), 7.14 (t, *J* = 7.6 Hz, 1H), 7.00 (t, *J* = 7.6 Hz, 1H), 6.76 (d, *J* = 7.8 Hz, 1H), 4.63 (d, *J* = 7.2 Hz, 1H), 3.50 (d, *J* = 10.1 Hz, 1H), 3.25 (d, *J* = 13.6 Hz, 1H), 3.19 – 3.05 (m, 2H), 3.09 (s, 3H), 3.06 – 2.84 (m, 2H), 2.77 (t, *J* = 6.6 Hz, 2H); <sup>13</sup>C NMR (75 MHz, CDCl<sub>3</sub>) δ 179.6, 174.1, 168.2, 135.7, 134.4, 130.2, 129.4, 129.0, 127.8, 126.9, 124.0, 122.5, 116.1, 70.3, 67.7, 58.6, 58.1, 49.9, 48.2, 40.9, 37.6; HRMS (EI) calcd. for C<sub>23</sub>H<sub>23</sub>N<sub>3</sub>O<sub>4</sub> 405.1689; found 405.1685; IR (cm<sup>-1</sup>, neat) 3320, 1687, 1342.

**9a-benzyl-2,3-dimethoxy-8-(3-methoxypropyl)-5,6a,6b,9a,10,10a-**

**hexahydropyrrolo[3',4':4,5]pyrrolo[3,2-c]quinoline-6,7,9(8H)-trione (9u)**

<sup>1</sup>H NMR (400 MHz, CDCl<sub>3</sub>) δ 8.96 (s, 1H), 7.25-7.17 (m, 5H), 6.91 (s, 1H), 6.32 (s, 1H), 4.60 (d, *J* = 6.8 Hz, 1H), 3.84 (s, 3H), 3.76 (s, 3H), 3.50 (d, *J* = 10.2 Hz, 1H), 3.29 (d, *J* = 13.3 Hz, 1H), 3.03 (d, *J* = 13.4 Hz, 1H), 2.93 – 2.81 (m, 5H), 1.14 – 0.99 (m, 2H); <sup>13</sup>C NMR (101 MHz, CDCl<sub>3</sub>) δ 179.3, 173.9, 168.2, 149.6, 145.5, 134.1, 129.9, 128.9, 128.8, 127.7, 113.4, 109.7, 100.2, 70.7, 69.4, 58.3, 58.2, 56.3, 56.0, 48.7, 40.7, 35.8, 27.0; HRMS (ESI) calcd. for C<sub>26</sub>H<sub>30</sub>N<sub>3</sub>O<sub>6</sub> 480.2135; found 480.2138.

**9a-((1H-indol-3-yl)methyl)-3-chloro-8-cyclohexyl-5,6a,6b,9a,10,10a-hexahydropyrrolo[3',4':4,5]pyrrolo[3,2-c]quinoline-6,7,9(8H)-trione (9v)**

<sup>1</sup>H NMR (400 MHz, CDCl<sub>3</sub>) δ 8.71 (s, 1H), 8.42 (s, 1H), 7.64 (d, *J* = 7.7 Hz, 1H), 7.35 (t, *J* = 7.4 Hz, 2H), 7.24 – 7.07 (m, 3H), 6.96 (d, *J* = 8.1 Hz, 1H), 6.73 (s, 1H), 4.52 (d, *J* = 7.1 Hz, 1H), 3.53 (d, *J* = 10.4 Hz, 1H), 3.46 – 3.33 (m, 2H), 3.29 (d, *J* = 14.5 Hz, 1H), 3.19 – 3.08 (m, 1H), 1.63 – 1.37 (m, 5H), 1.10 – 0.92 (m, 3H), 0.52 (d, *J* = 11.7 Hz, 2H); <sup>13</sup>C NMR (101 MHz, CDCl<sub>3</sub>) δ 179.7, 174.2, 168.2, 136.7, 135.9, 134.8, 128.8, 127.5, 123.9, 123.7, 122.5, 121.0, 120.2, 118.5, 115.6, 111.4, 108.2, 70.5, 58.0, 51.7, 51.0, 48.3, 30.6, 27.6, 27.3, 25.5, 24.7; HRMS (ESI) calcd. for C<sub>28</sub>H<sub>28</sub>ClN<sub>4</sub>O<sub>3</sub> 503.1850; found 503.1850.

**8-cycloheptyl-2,3-dimethoxy-9a-(2-(methylthio)ethyl)-5,6a,6b,9a,10,10a-hexahydropyrrolo[3',4':4,5]pyrrolo[3,2-c]quinoline-6,7,9(8H)-trione (9w)**

<sup>1</sup>H NMR (400 MHz, CDCl<sub>3</sub>) δ 8.62 (s, 1H), 6.84 (s, 1H), 6.34 (s, 1H), 4.66 (d, *J* = 6.2 Hz, 1H), 3.83 (s, 3H), 3.80 (s, 3H), 3.71 – 3.58 (m, 1H), 3.50 – 3.39 (m, 1H), 2.14 – 2.00 (m, 4H), 1.66 – 1.50 (m, 5H), 1.49 – 1.34 (m, 5H), 1.25 (s, 3H), 1.23 – 1.12 (m, 1H), 0.93 – 0.82 (m, 2H); <sup>13</sup>C NMR (101 MHz, CDCl<sub>3</sub>) δ 179.0, 173.6, 168.1, 150.0, 145.8, 128.9, 113.5, 109.7, 100.3, 68.8,

57.6, 56.4, 56.1, 53.5, 50.6, 48.6, 34.6, 30.9, 30.5, 29.2, 28.6, 27.4, 25.3, 25.2, 15.6; HRMS (ESI) calcd. for C<sub>25</sub>H<sub>34</sub>N<sub>3</sub>O<sub>5</sub>S 488.2219; found 488.2222.

**8-(2-(cyclohex-1-en-1-yl)ethyl)-9a-(4-hydroxybenzyl)-5,6a,6b,9a,10,10a-hexahydropyrrolo[3',4':4,5]pyrrolo[3,2-c]quinoline-6,7,9(8H)-trione (9x)**

<sup>1</sup>H NMR (400 MHz, Acetone-*d*<sub>6</sub>) δ 9.12 (s, 1H), 8.31 (s, 1H), 7.44 (d, *J* = 7.6 Hz, 1H), 7.16 (d, *J* = 8.3 Hz, 2H), 7.11 (d, *J* = 7.5 Hz, 1H), 6.92 (t, *J* = 7.5 Hz, 1H), 6.82 (d, *J* = 7.9 Hz, 1H), 6.77 (d, *J* = 8.3 Hz, 2H), 5.06 (s, 1H), 4.66 (d, *J* = 7.2 Hz, 1H), 3.48 – 3.42 (m, 1H), 3.17 (d, *J* = 13.5 Hz, 1H), 3.05 (dd, *J* = 10.0, 7.4 Hz, 1H), 3.00 (d, *J* = 13.4 Hz, 1H), 2.78 (t, *J* = 7.8 Hz, 2H), 1.84 (s, 2H), 1.74 (s, 2H), 1.53-1.41 (m, 4H), 1.37-1.29 (m, 2H), 0.89 (t, *J* = 7.3 Hz, 1H); HRMS (ESI) calcd. for C<sub>28</sub>H<sub>30</sub>N<sub>3</sub>O<sub>4</sub> 472.2236; found 472.2243.

**9a-isobutyl-2-methoxy-8-propyl-5,6a,6b,9a,10,10a-hexahydropyrrolo[3',4':4,5]pyrrolo[3,2-c]quinoline-6,7,9(8H)-trione (9y)**

<sup>1</sup>H NMR (400 MHz, CDCl<sub>3</sub>) δ 7.70 (s, 1H), 6.93 (s, 1H), 6.71 (dd, *J* = 8.6, 2.4 Hz, 1H), 6.60 (d, *J* = 8.7 Hz, 1H), 4.67 (d, *J* = 7.0 Hz, 1H), 3.76 (s, 3H), 3.49 – 3.33 (m, 2H), 2.95 – 2.75 (m, 2H), 1.95 (dd, *J* = 13.7, 6.0 Hz, 1H), 1.78 – 1.61 (m, 3H), 0.96 (d, *J* = 6.4 Hz, 3H), 0.92 (d, *J* = 6.4 Hz, 3H), 0.69 (t, *J* = 7.4 Hz, 3H); <sup>13</sup>C NMR (101 MHz, CDCl<sub>3</sub>) δ 179.7, 174.4, 167.6, 156.3, 128.7, 123.6, 116.9, 115.8, 111.1, 69.5, 57.6, 55.7, 50.8, 48.6, 43.9,

40.2, 24.9, 24.2, 23.8, 20.0, 11.1; HRMS (ESI) calcd. for C<sub>21</sub>H<sub>28</sub>N<sub>3</sub>O<sub>4</sub> 386.2080; found 386.2083.

**2-methoxy-8-methyl-9a-phenyl-5,6a,6b,9a,10,10a-hexahydropyrrolo[3',4':4,5]pyrrolo[3,2-c]quinoline-6,7,9(8H)-trione (9z)**

<sup>1</sup>H NMR (400 MHz, CDCl<sub>3</sub>) δ 8.38 (s, 1H), 7.48 (d, *J* = 7.2 Hz, 2H), 7.41-7.32 (m, 3H), 6.95 (s, 1H), 6.72 (s, 2H), 4.86 (d, *J* = 7.0 Hz, 1H), 3.79 (s, 3H), 3.68 (d, *J* = 10.1 Hz, 1H), 3.54 (dd, *J* = 10.1, 7.1 Hz, 1H), 2.43 (s, 3H); <sup>13</sup>C NMR (101 MHz, CDCl<sub>3</sub>) δ 178.7, 174.1, 167.2, 156.2, 138.5, 129.0, 128.6, 125.5, 123.1, 117.1, 115.9, 110.9, 71.8, 58.3, 55.8, 54.7, 48.3, 24.7; HRMS (ESI) calcd. for C<sub>21</sub>H<sub>20</sub>N<sub>3</sub>O<sub>4</sub> 378.1454; found 378.1454.

**9a-isopropyl-2-methoxy-8-propyl-5,6a,6b,9a,10,10a-hexahydropyrrolo[3',4':4,5]pyrrolo[3,2-c]quinoline-6,7,9(8H)-trione (9aa)**

<sup>1</sup>H NMR (400 MHz, CDCl<sub>3</sub>) δ 8.26 (s, 1H), 6.86 (s, 1H), 6.68 (q, *J* = 8.7 Hz, 2H), 4.69 (d, *J* = 6.2 Hz, 1H), 3.76 (s, 3H), 3.29 (q, *J* = 10.1 Hz, 2H), 2.92 – 2.72 (m, 2H), 2.24 (dt, *J* = 13.6, 6.9 Hz, 1H), 1.05 (d, *J* = 6.8 Hz, 3H), 1.0-0.93 (m, 2H), 0.90 (d, *J* = 6.7 Hz, 3H), 0.68 (t, *J* = 7.4 Hz, 3H); <sup>13</sup>C NMR (151 MHz, CDCl<sub>3</sub>) δ 180.0, 174.4, 167.4, 156.3, 128.6, 123.8, 116.8, 115.5,



111.0, 72.8, 57.8, 55.7, 48.3, 47.6, 40.1, 31.7, 20.1, 17.6, 16.4, 11.1; HRMS  
(ESI) calcd. for  $C_{20}H_{26}N_3O_4$  372.1923; found 372.1917.

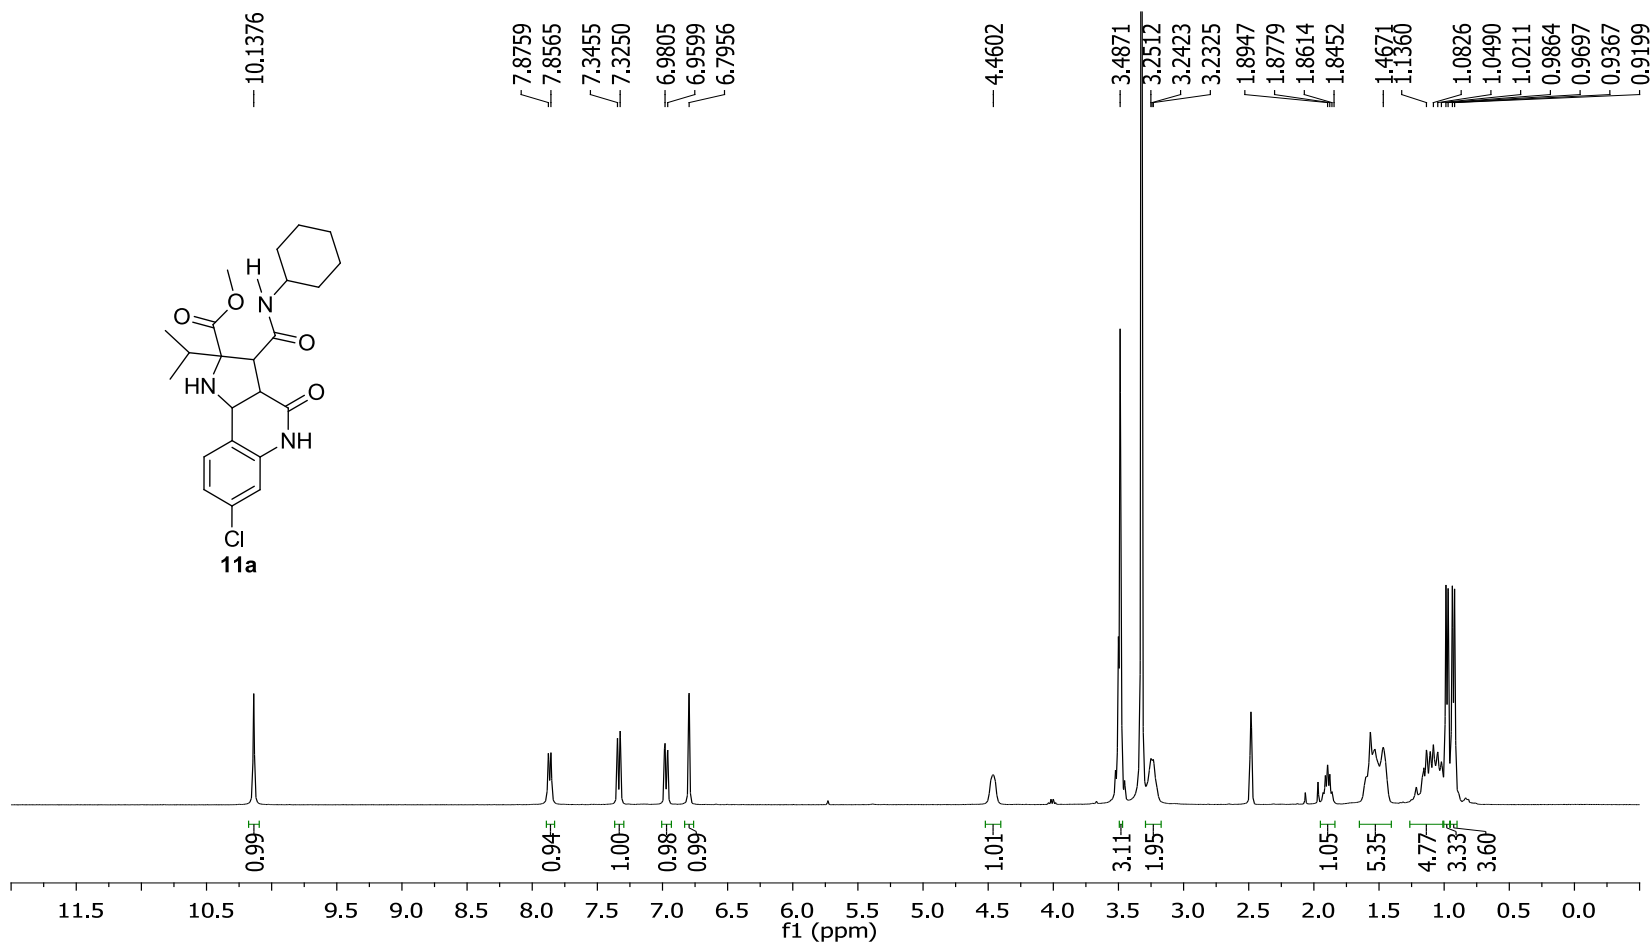

$^1\text{H}$  NMR spectrum (400 MHz) of compound **11a** in  $\text{DMSO-}d_6$

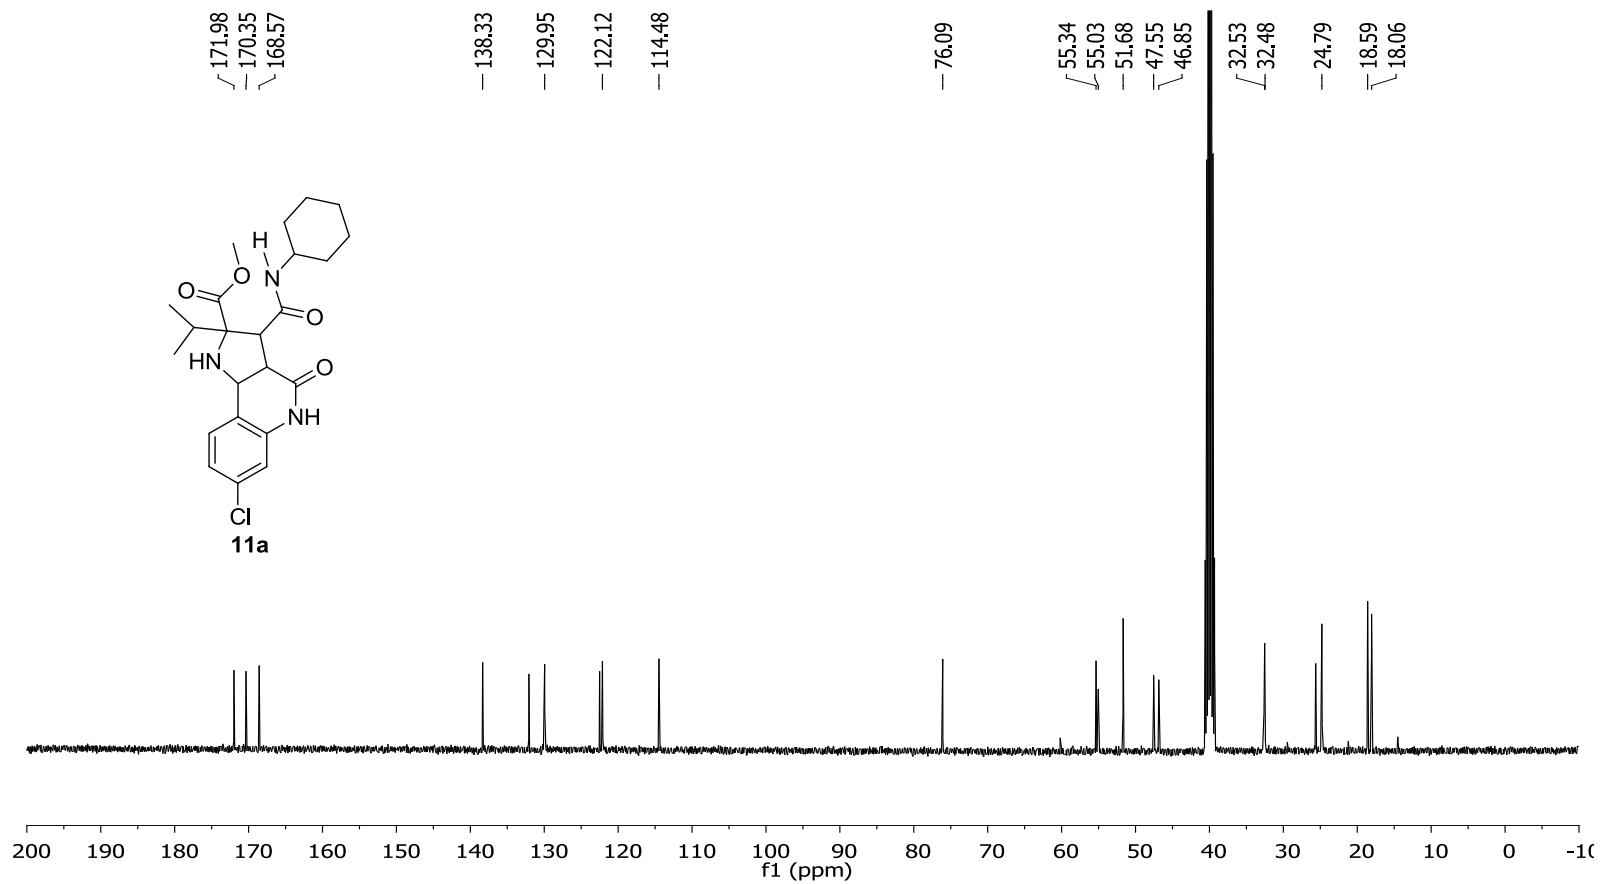

<sup>13</sup>C NMR spectrum (101 MHz) of compound 11a in DMSO-*d*<sub>6</sub>

---

## Display Report

---

| Meas. m/z | # | Ion Formula                                                     | m/z      | err [ppm] | mSigma | # Sigma | Score  | rdb | e <sup>-</sup> Conf | N-Rule | Adduct |
|-----------|---|-----------------------------------------------------------------|----------|-----------|--------|---------|--------|-----|---------------------|--------|--------|
| 448.1998  | 1 | C <sub>23</sub> H <sub>31</sub> ClN <sub>3</sub> O <sub>4</sub> | 448.1998 | -0.1      | 29.4   | 1       | 100.00 | 9.5 | even                | ok     | M+H    |

HRMS of compound **11a**

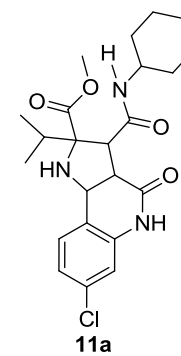

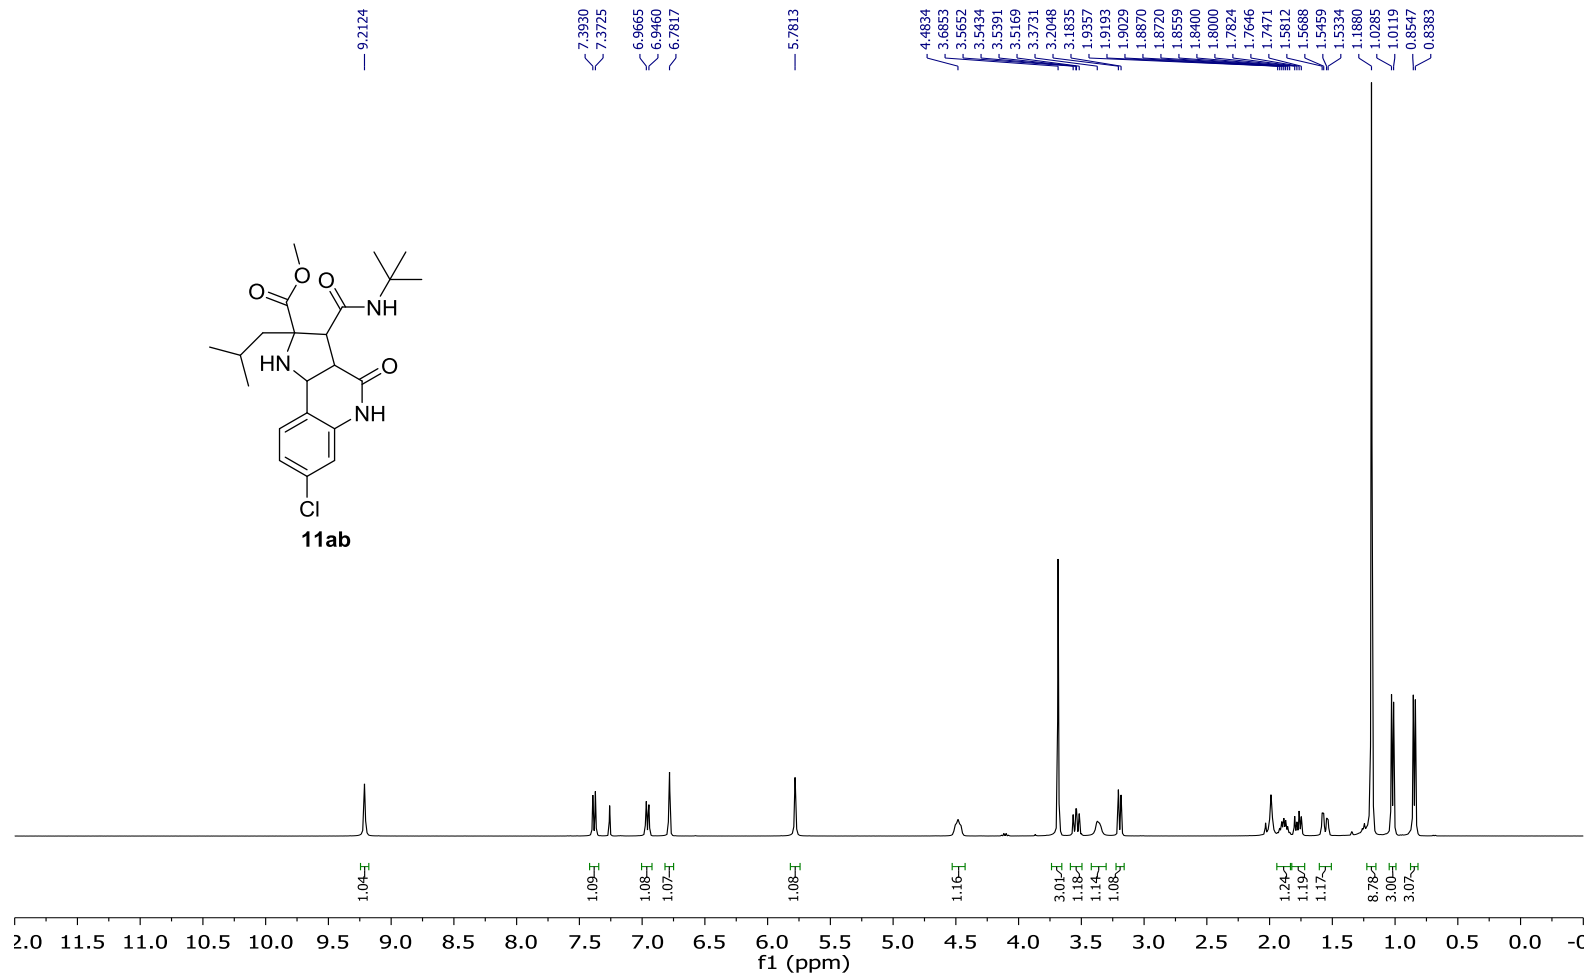

**<sup>1</sup>H NMR (400 MHz) of compound 11ab in CDCl<sub>3</sub>**

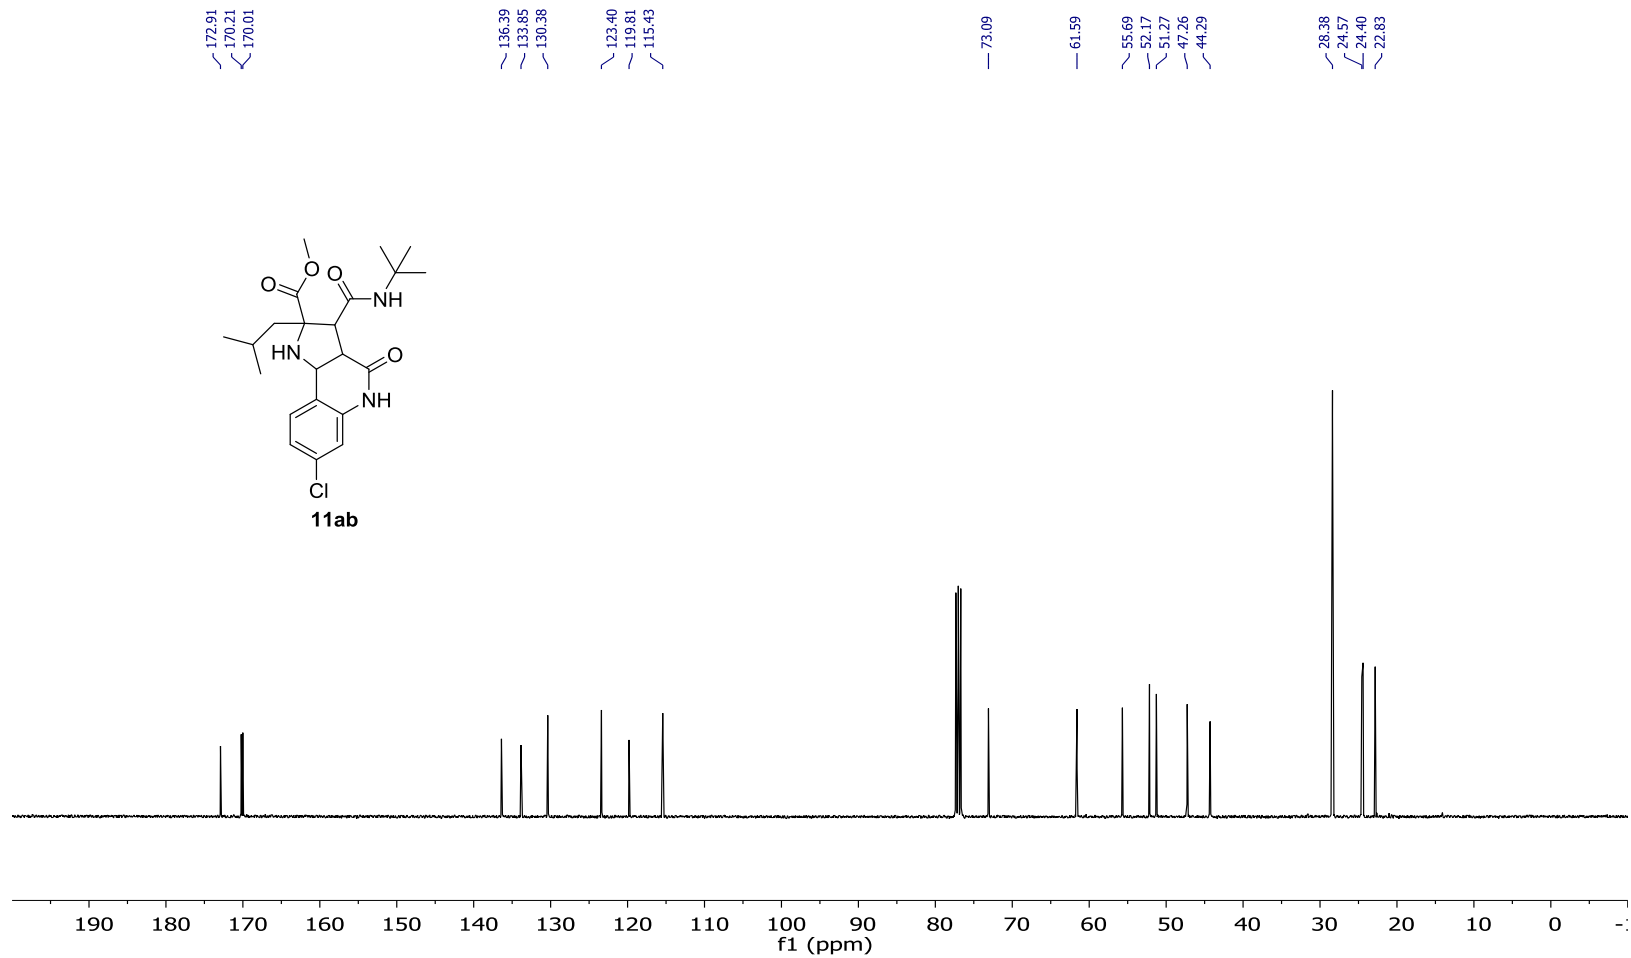

## Display Report

**Analysis Info**  
Analysis Name D:\Data\inctu service\data\2020\20200619\LYL-3065-1\_GB3\_01\_20897.d Acquisition Date 6/19/2020 12:01:43 PM  
Method Small molecule.m Operator NCTU  
Sample Name LYL-3065-1 Instrument impact HD 1819096.00164  
Comment

**Acquisition Parameter**  
Source Type ESI Ion Polarity Positive Set Nebulizer 1.0 Bar  
Focus Active Set Capillary 4500 V Set Dry Heater 200 °C  
Scan Begin 50 m/z Set End Plate Offset -500 V Set Dry Gas 8.0 l/min  
Scan End 1500 m/z Set Charging Voltage 2000 V Set Divert Valve Waste  
Set Corona 0 nA Set APCI Heater 0 °C

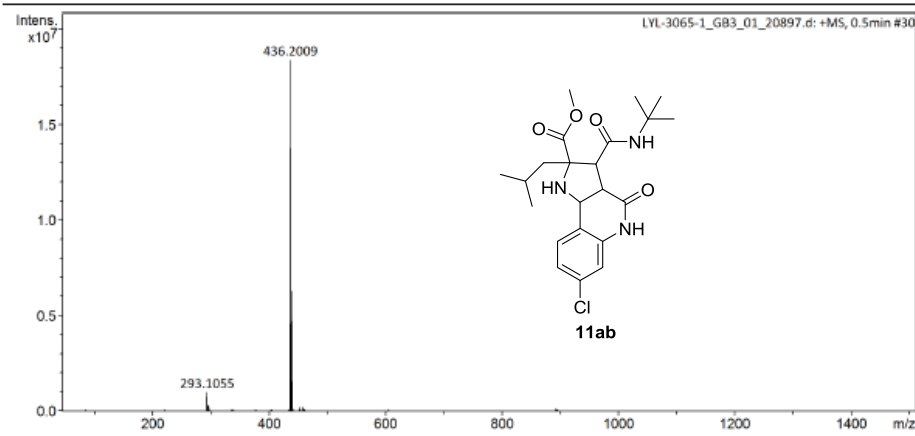

## Display Report

| Meas. m/z | # | Ion Formula  | m/z      | err [ppm] | mSigma | # Sigma | Score  | rdB | e <sup>-</sup> Conf | N-Rule | Adduct |
|-----------|---|--------------|----------|-----------|--------|---------|--------|-----|---------------------|--------|--------|
| 436.2009  | 1 | C22H31ClN3O4 | 436.1998 | -2.5      | 10.8   | 1       | 100.00 | 8.5 | even                | ok     | M+H    |

HRMS (ESI) of compound **11ab**

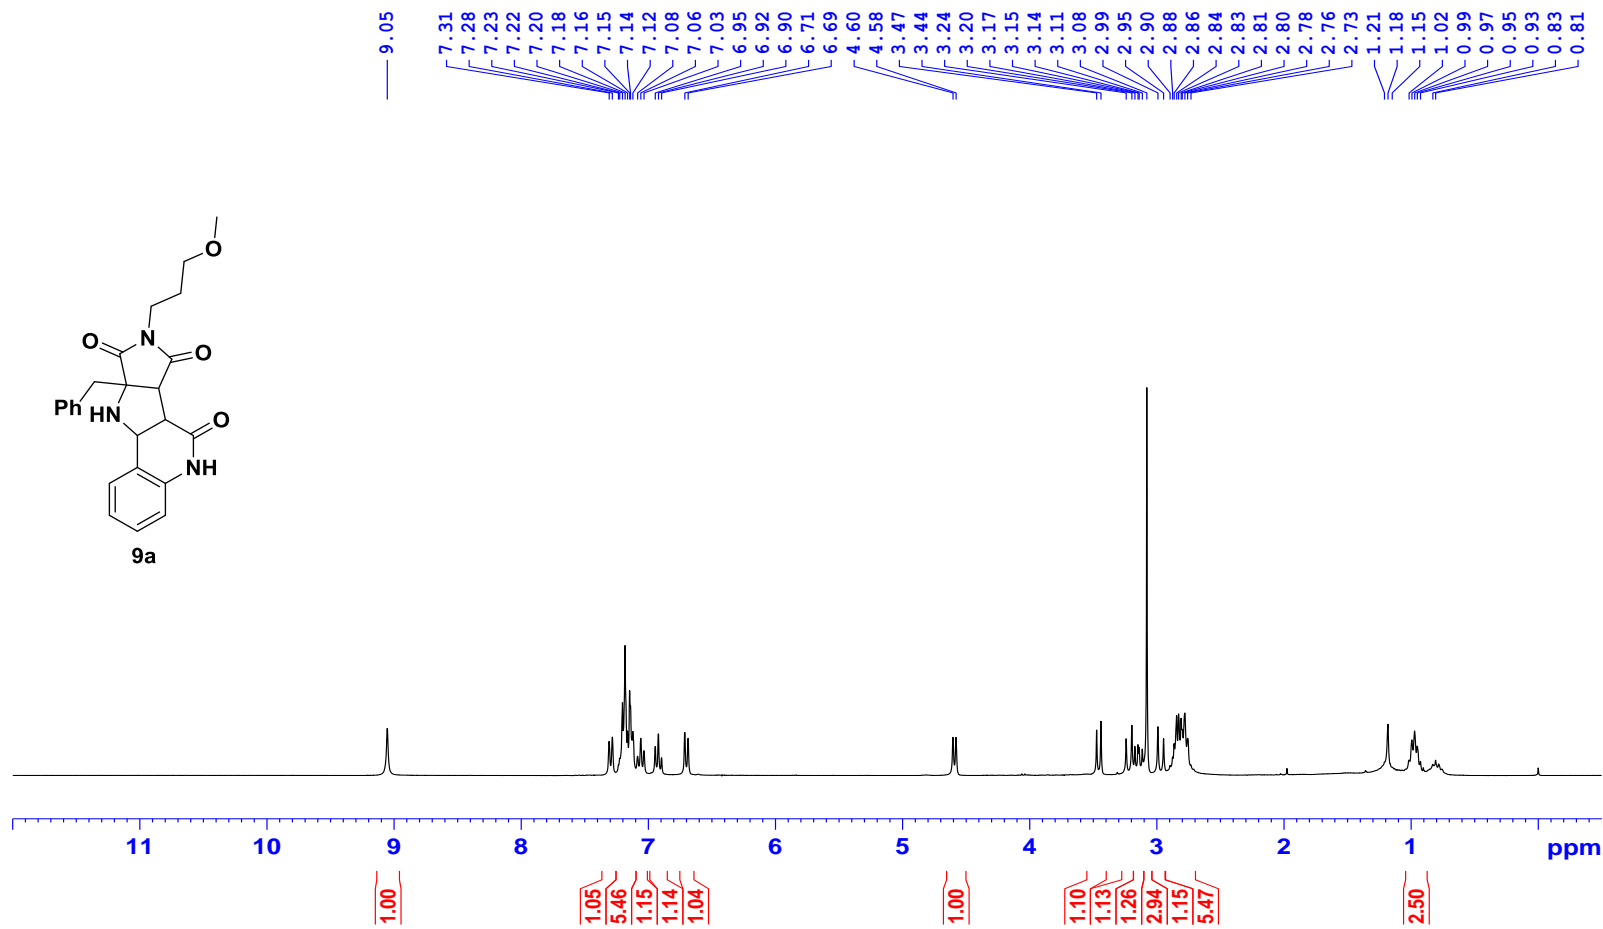

$^1\text{H}$  NMR spectrum (400 MHz) of compound **9a** in  $\text{CDCl}_3$



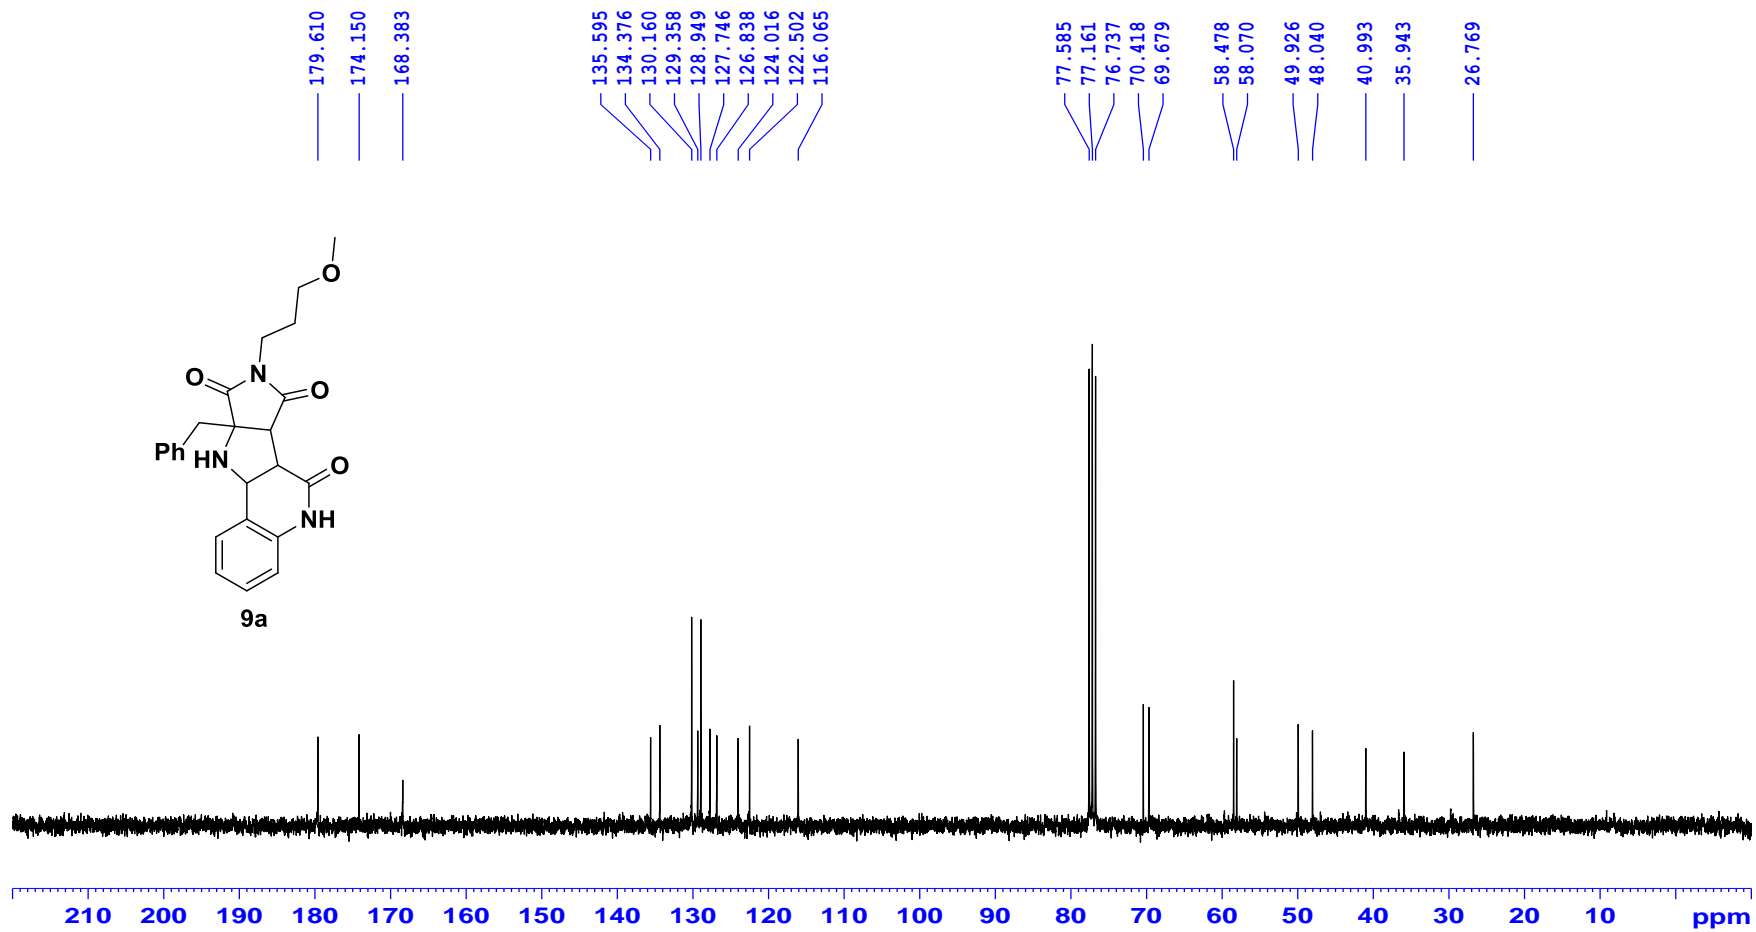

<sup>13</sup>C NMR spectrum (101 MHz) of compound **9a** in CDCl<sub>3</sub>

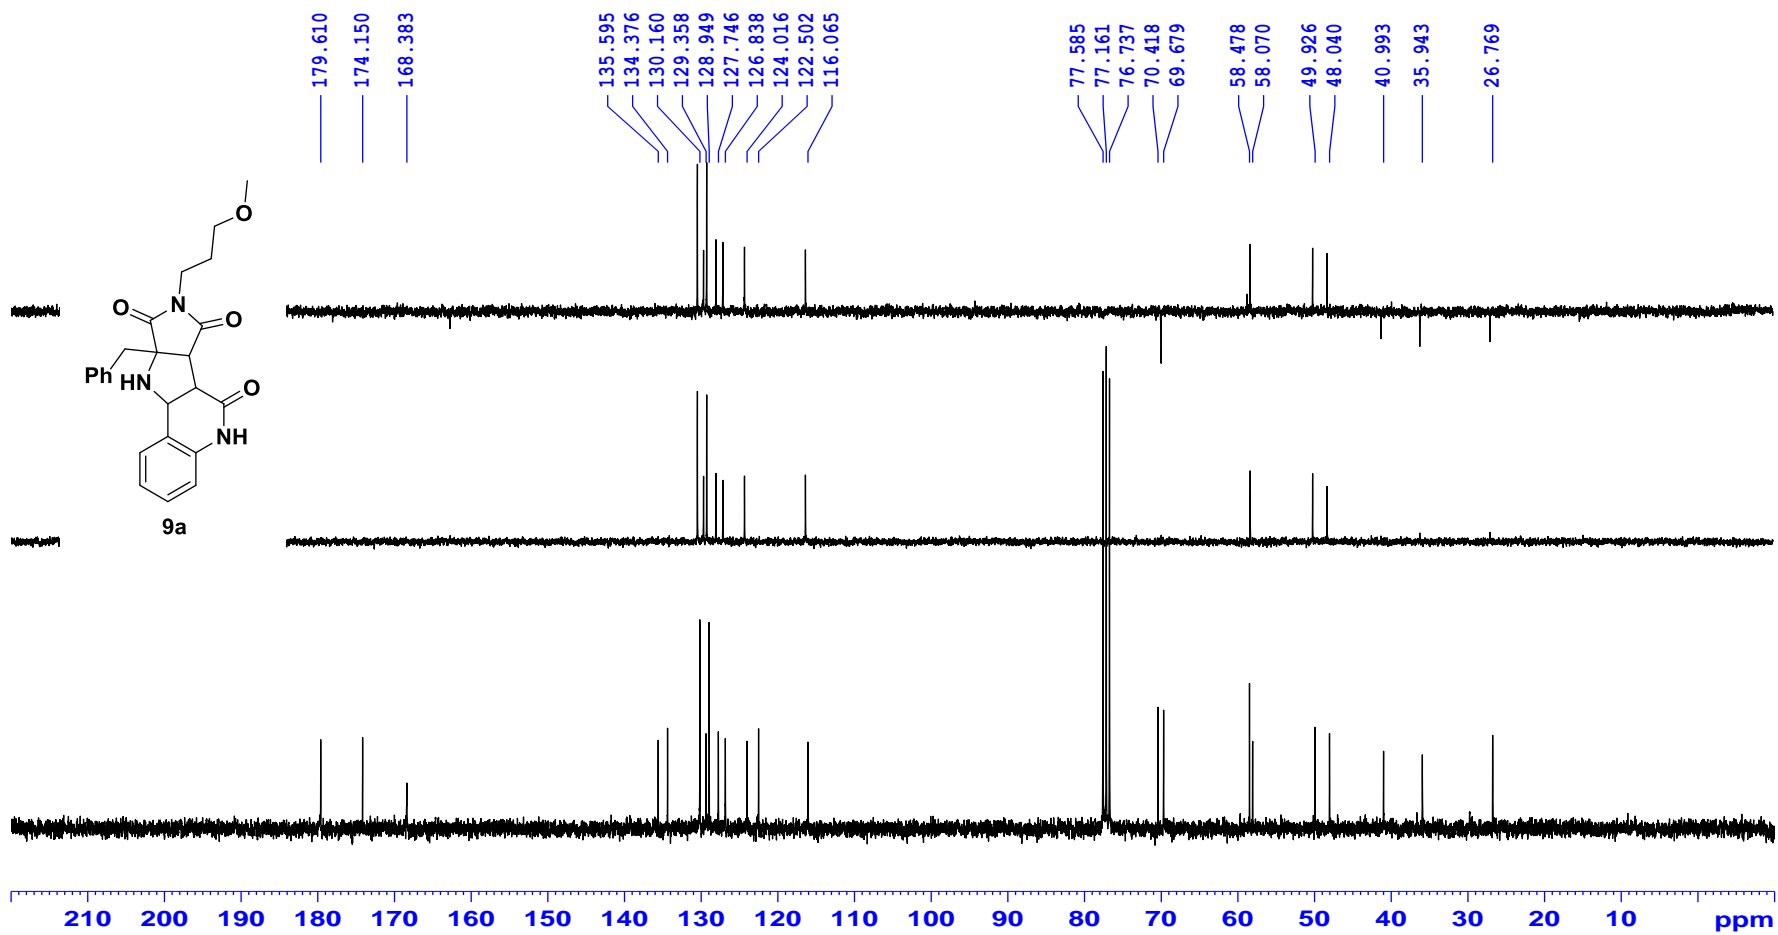

DEPT spectrum (101 MHz) of compound **9a** in CDCl<sub>3</sub>

```

LIST: hei2532(1eeut-el03)-c4      29-Sep-11 REG : 08:24.1 #9
Samp:                               Start : 16:39:04 3358
Mode: EI +VE +LMR ESCAN (EXP) UP   $\mu$ R NRM Inlet :
Oper:
Limit: ( 0)
      : (466) C25.H44.N3.O5
Peak: 1000.00 mmu R+D: -2.0 > 60.0
Data: +/-1616>1782 (CMASS : converted; CMASS : converted; CMASS : con

```

| Mass     | Intensity | %RA    | Flags | Delta (mmu) | R+D  | Composition   |
|----------|-----------|--------|-------|-------------|------|---------------|
| 419.1854 | 76835     | 100.00 | #     | -0.9        | 14.C | C24.H25.N3.O4 |

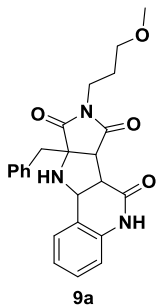

HRMS of compound **9a**

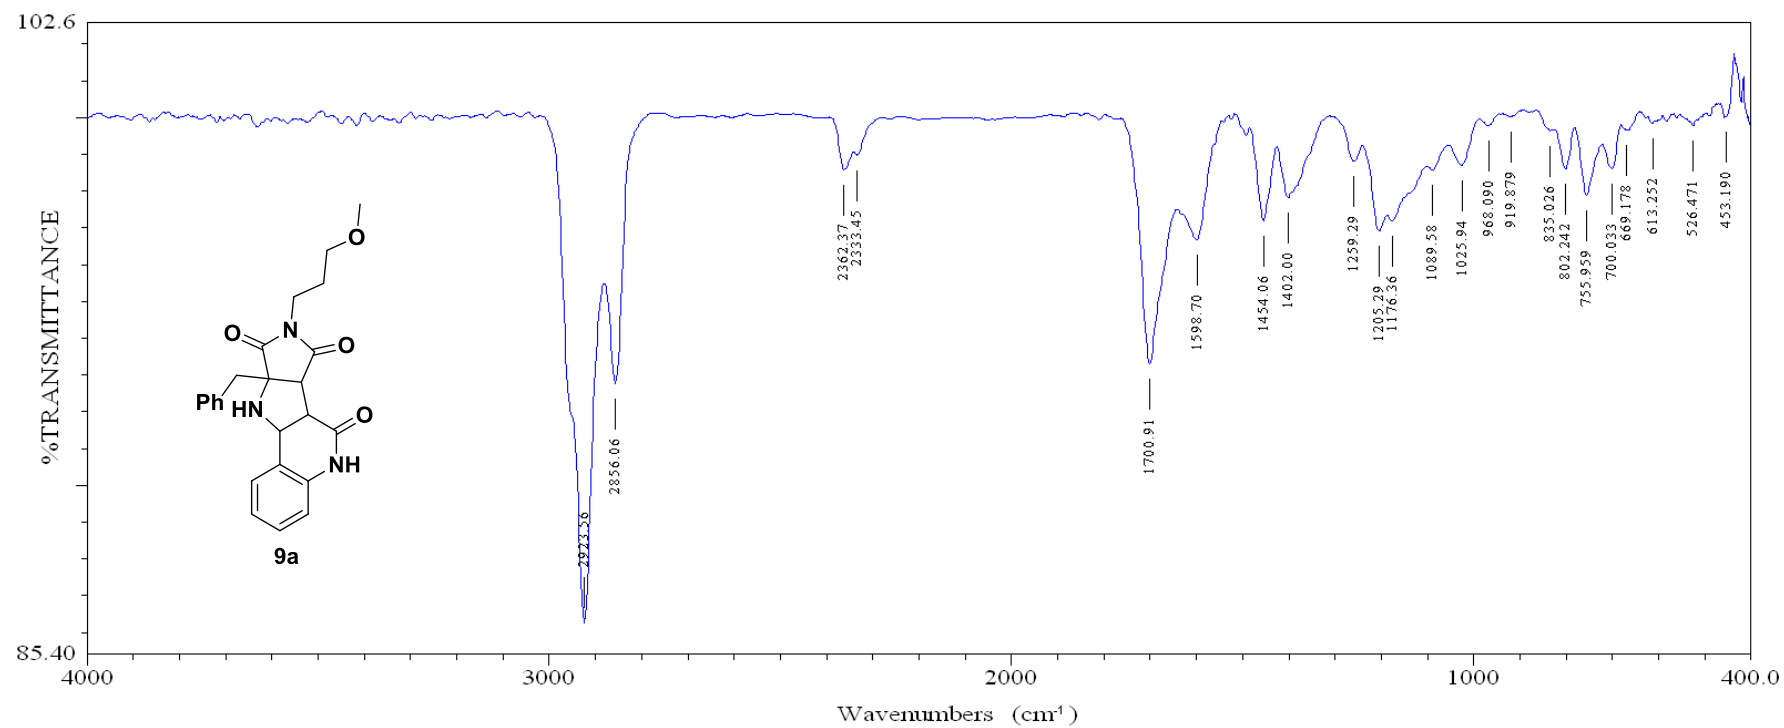

IR of compound **9a**

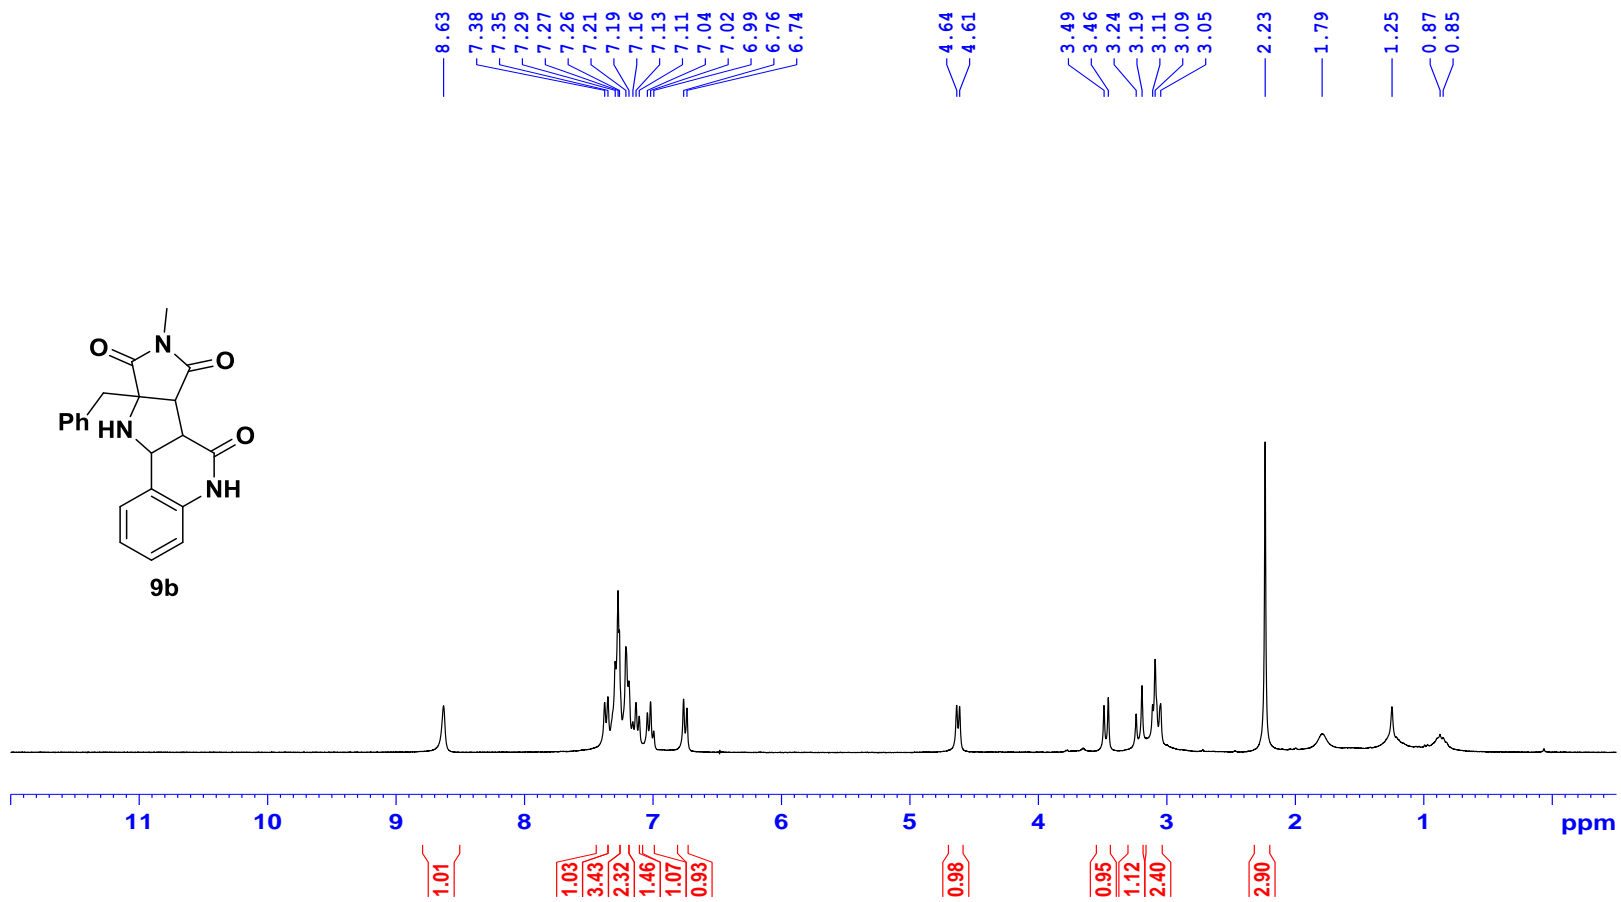

$^1\text{H}$  NMR spectrum (400 MHz) of compound **9b** in  $\text{CDCl}_3$

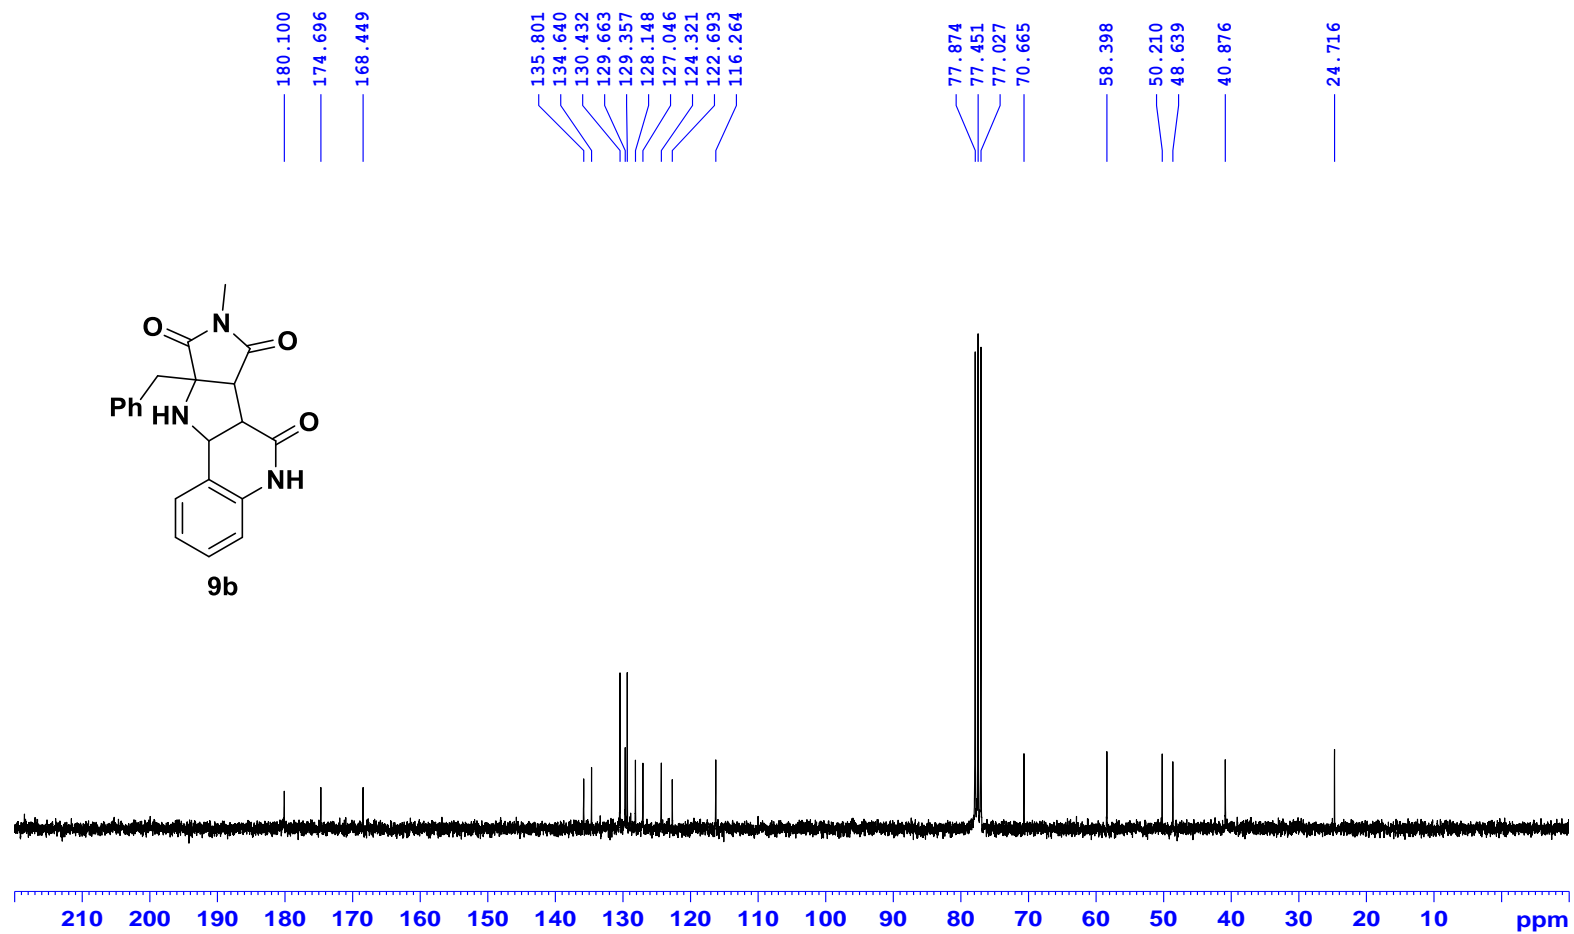

<sup>13</sup>C NMR spectrum (101 MHz) of compound **9b** in CDCl<sub>3</sub>

LIST: hei2111(leeutel02)-c3                      07-Jun-11 REG : 04:14.3       #9  
Samp:                                              Start : 16:16:35    2209  
Mode: EI +VE +LMR ESCAN (EXP) UP HR NRM  
Oper:                                              Inlet :  
Limit: ( 0)  
      : (388) C21.H30.N3.O4  
Peak: 1000.00 mmu    R+D: -2.0 > 60.0  
Data: +/792>901 (CMASS : converted | CMASS : converted | CMASS : conve

| Mass     | Intensity | %RA    | Flags | Delta | R+D  | Composition   |
|----------|-----------|--------|-------|-------|------|---------------|
| 361.1434 | 49466     | 100.00 | #     | -0.8  | 14.0 | C21.H19.N3.O3 |

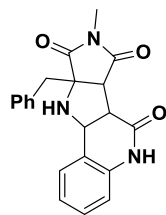

9b

HRMS (EI) of compound **9b**

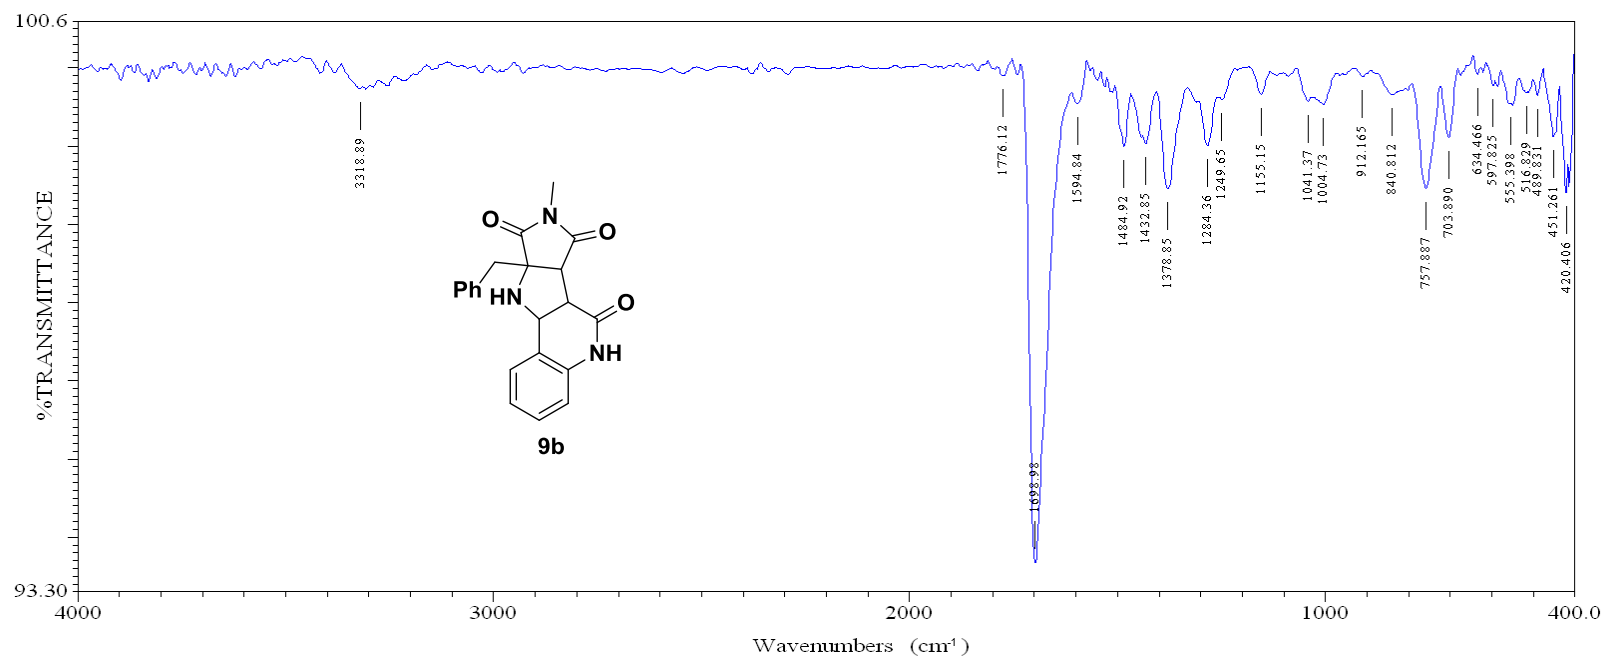

IR of compound **9b**



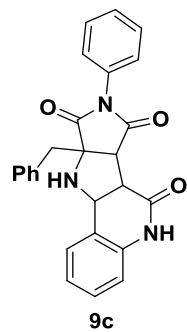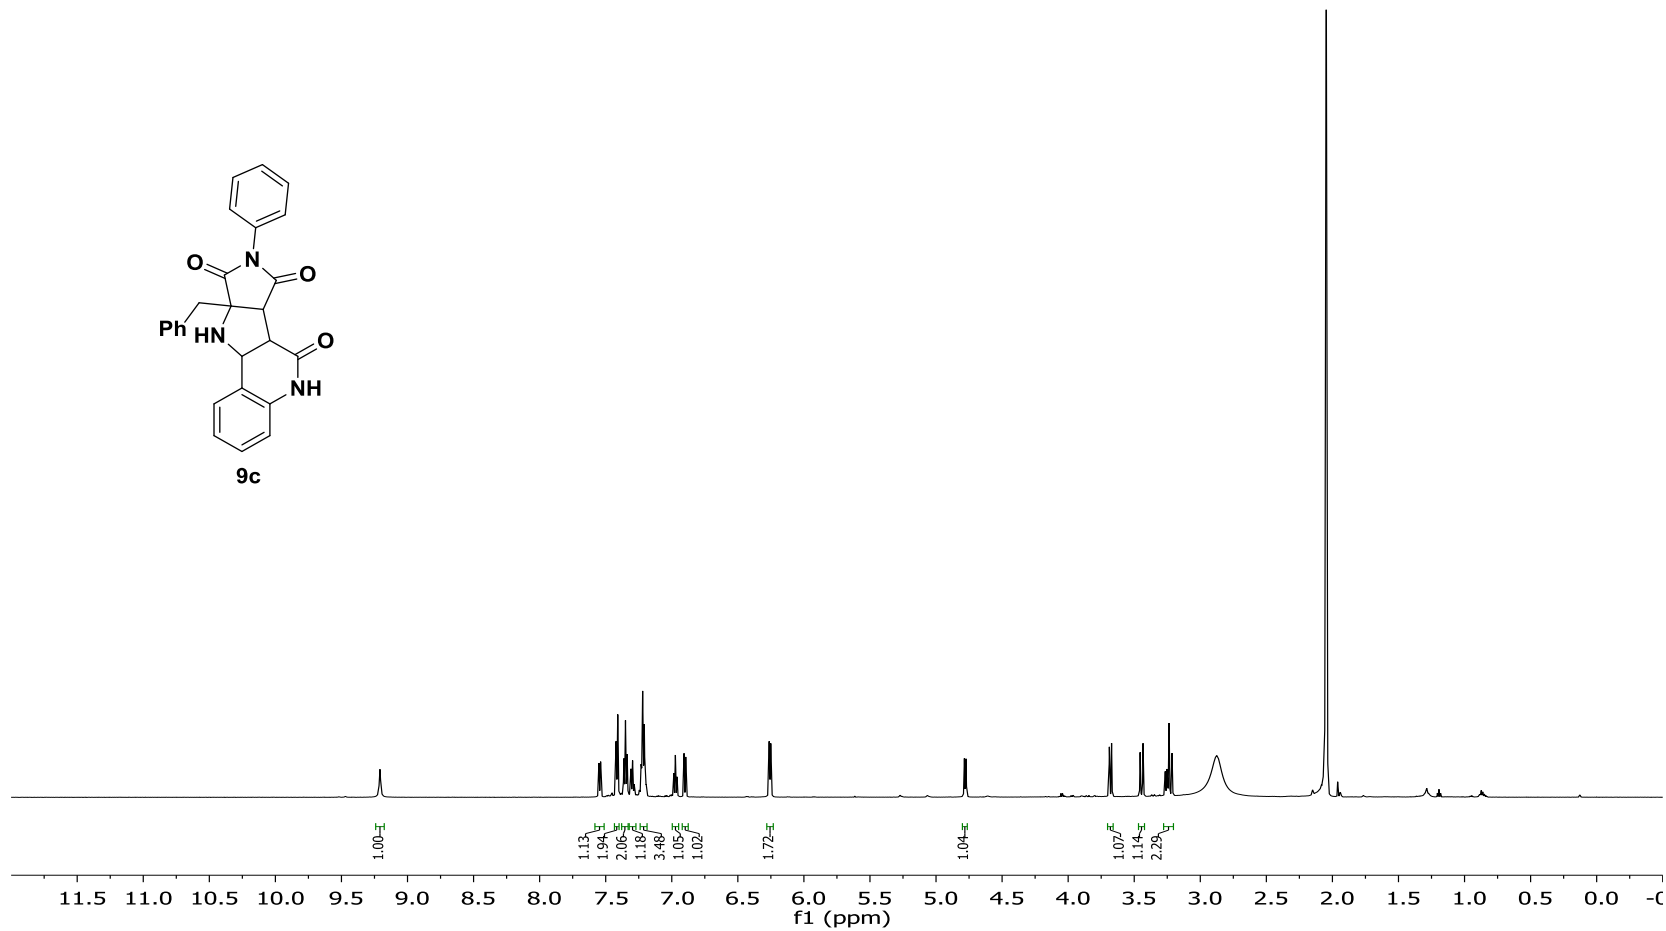

<sup>1</sup>H NMR spectrum (400 MHz) of compound **9c** in CDCl<sub>3</sub>

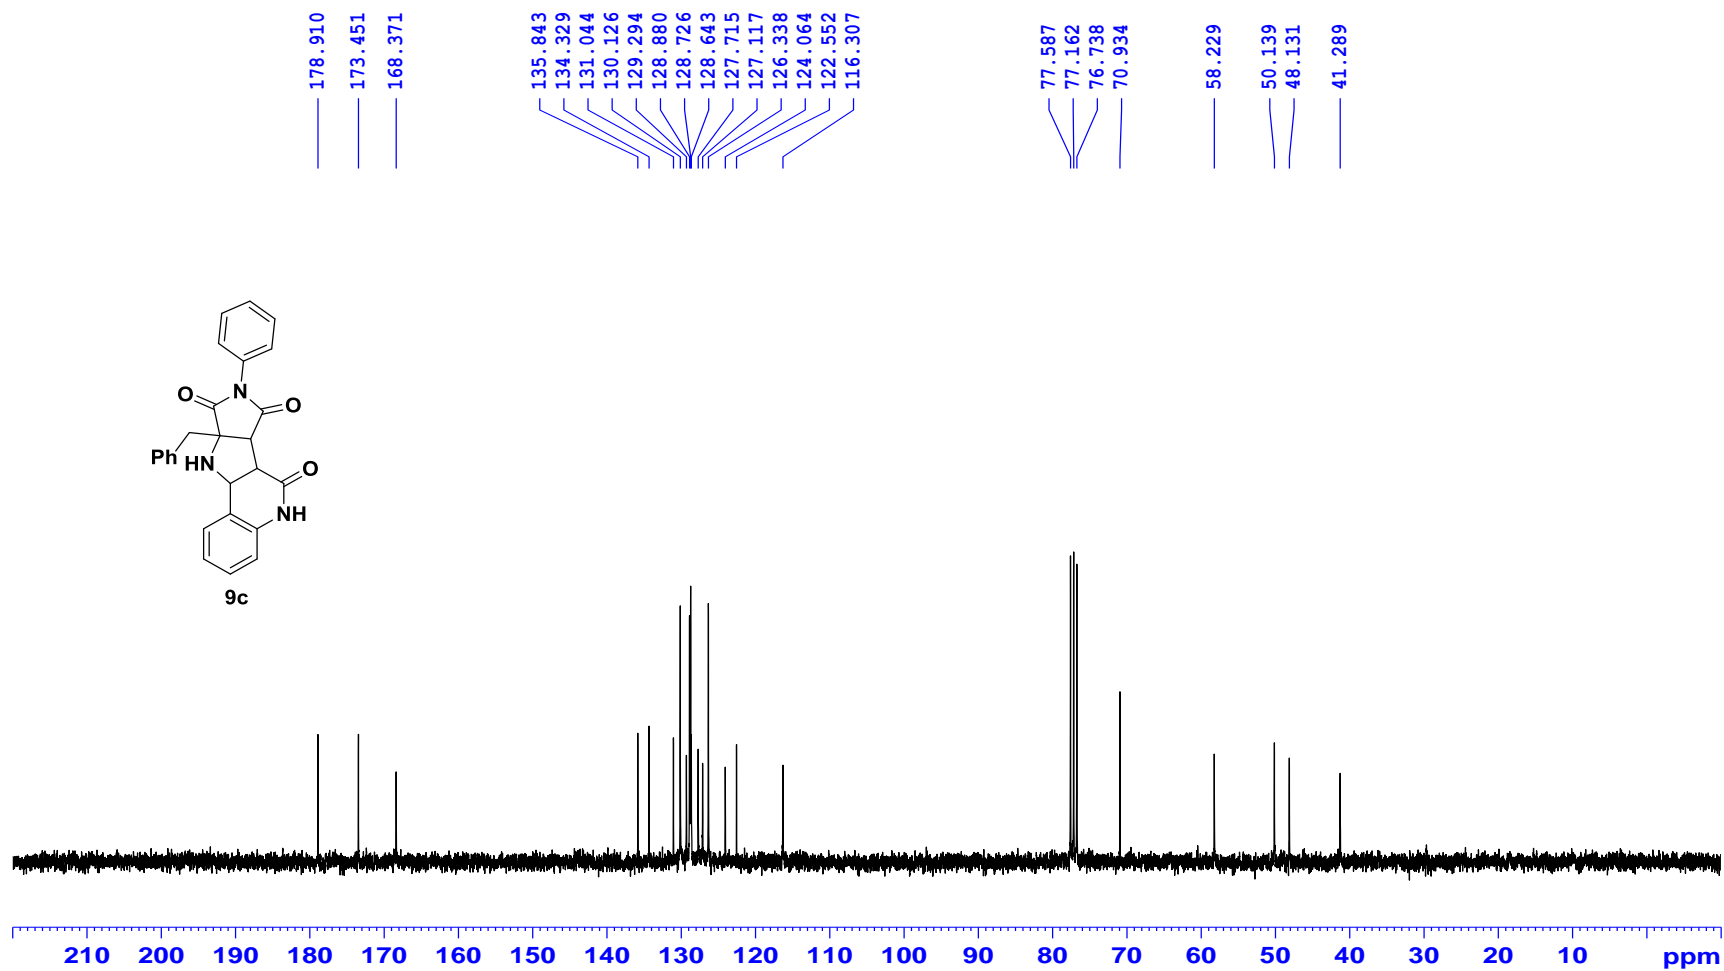

<sup>13</sup>C NMR spectrum (101 MHz) of compound **9c** in CDCl<sub>3</sub>

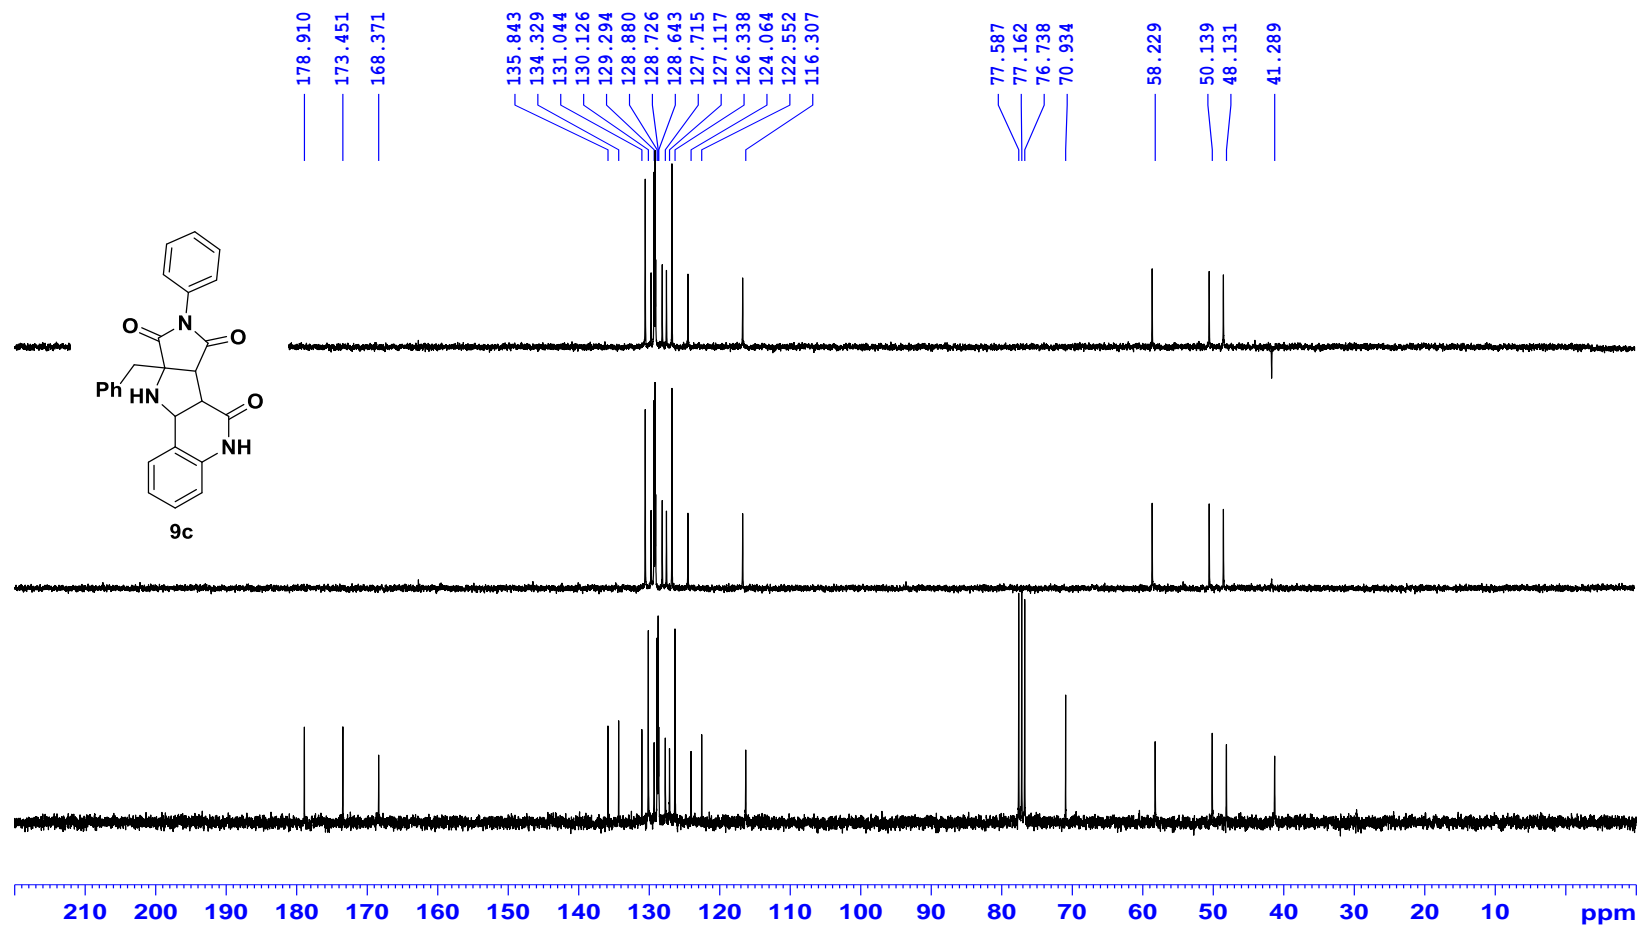

DEPT of compound **9c** in CDCl<sub>3</sub>

```

LIST: hei2112(leeutel01)-c3          07-Jun-11 REG   : 07:07.4    #9
Samp:                                 Start  : 16:30:22   8816
Mode: EI +VE +LMR ESCAN (EXP) UP HR NRM
Oper:                                 Inlet  :
Lint: ( 0)
      : (468) C29.H30.N3.O3
Peak: 1000.00 mmu   R+D: -2.0 > 60.0
Data: +/1369>1752 (CMASS : converted |CMASS : converted |CMASS : con

```

| Mass     | Intensity | %RA   | Flags | Delta (mmu) | R+D  | Composition   |
|----------|-----------|-------|-------|-------------|------|---------------|
| 423.1591 | 4528      | 35.68 | #     | -0.8        | 18.0 | C26.H21.N3.O3 |

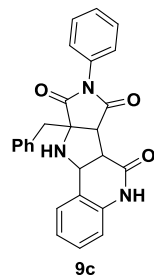

HRMS (EI) of compound **9c**

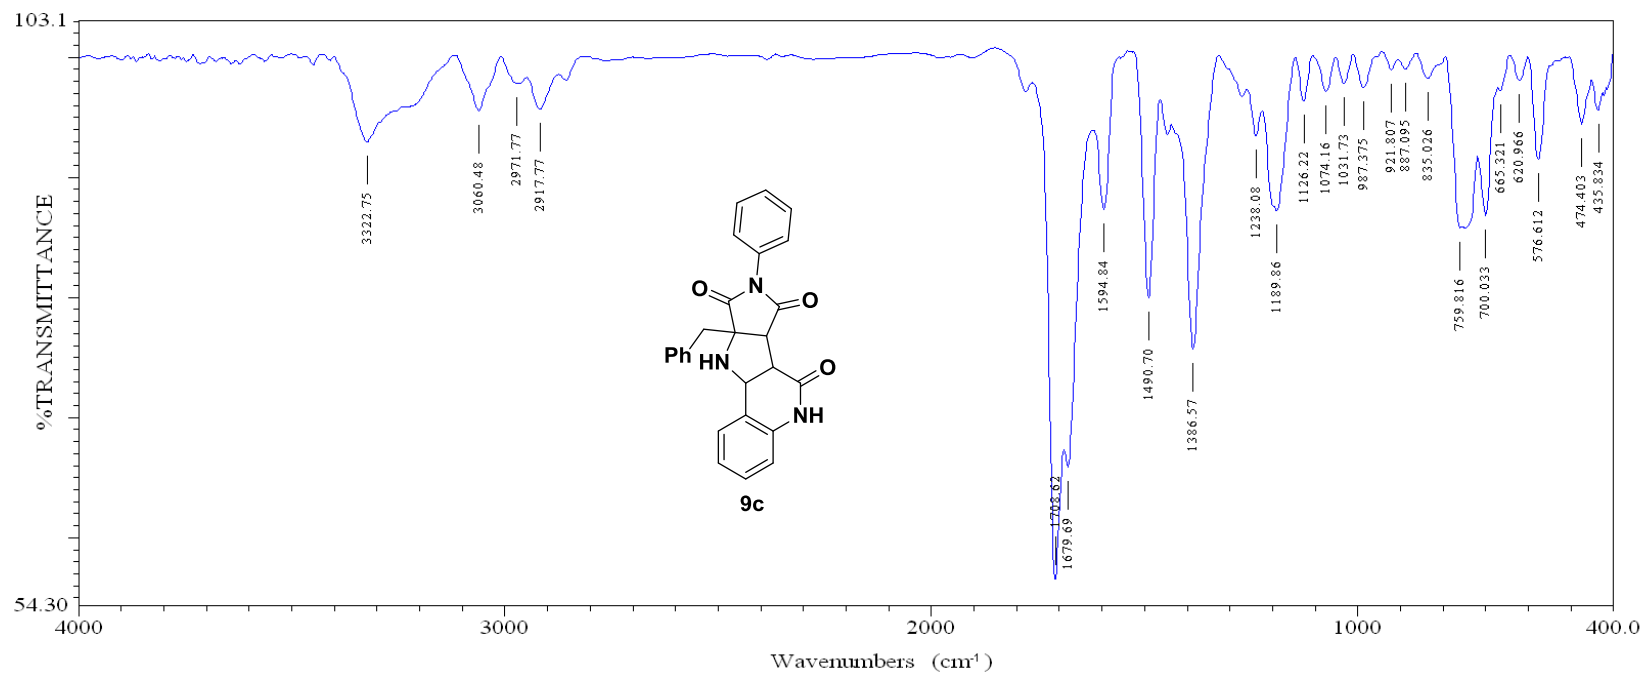

IR of compound **9c**

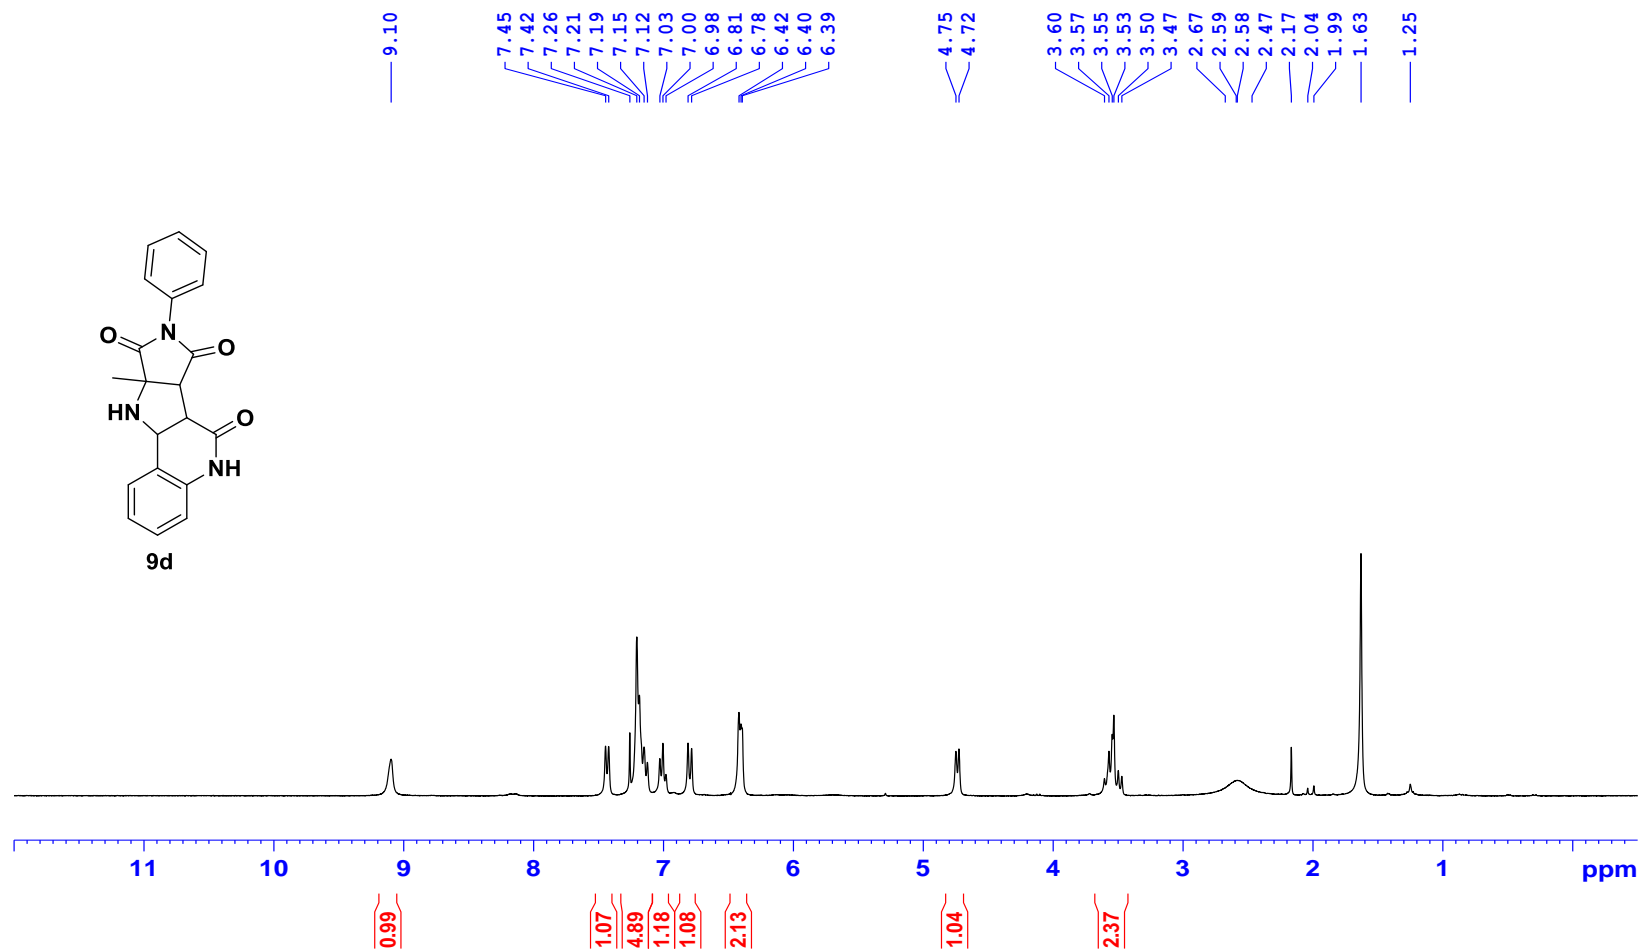

<sup>1</sup>H NMR spectrum (400 MHz) of compound **9d** in CDCl<sub>3</sub>

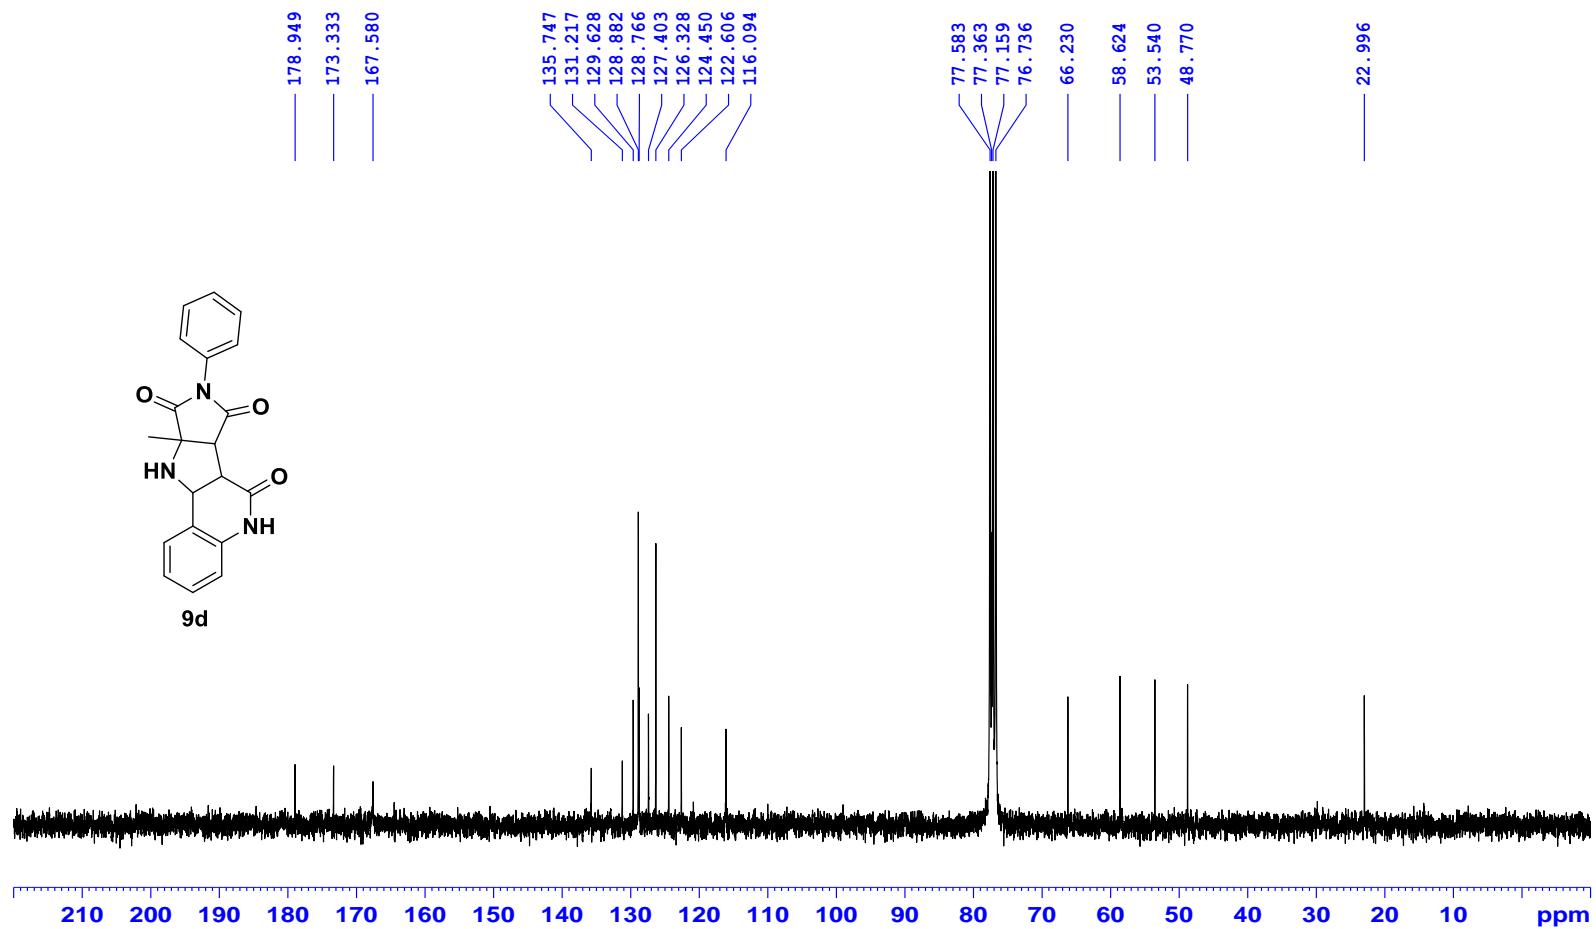

<sup>13</sup>C NMR spectrum (101 MHz) of compound **9d** in CDCl<sub>3</sub>

LIST: hei2110(leeutel04)-c2 07-Jun-11 REG : 02:38.3 #9  
 Samp: Start : 15:40:28 6177  
 Mode: EI +VE +LMR ESCAN (EXP) UP HR NRM Inlet :  
 Oper:  
 Limit: ( 0)  
 : (388) C21.H30.N3.O4  
 Peak: 1000.00 mmu R+D: -2.0 > 60.0  
 Data: +/488>636 (CMASS : converted |CMASS : converted |CMASS : conve

| Mass     | Intensity | %RA    | Flags | Delta | R+D  | Composition   |
|----------|-----------|--------|-------|-------|------|---------------|
| 347.1265 | 34708     | 100.00 | #     | 0.5   | 14.0 | C20.H17.N3.O3 |

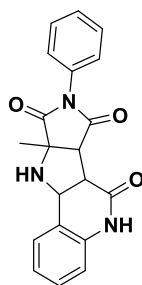

9d

HRMS (EI) of compound **9d**



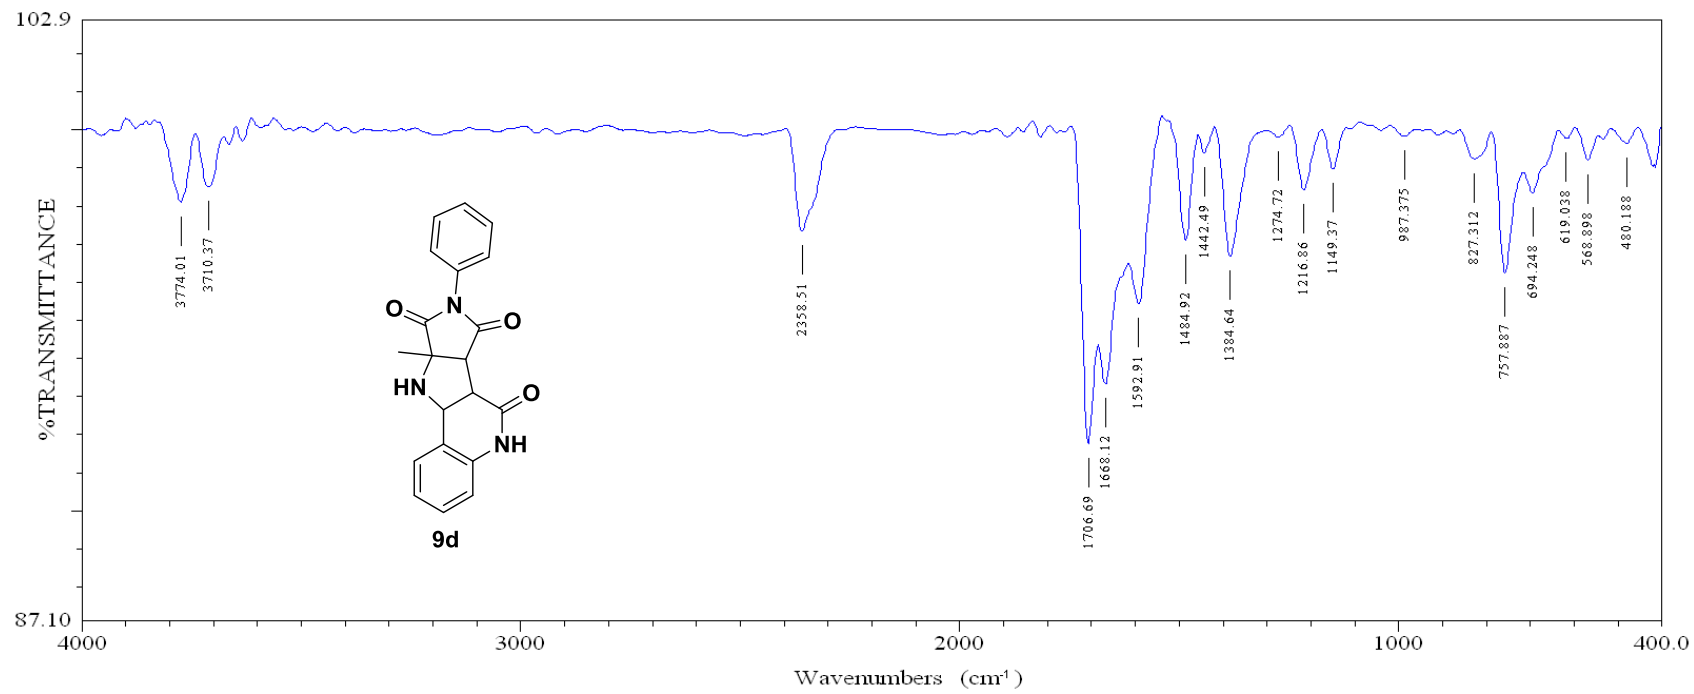

IR of compound **9d**

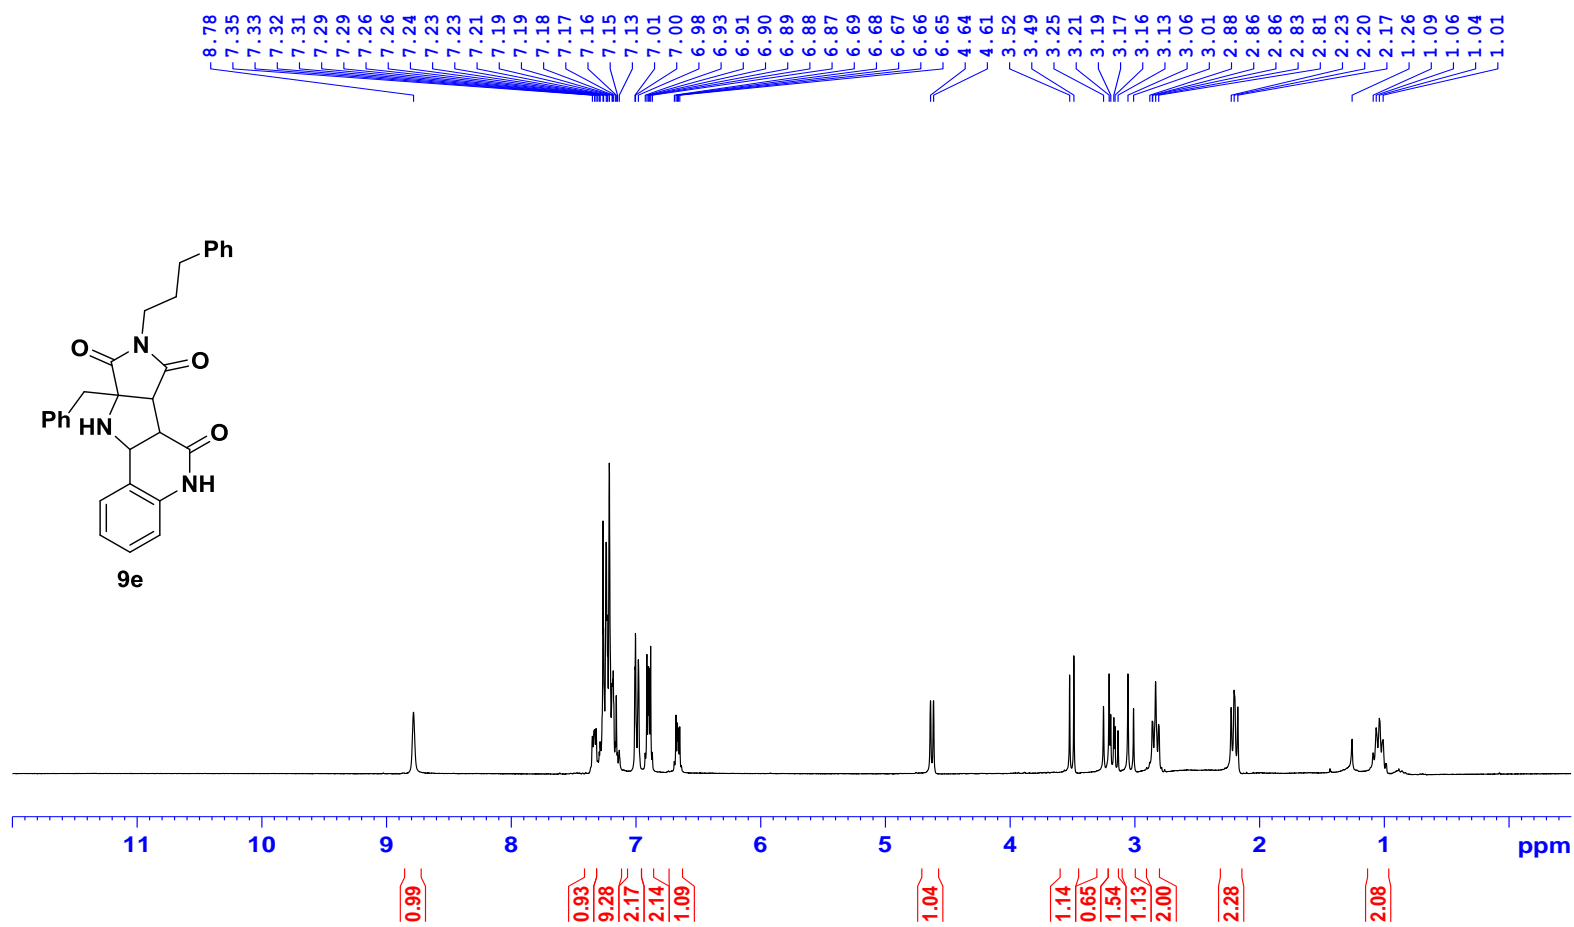

$^1\text{H}$  NMR spectrum (400 MHz) of compound **9e** in  $\text{CDCl}_3$

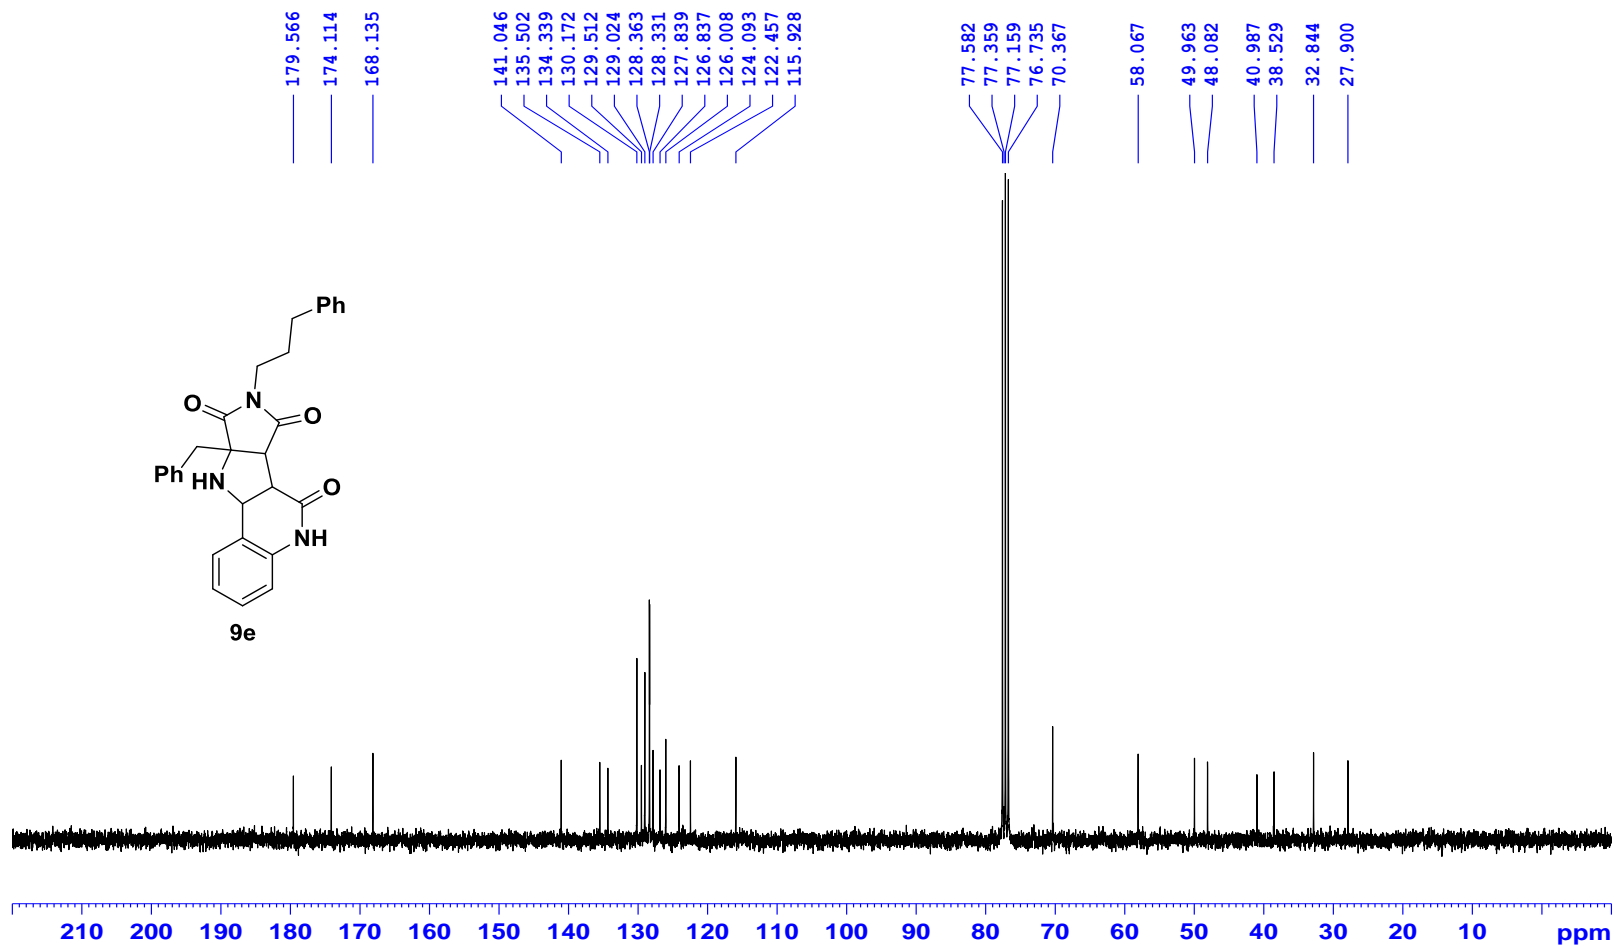

<sup>13</sup>C NMR spectrum (101 MHz) of compound **9e** in CDCl<sub>3</sub>

[ Elemental Composition ]

Data : 201111049

Date : 22-Oct-2011 17:25

Sample: leeut-E105

Note : -

Inlet : Direct

Ion Mode : EI+

RT : 1.18 min

Scan#: 59

Elements : C 29/0, H 27/0, O 5/0, N 3/0

Mass Tolerance : 1000ppm, 3mmu if m/z < 3, 5mmu if m/z > 5

Unsaturation (U.S.) : -0.1 - 36.0

| Observed m/z | Int% | Err[ppm / mmu] | U.S. | Composition       |
|--------------|------|----------------|------|-------------------|
| 465.2053     | 99.5 | +0.1 / +0.0    | 18.0 | C 29 H 27 O 3 N 3 |

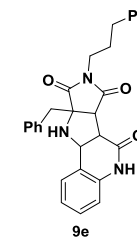

HRMS (EI) of compound **9e**

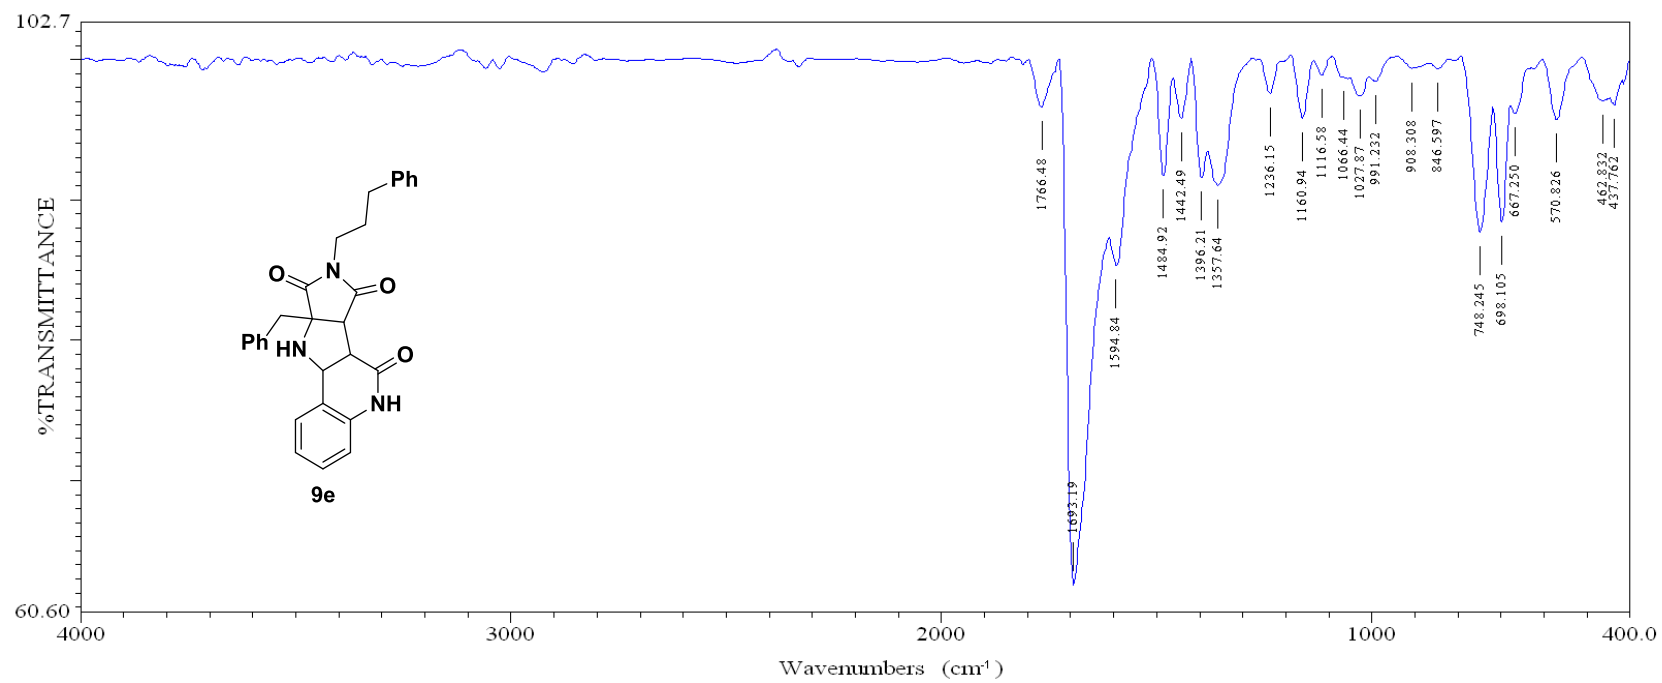

IR of compound **9e**

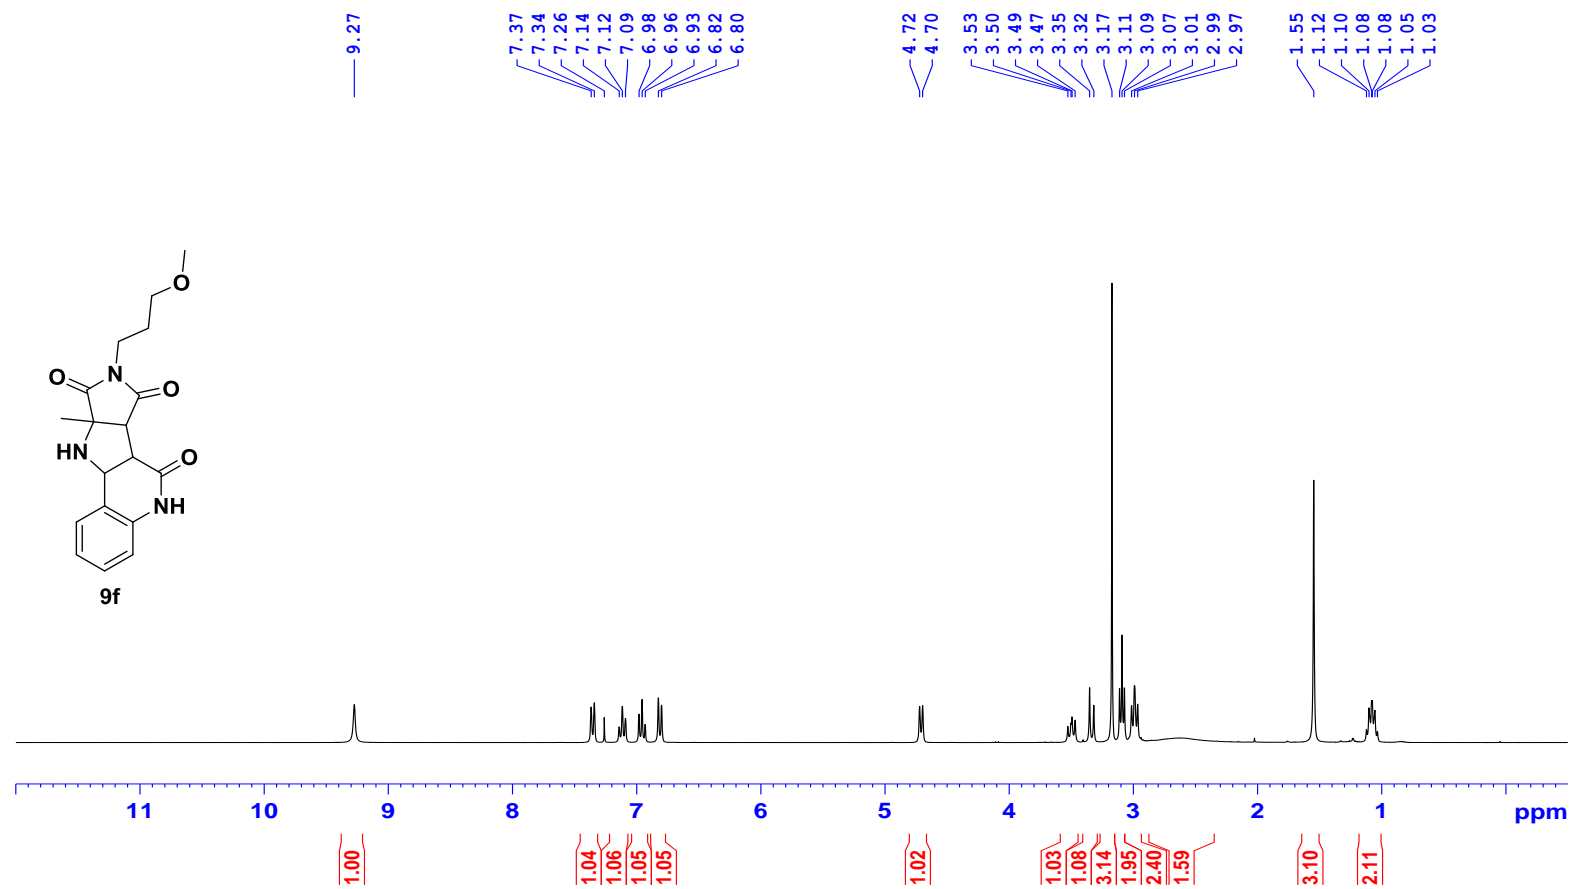

$^1\text{H}$  NMR spectrum (400 MHz) of compound **9f** in  $\text{CDCl}_3$

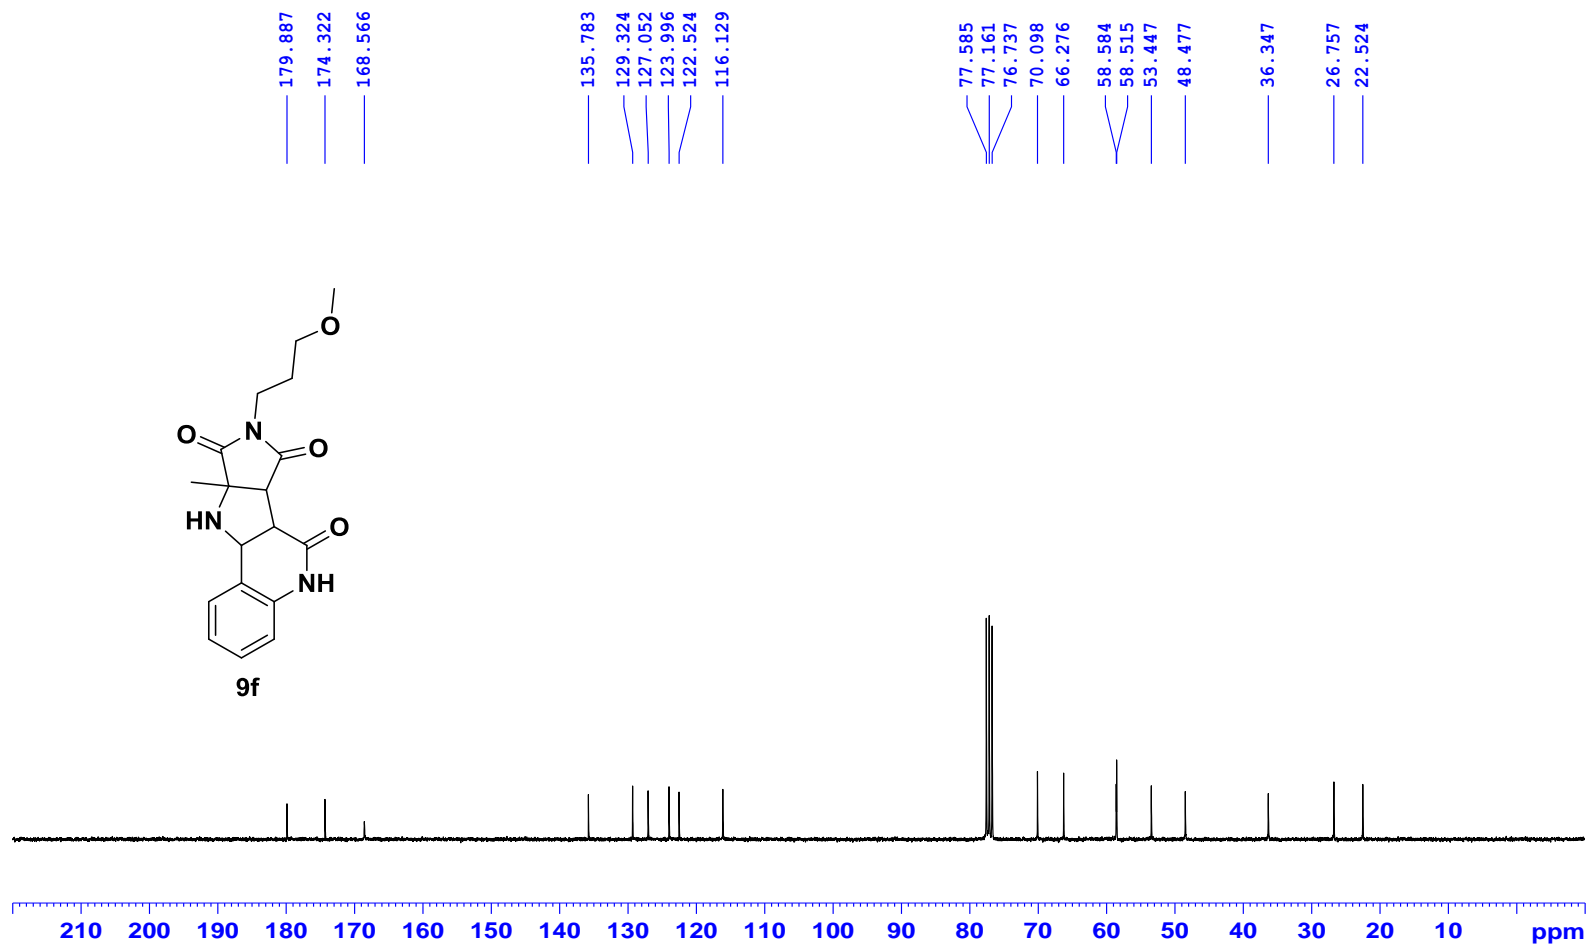

<sup>13</sup>C NMR spectrum (101 MHz) of compound **9f** in CDCl<sub>3</sub>

## [ Elemental Composition ]

Data : 1000512-013

Date : 12-May-2011 12:07

Sample: Leeut-EL06

Note : 343.38

Inlet : Direct

Ion Mode : EI+

RT : 0.95 min

Scan#: 58

Elements : C 18/0, H 36/0, N 3/0, O 4/0

Mass Tolerance : 10ppm, 3mmu if m/z &lt; 300, 20mmu if m/z &gt; 2000

Unsaturation (U.S.) : -0.5 - 200.0

| Observed m/z | Int%  | Err [ppm / mmu] | U.S. | Composition       |
|--------------|-------|-----------------|------|-------------------|
| 343.1523     | 100.0 | -2.8 / -1.0     | 10.0 | C 18 H 21 N 3 O 4 |

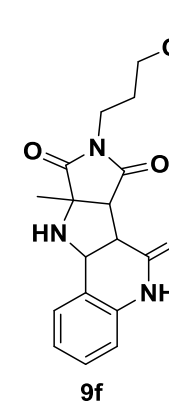

HRMS (EI) of compound 9f



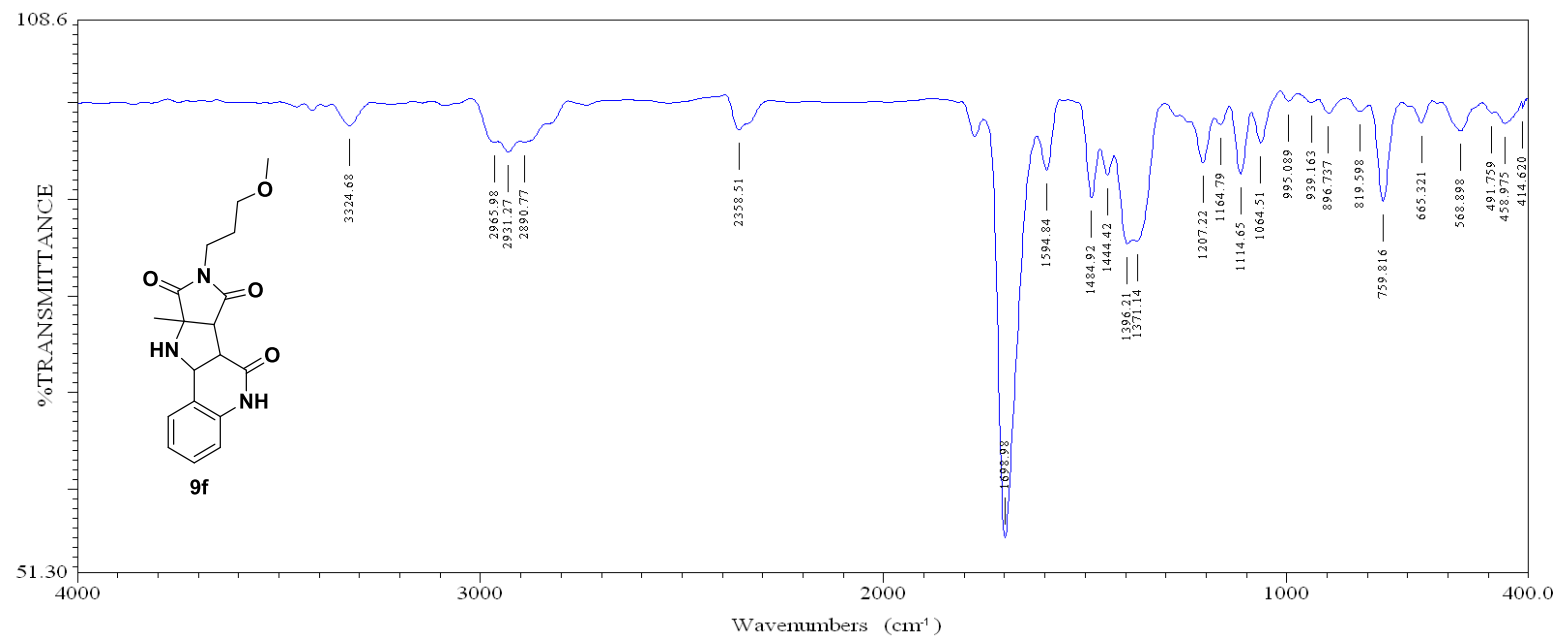

IR of compound **9f**

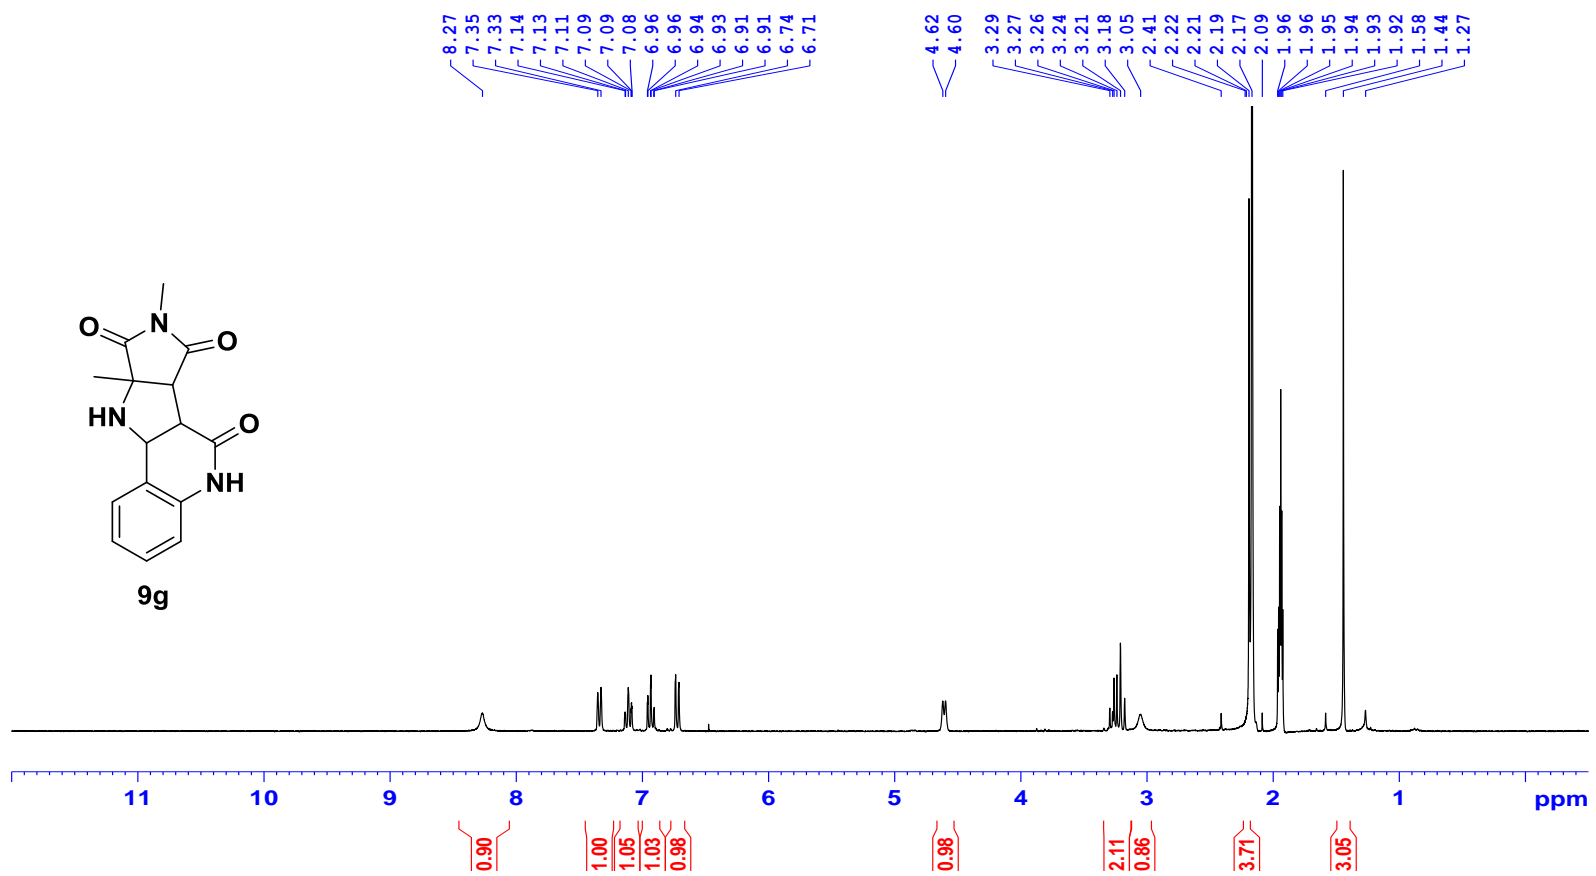

$^1\text{H}$  NMR spectrum (400 MHz) of compound **9g** in  $\text{CD}_3\text{CN}$

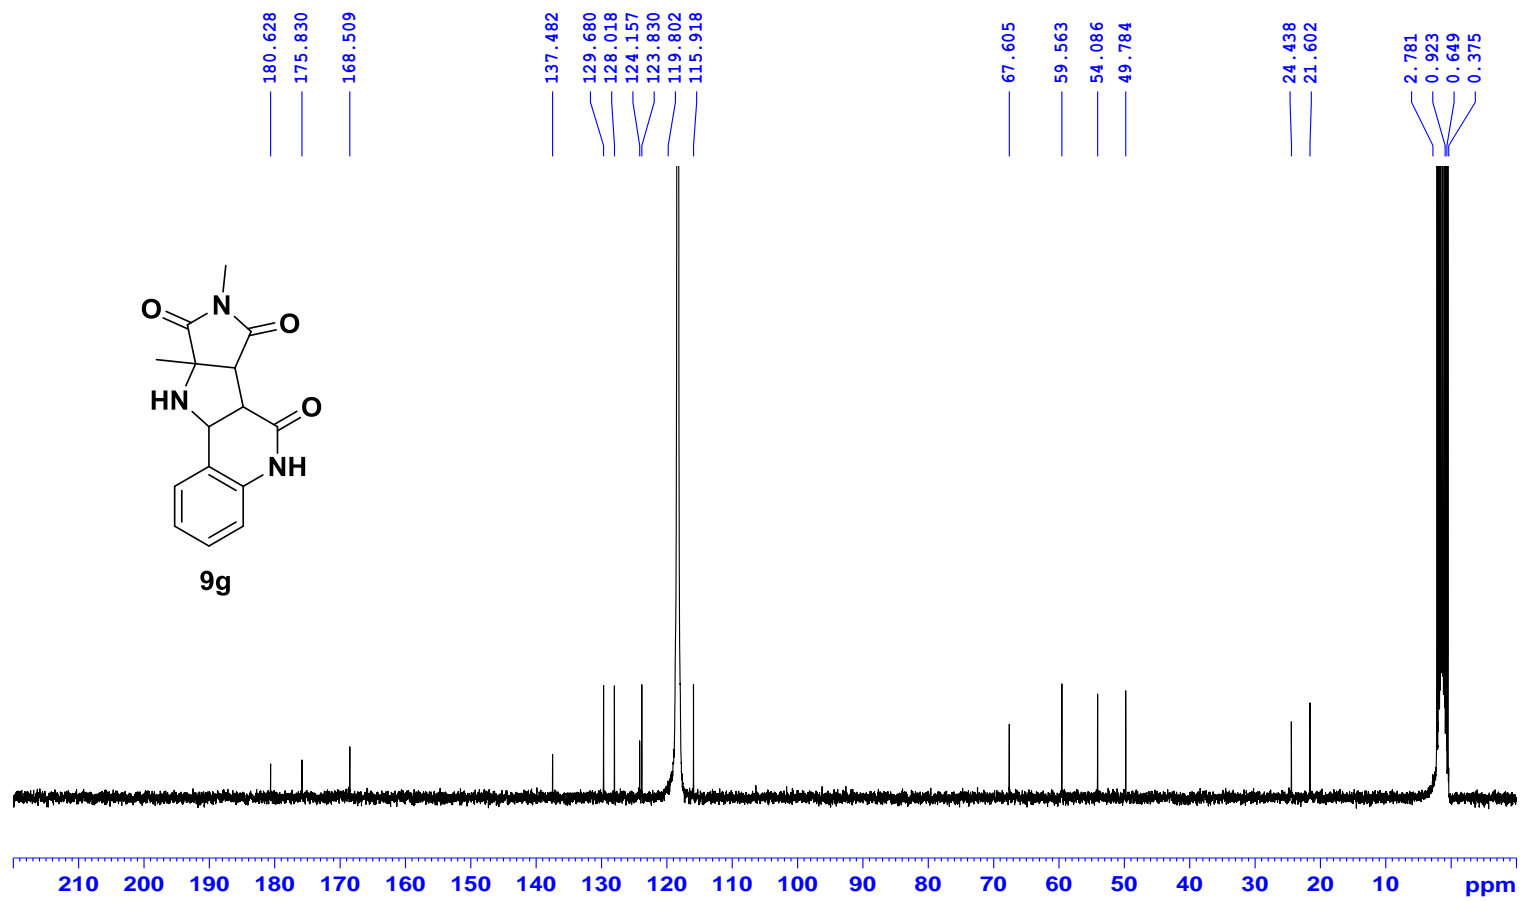

<sup>13</sup>C NMR spectrum (101 MHz) of compound **9g** in CD<sub>3</sub>CN

[ Elemental Composition ]

Data : 1001027-012

Date : 27-Oct-2011 10:33

Sample: leeut-FL07

Note : 285.11

Inlet : Direct

Ion Mode : EI+

RT : 0.86 min

Scan#: 26

Elements : C 15/0, H 40/0, N 3/0, O 3/0

Mass Tolerance : 10ppm, 5mmu if m/z < 500, 50mmu if m/z > 5000

Unsaturation (U.S.) : -0.5 - 200.0

| Observed m/z | Int% | Err[ppm / mmu] | U.S. | Composition       |
|--------------|------|----------------|------|-------------------|
| 285.1113     | 80.3 | -0.2 / +0.0    | 10.0 | C 15 H 15 N 3 O 3 |

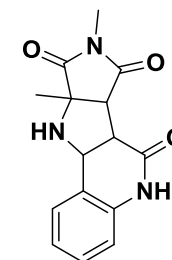

9g

HRMS (EI) of compound 9g

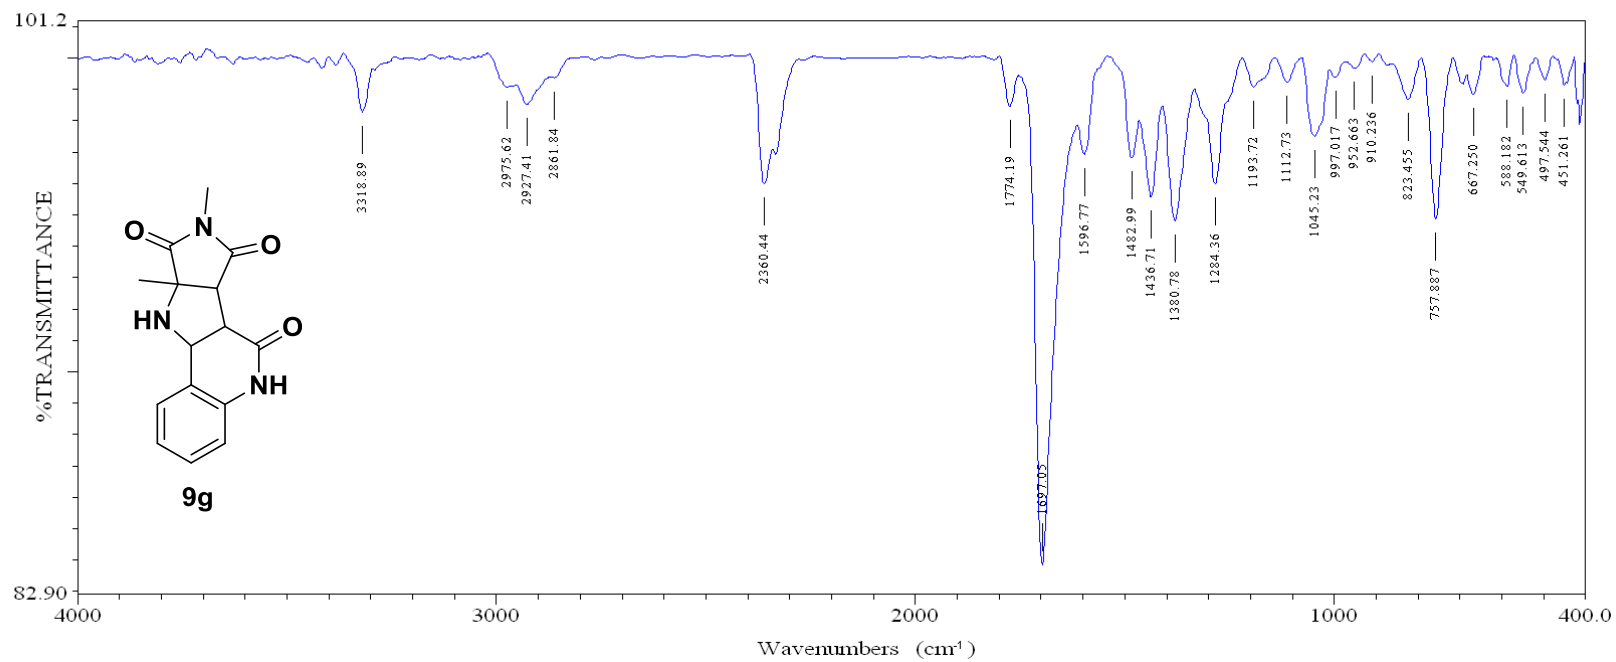

IR of compound **9g**

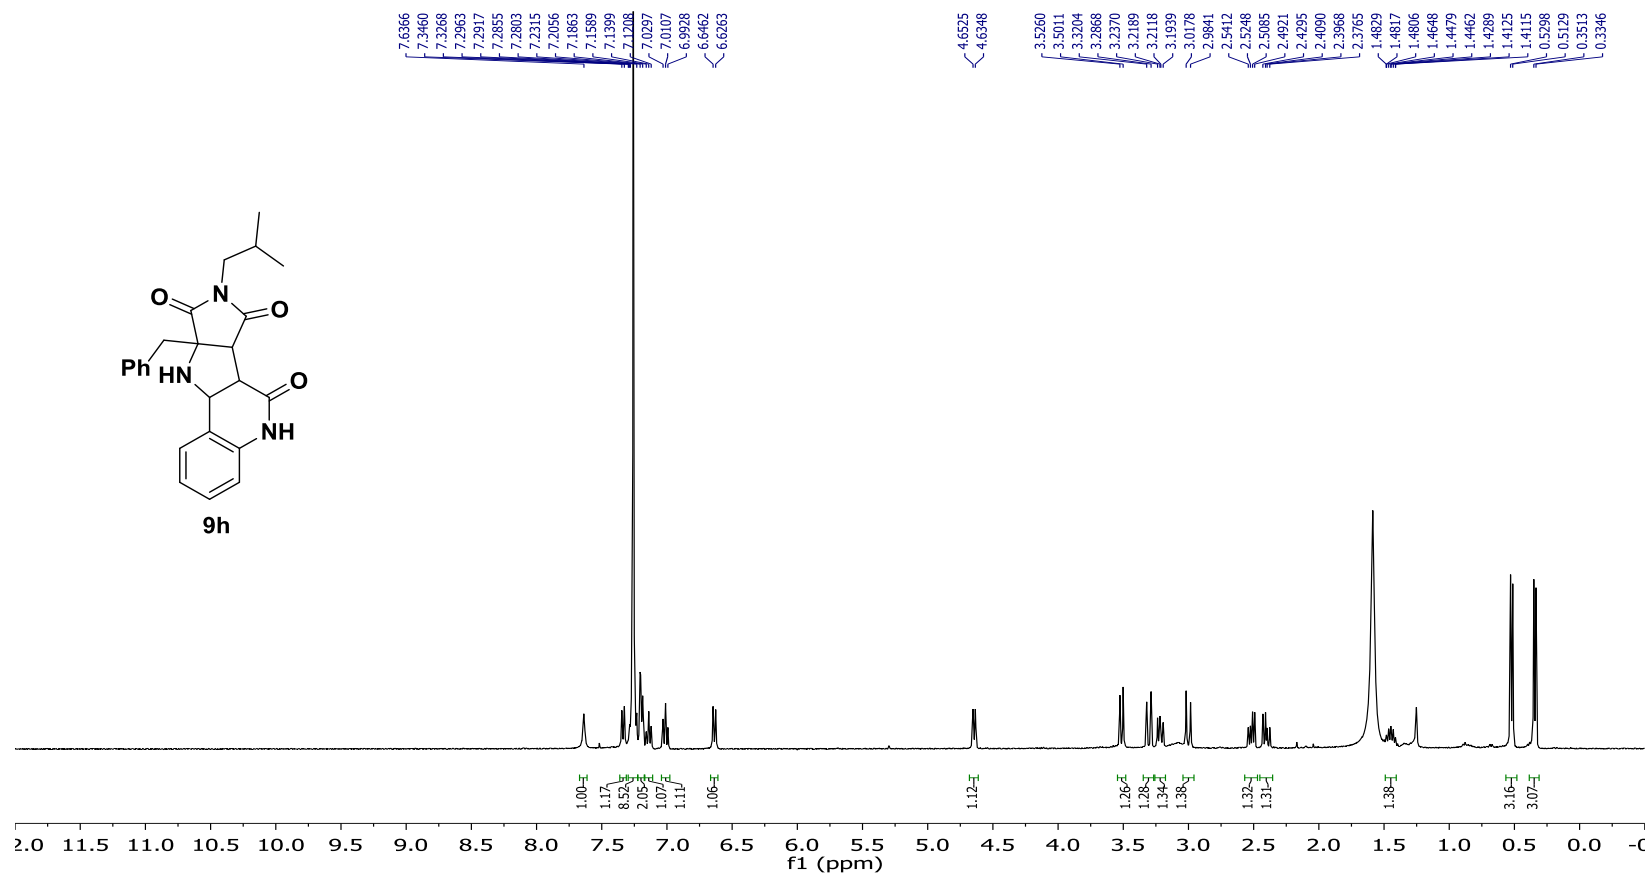

$^1\text{H}$  NMR spectrum (400 MHz) of compound **9h** in  $\text{CDCl}_3$

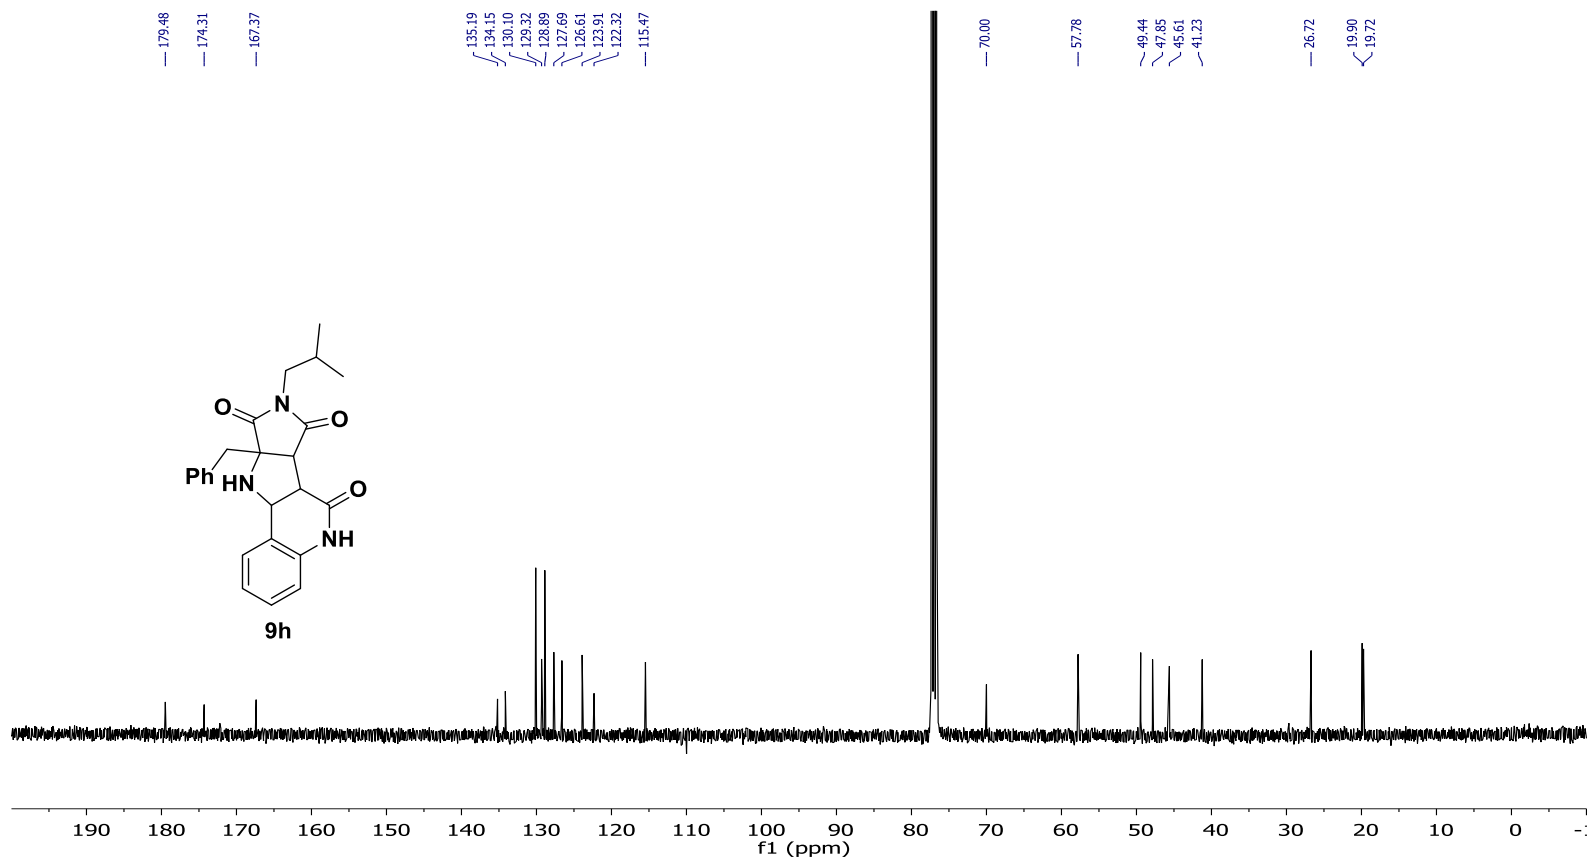

$^{13}\text{C}$  NMR spectrum (101 MHz) of compound **9h** in  $\text{CDCl}_3$

[ Elemental Composition ]

Data : 201111050

Date : 22-Oct-2011 17:30

Sample: leeut-E108

Note : -

Inlet : Direct

Ion Mode : EI+

RT : 0.87 min

Scan#: 43

Elements : C 24/0, H 25/0, O 5/0, N 3/0

Mass Tolerance : 1000ppm, 3mmu if m/z < 3, 5mmu if m/z > 5

Unsaturation (U.S.) : -0.1 - 36.0

| Observed m/z | Int% | Err [ppm / mmu] | U.S. Composition       |
|--------------|------|-----------------|------------------------|
| 403.1893     | 33.4 | -0.7 / -0.3     | 14.0 C 24 H 25 O 3 N 3 |

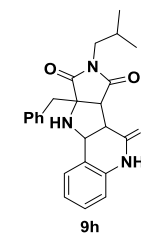

HRMS (EI) of compound 9h



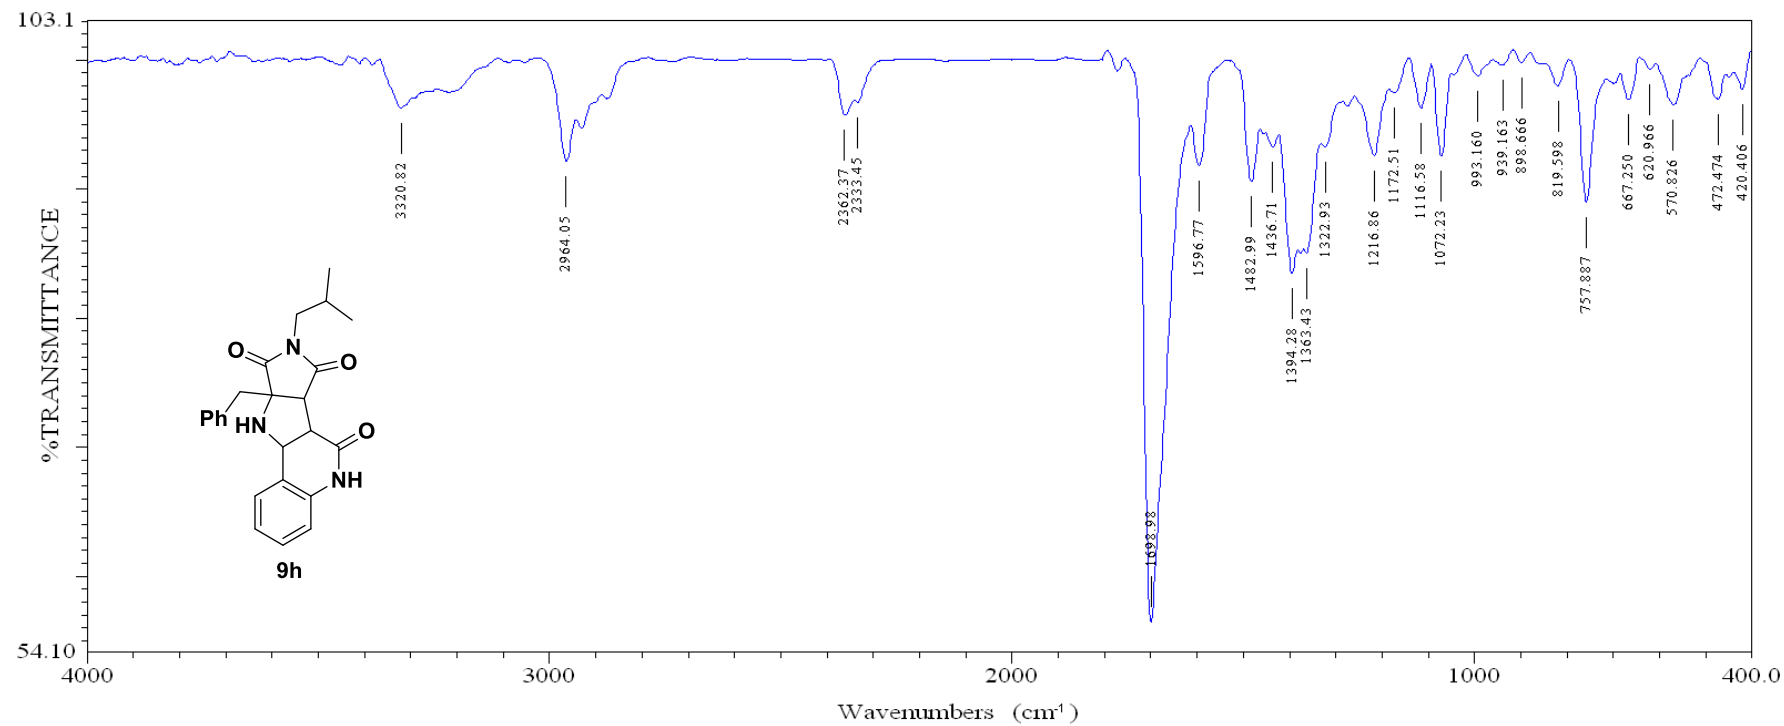

IR of compound **9h**

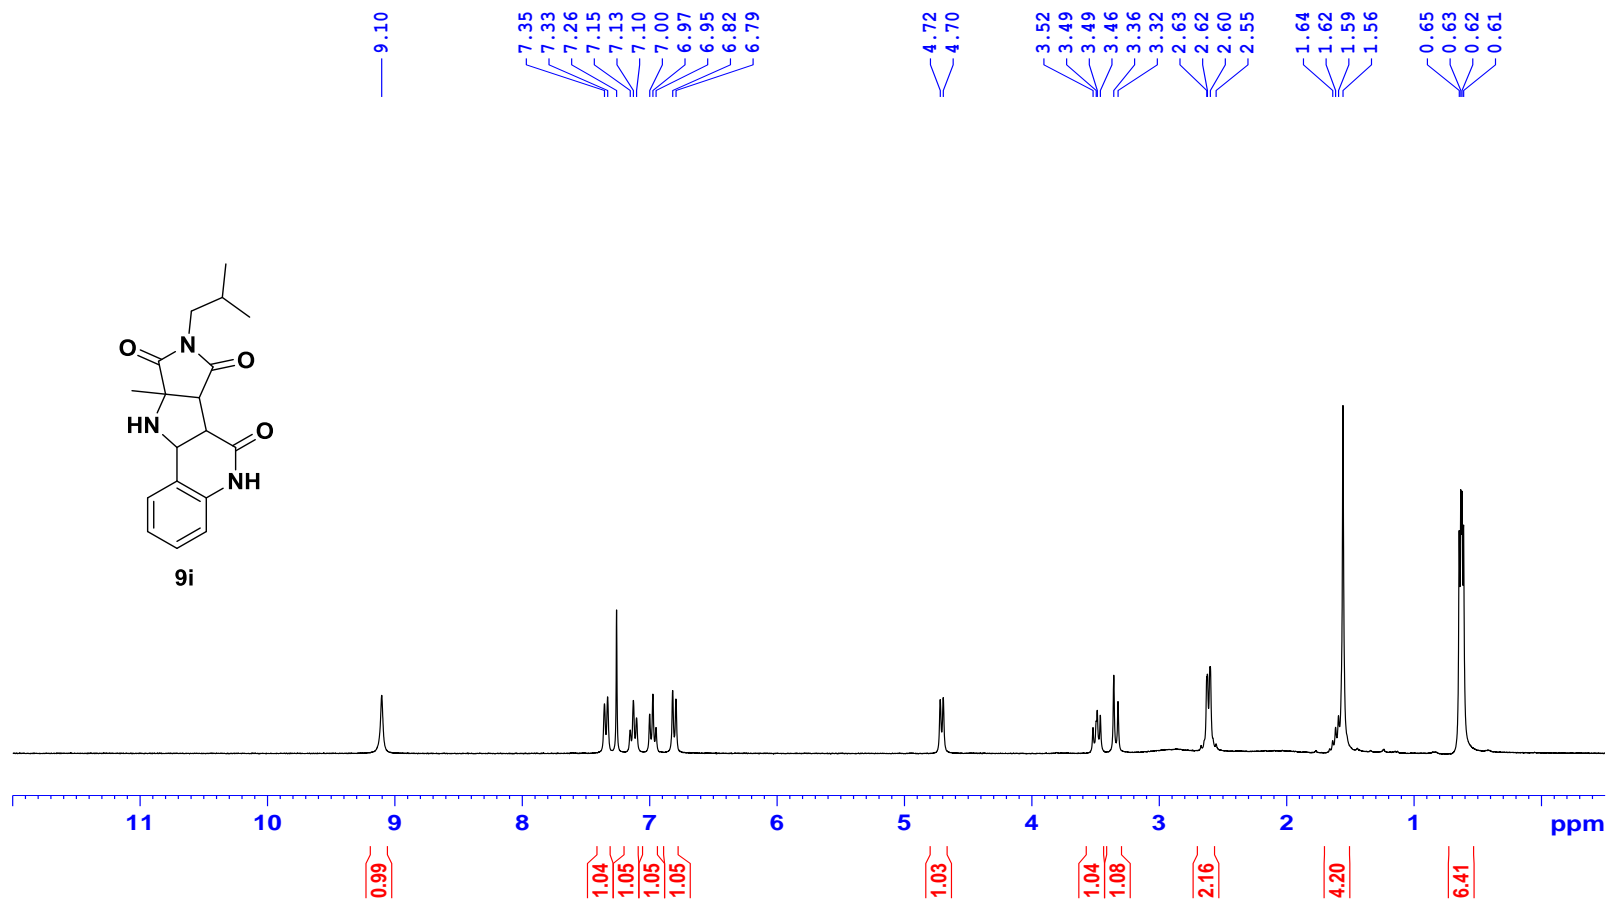

$^1\text{H}$  NMR spectrum (400 MHz) of compound **9i** in  $\text{CDCl}_3$

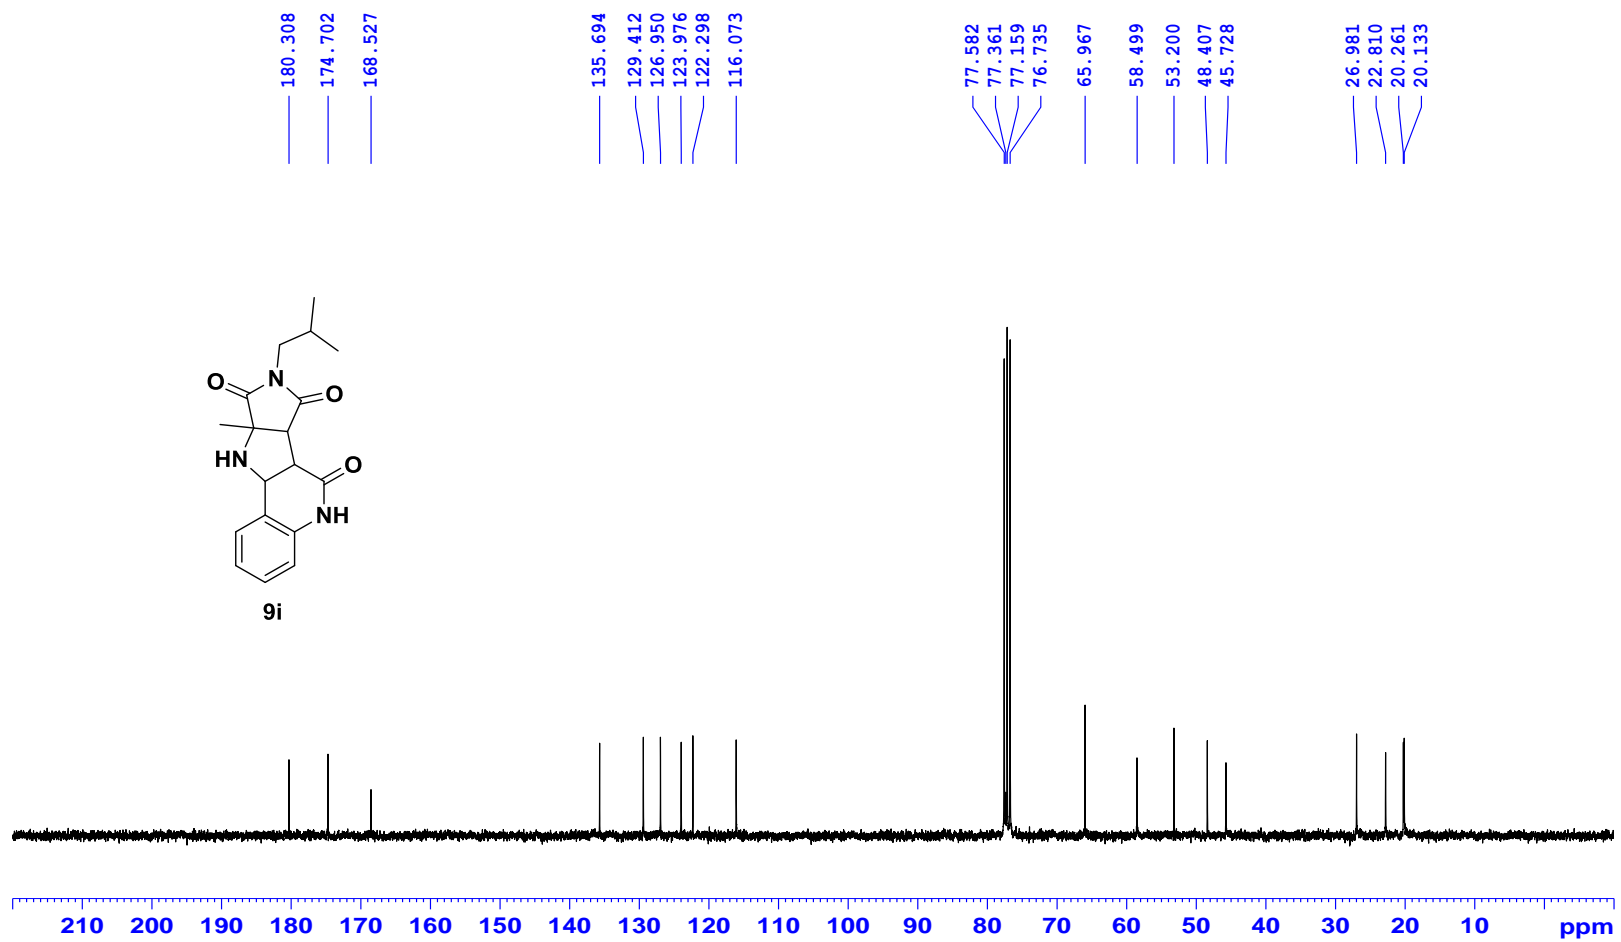

<sup>13</sup>C NMR spectrum (101 MHz) of compound **9i** in CDCl<sub>3</sub>

LIST: hei2109(leeutel9)-c2 07-Jun-11 REG : 03:13.9 #9  
 Samp: Start : 14:50:29 753  
 Mode: EI +VE +LMR ESCAN (EXP) UP HR NRM Inlet :  
 Oper:  
 Limit: ( 0)  
 : (377) C19.H43.N3.O4  
 Peak: 1000.00 mmu R+D: -2.0 > 60.0  
 Data: +/590>724 (CMASS : converted; CMASS : converted | CMASS : conve

| Mass     | Intensity | %RA    | Flags | Delta | R+D  | Composition   |
|----------|-----------|--------|-------|-------|------|---------------|
| 327.1579 | 3598620   | 100.00 | #     | 0.4   | 10.0 | C18.H21.N3.O3 |

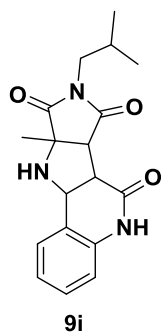

HRMS (EI) of compound 9i

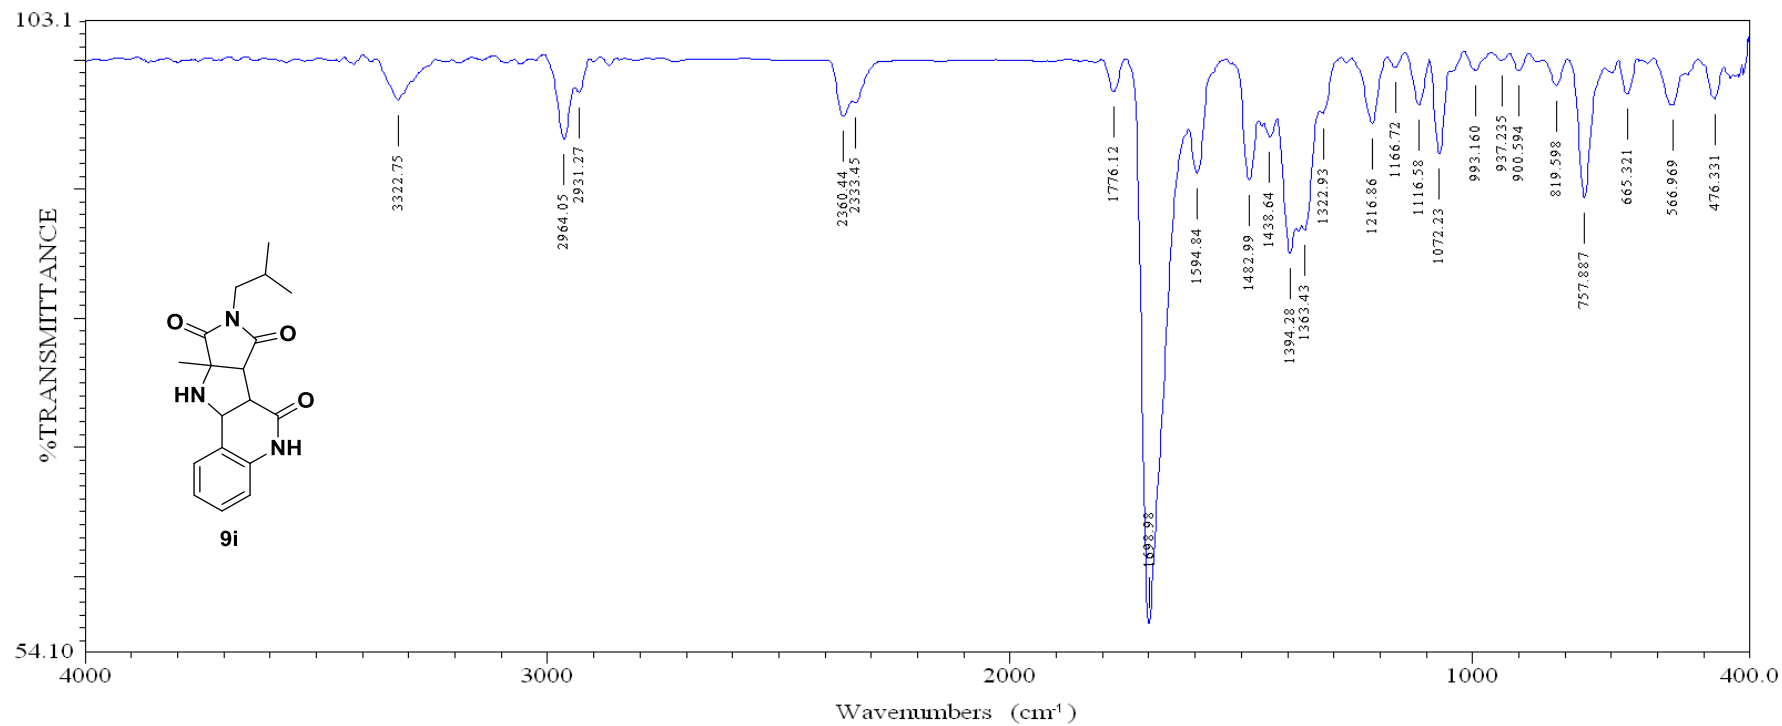

IR of compound **9i**

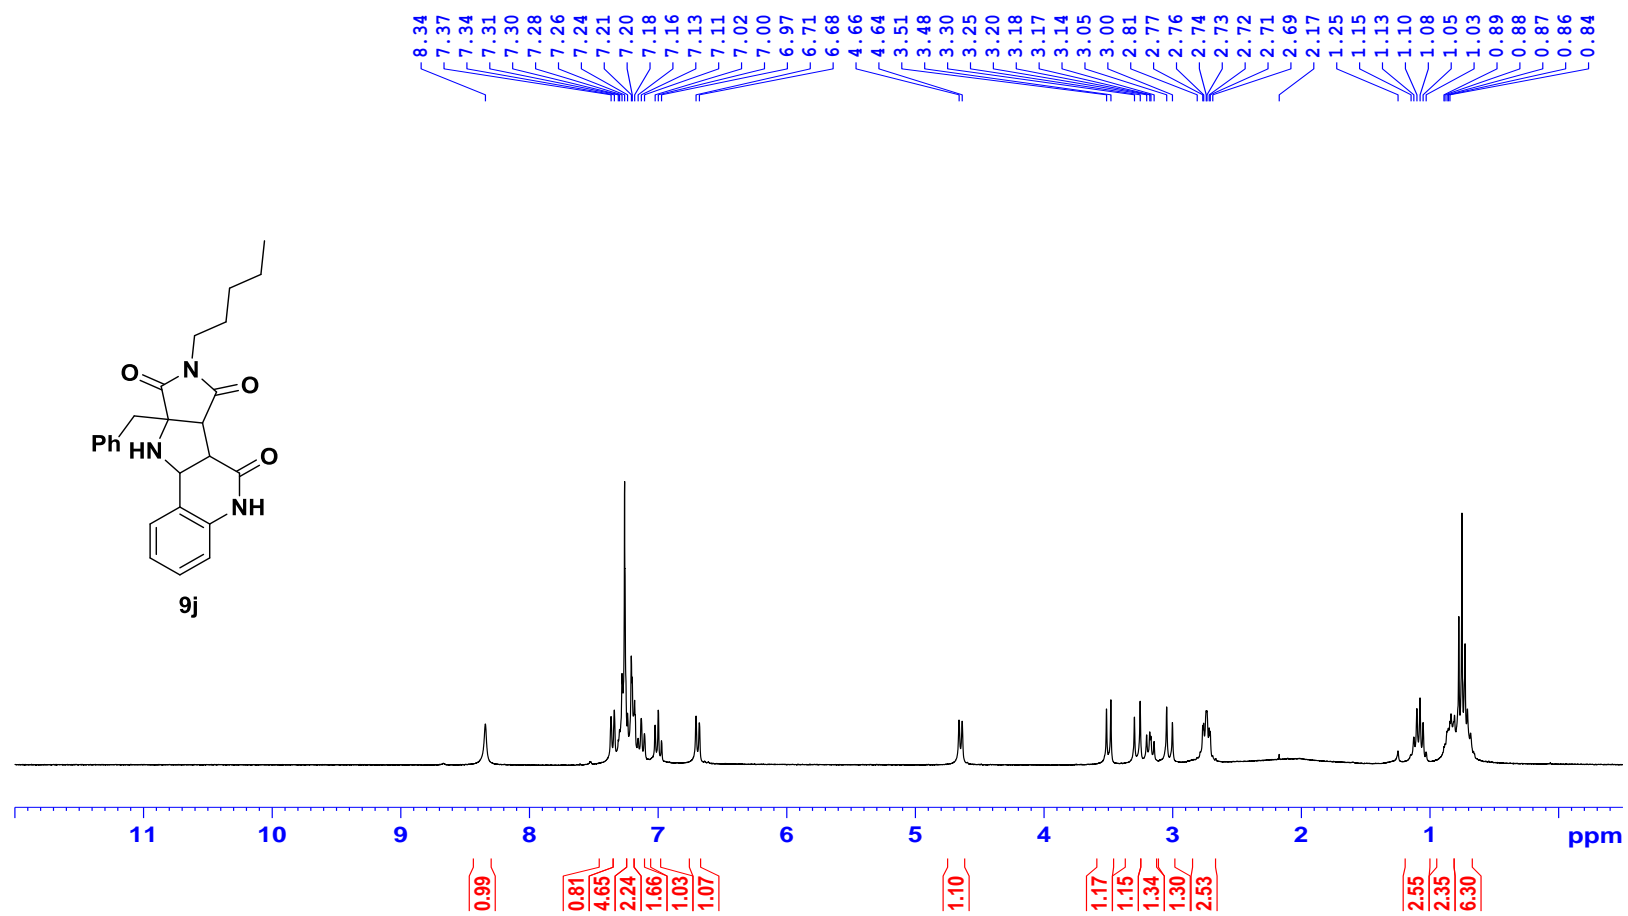

<sup>1</sup>H NMR spectrum (400 MHz) of compound **9j** in CDCl<sub>3</sub>

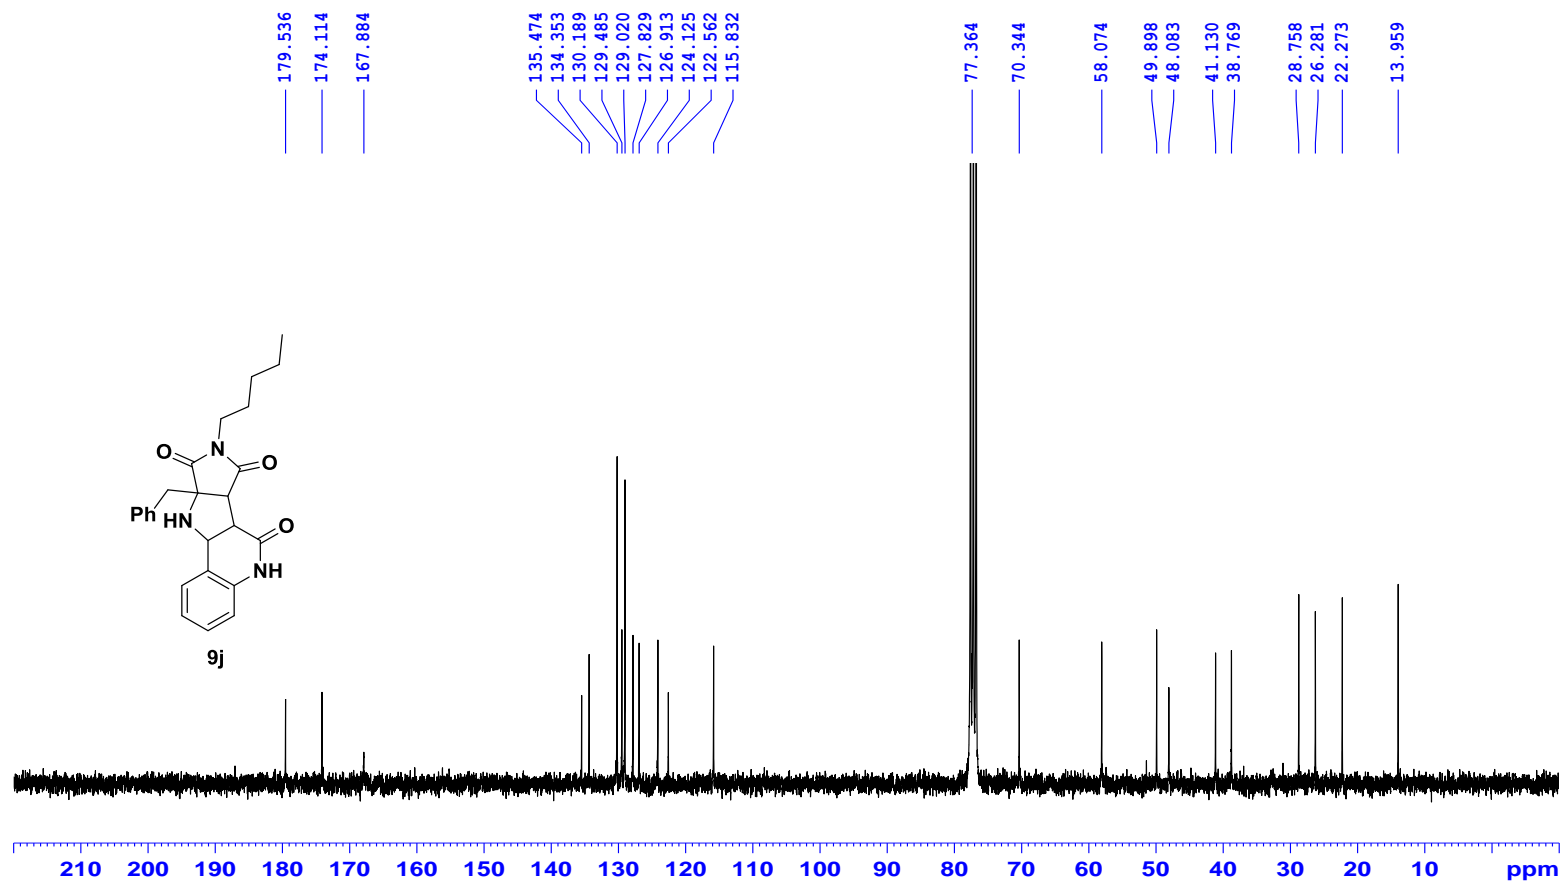

<sup>13</sup>C NMR spectrum (101 MHz) of compound **9j** in CDCl<sub>3</sub>

[ Elemental Composition ]

Data : 201111051

Date : 22-Oct-2011 17:38

Sample: leeut-E110

Note : -

Inlet : Direct

Ion Mode : EI+

RT : 0.86 min

Scan#: 39

Elements : C 25/0, H 27/0, O 5/0, N 3/0

Mass Tolerance : 1000ppm, 3mmu if m/z < 3, 5mmu if m/z > 5

Unsaturation (U.S.) : -0.1 - 36.0

| Observed m/z | Int%  | Err [ppm / mmu] | U.S. | Composition       |
|--------------|-------|-----------------|------|-------------------|
| 417.2050     | 100.0 | -0.5 / -0.2     | 14.0 | C 25 H 27 O 3 N 3 |

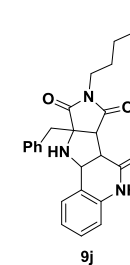

HRMS (EI) of compound 9j



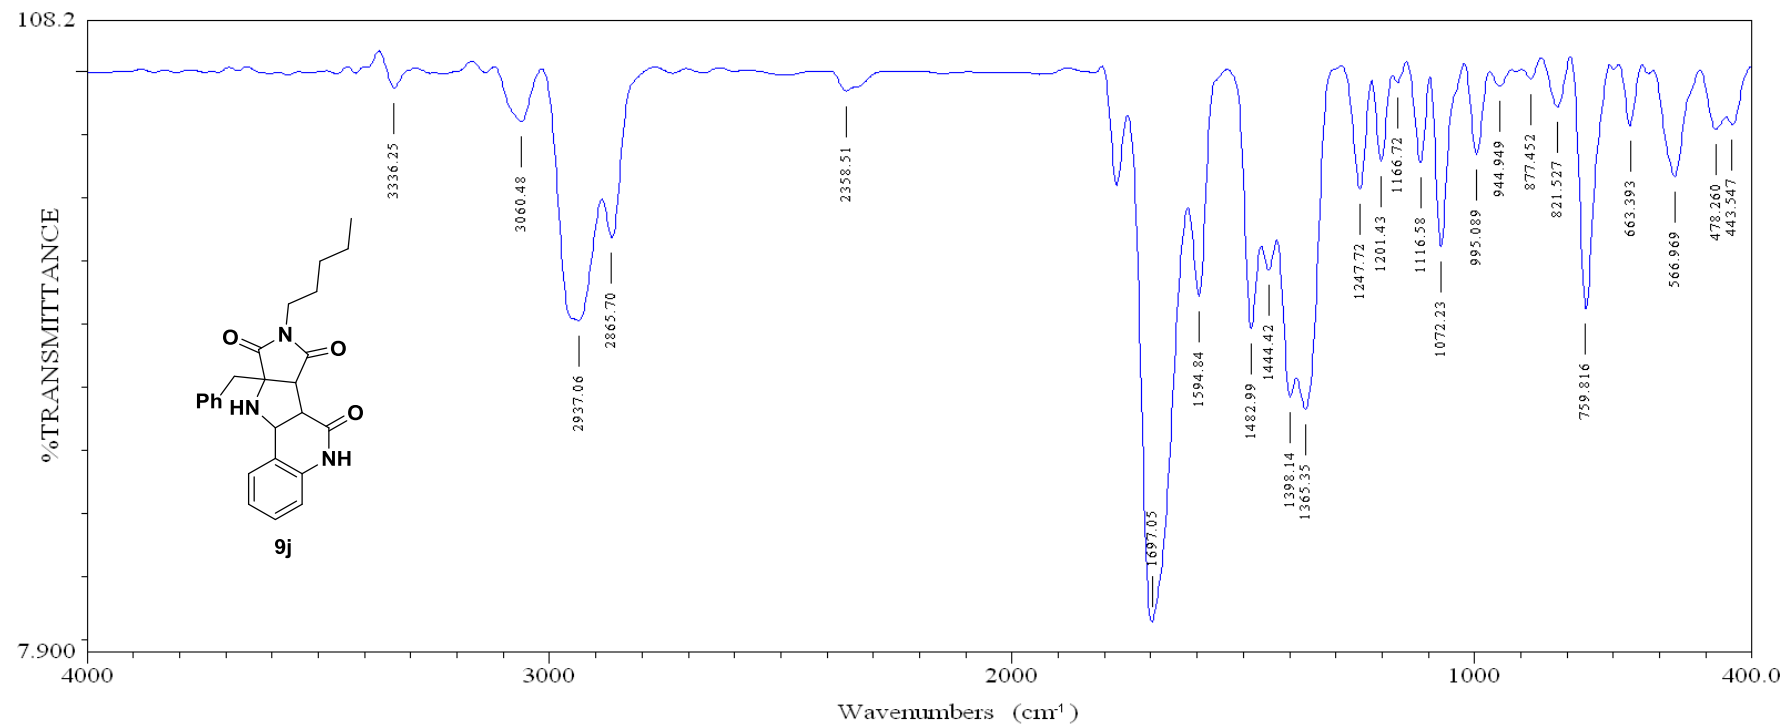

IR of compound **9j**

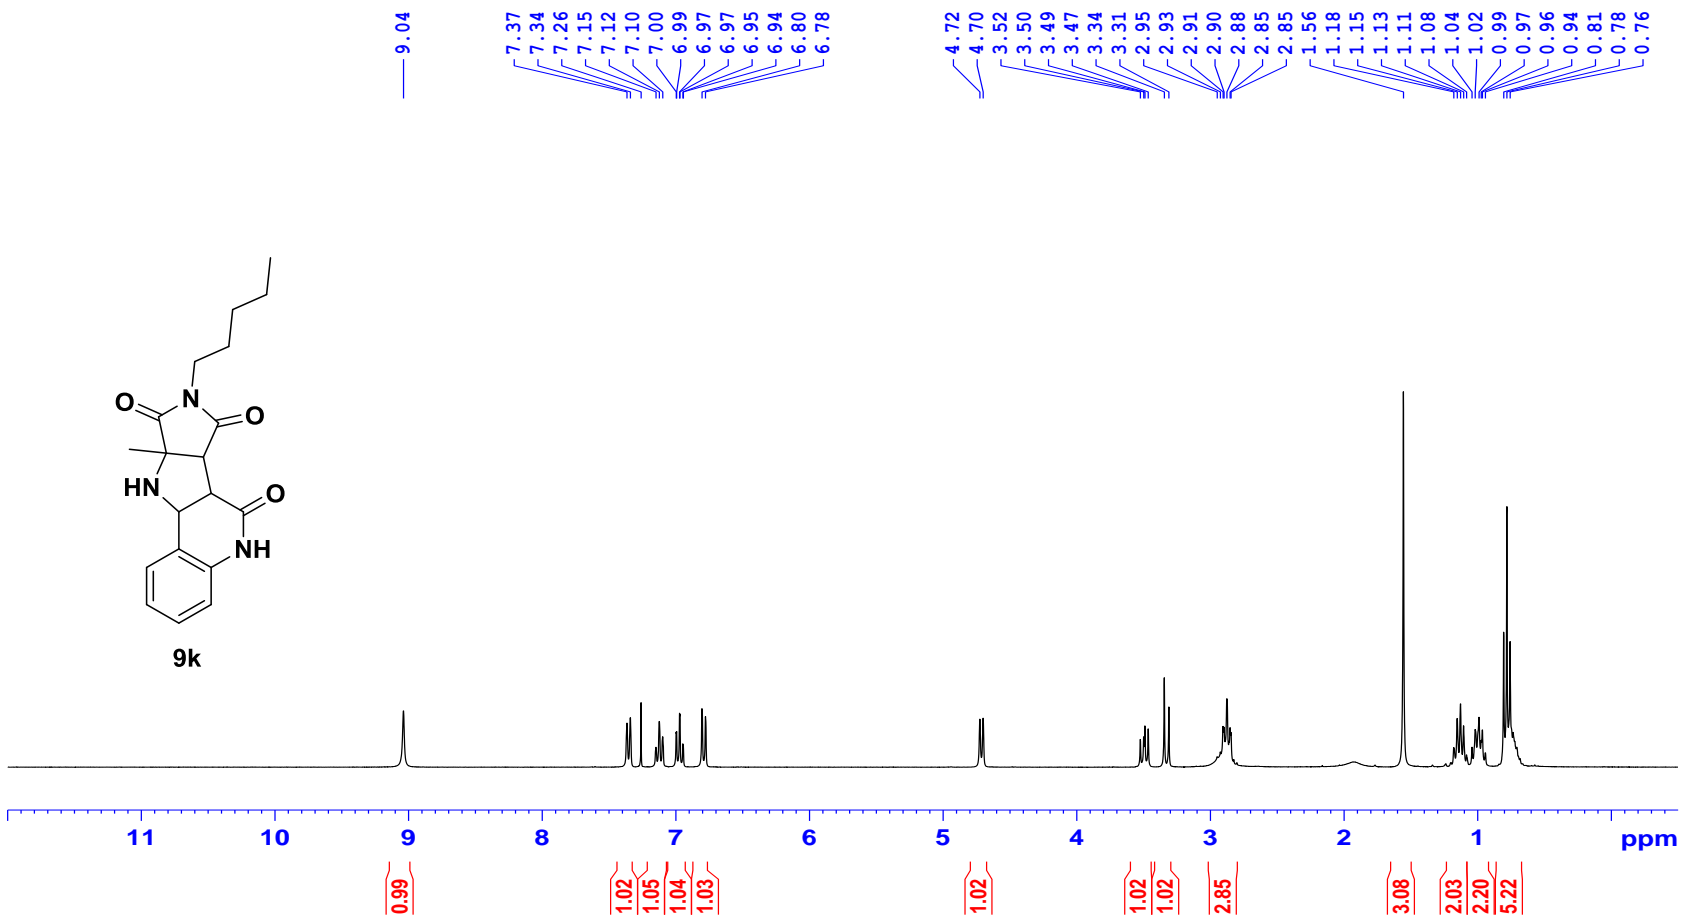

$^1\text{H}$  NMR spectrum (400 MHz) of compound **9k** in  $\text{CDCl}_3$

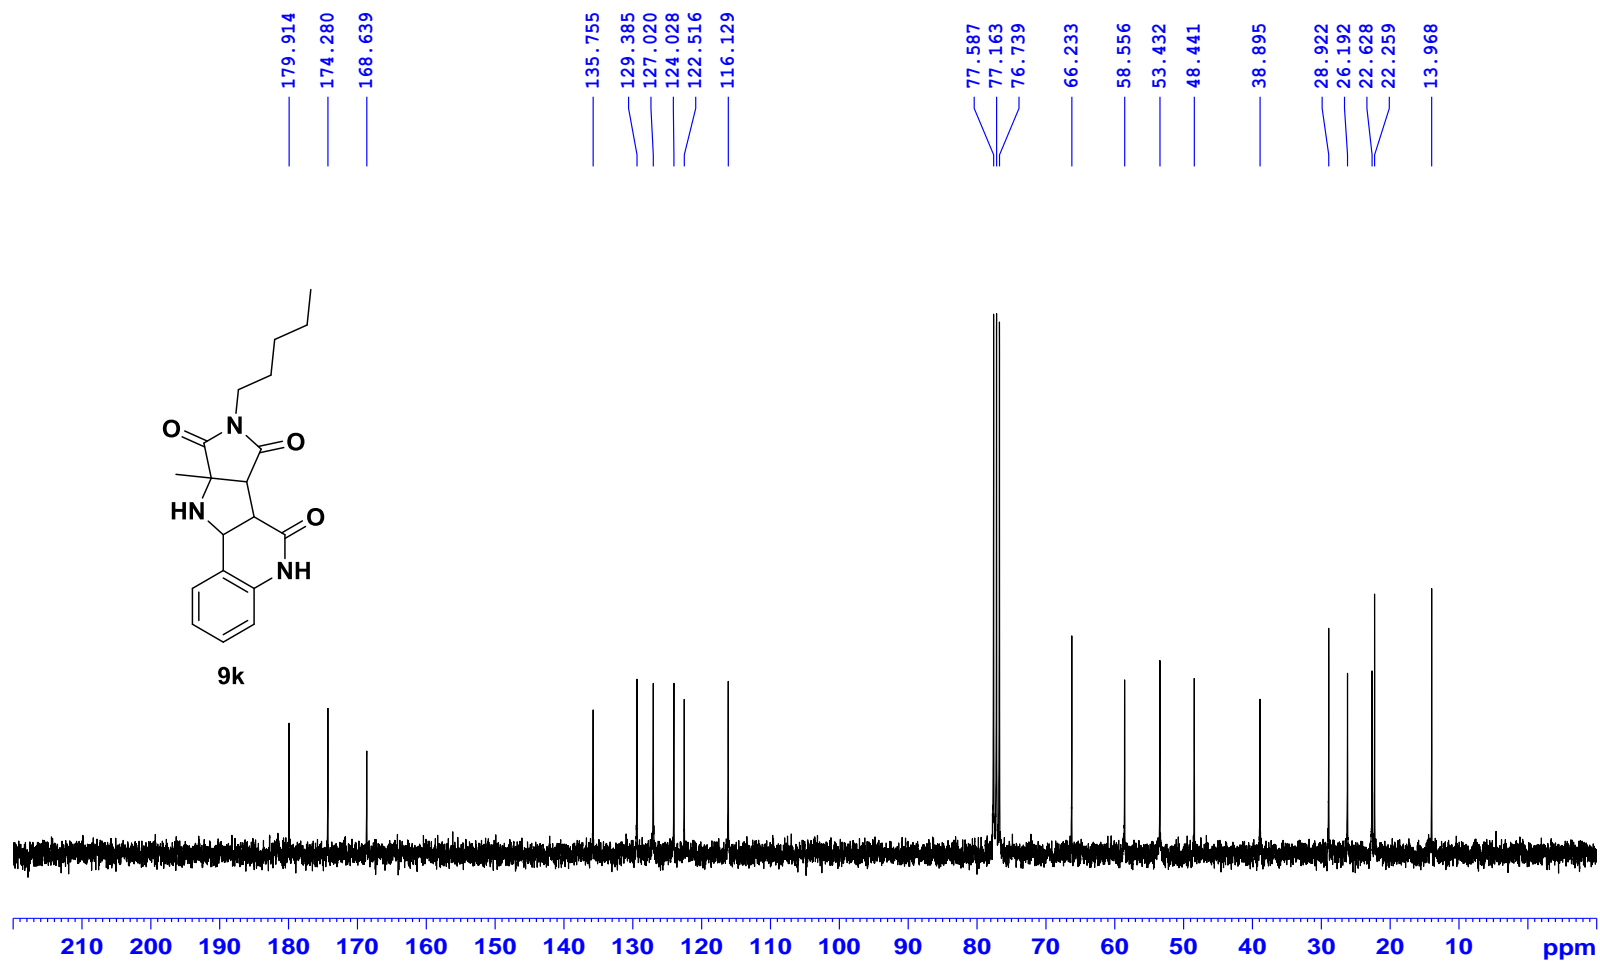

<sup>13</sup>C NMR spectrum (101 MHz) of compound **9k** in CDCl<sub>3</sub>



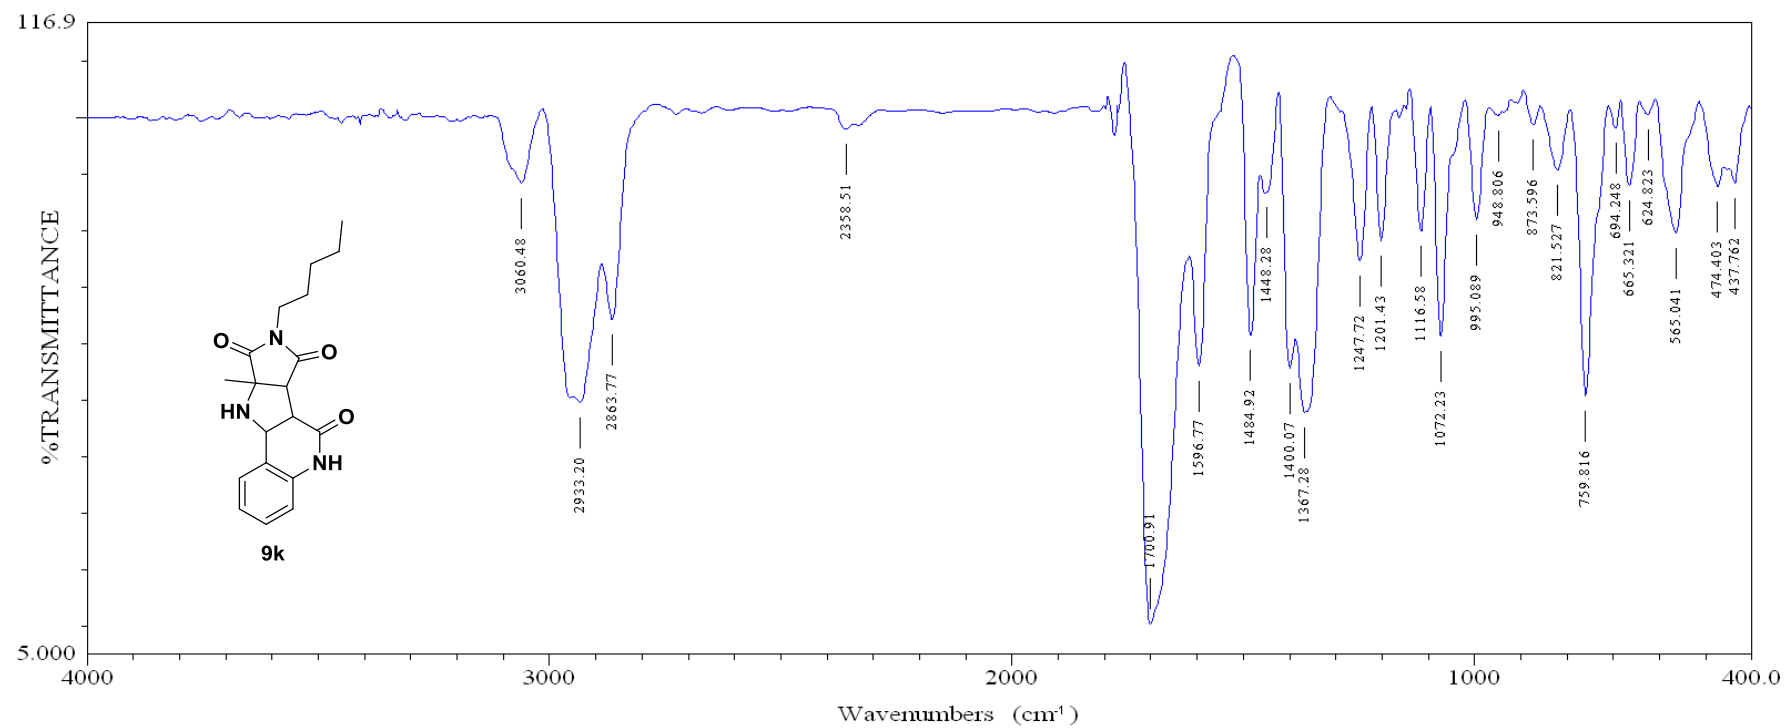

IR of compound **9k**

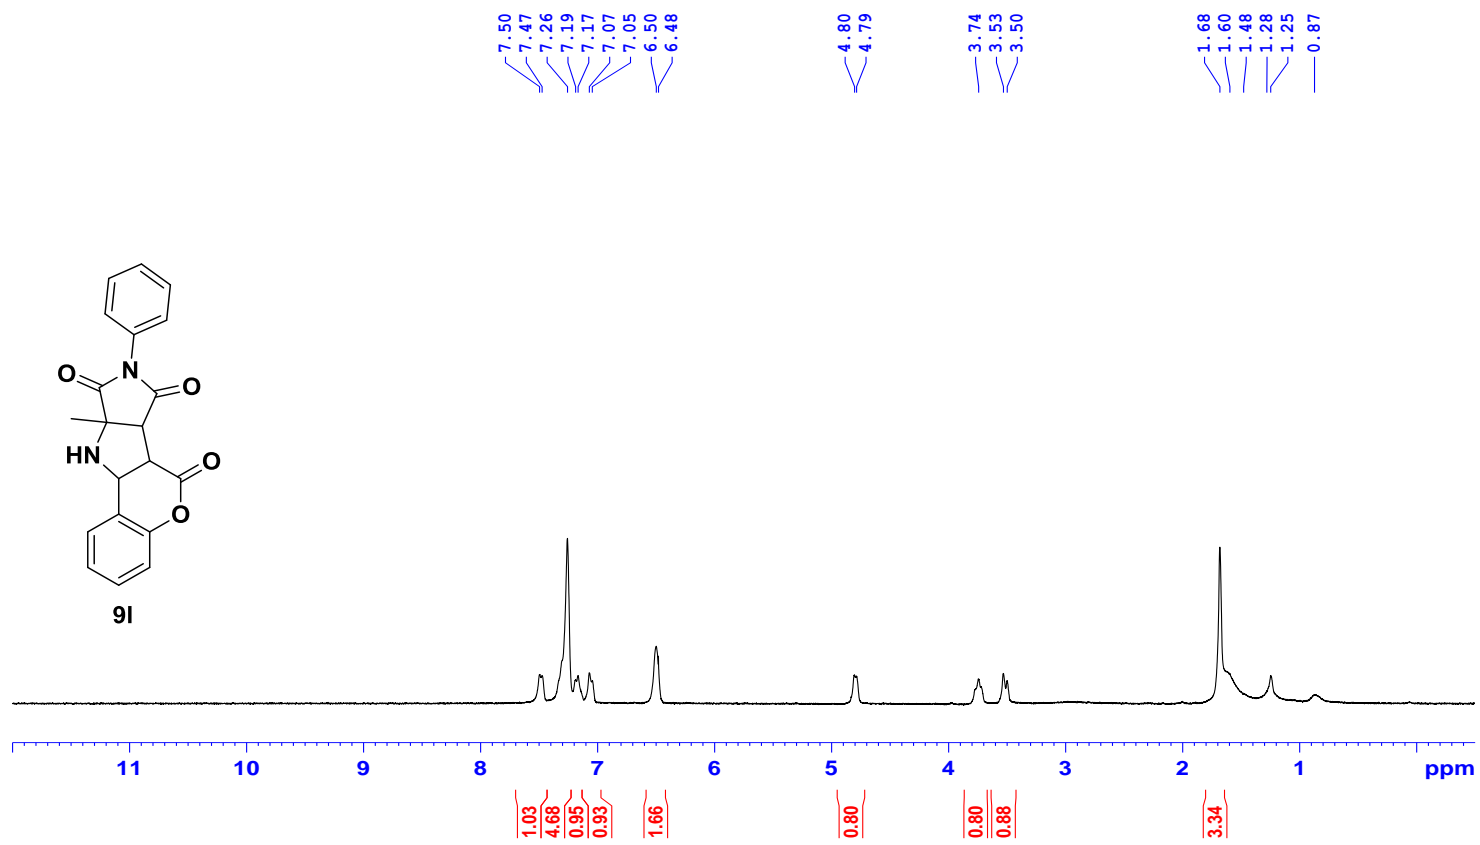

$^1\text{H}$  NMR spectrum (400 MHz) of compound **9I** in  $\text{CDCl}_3$

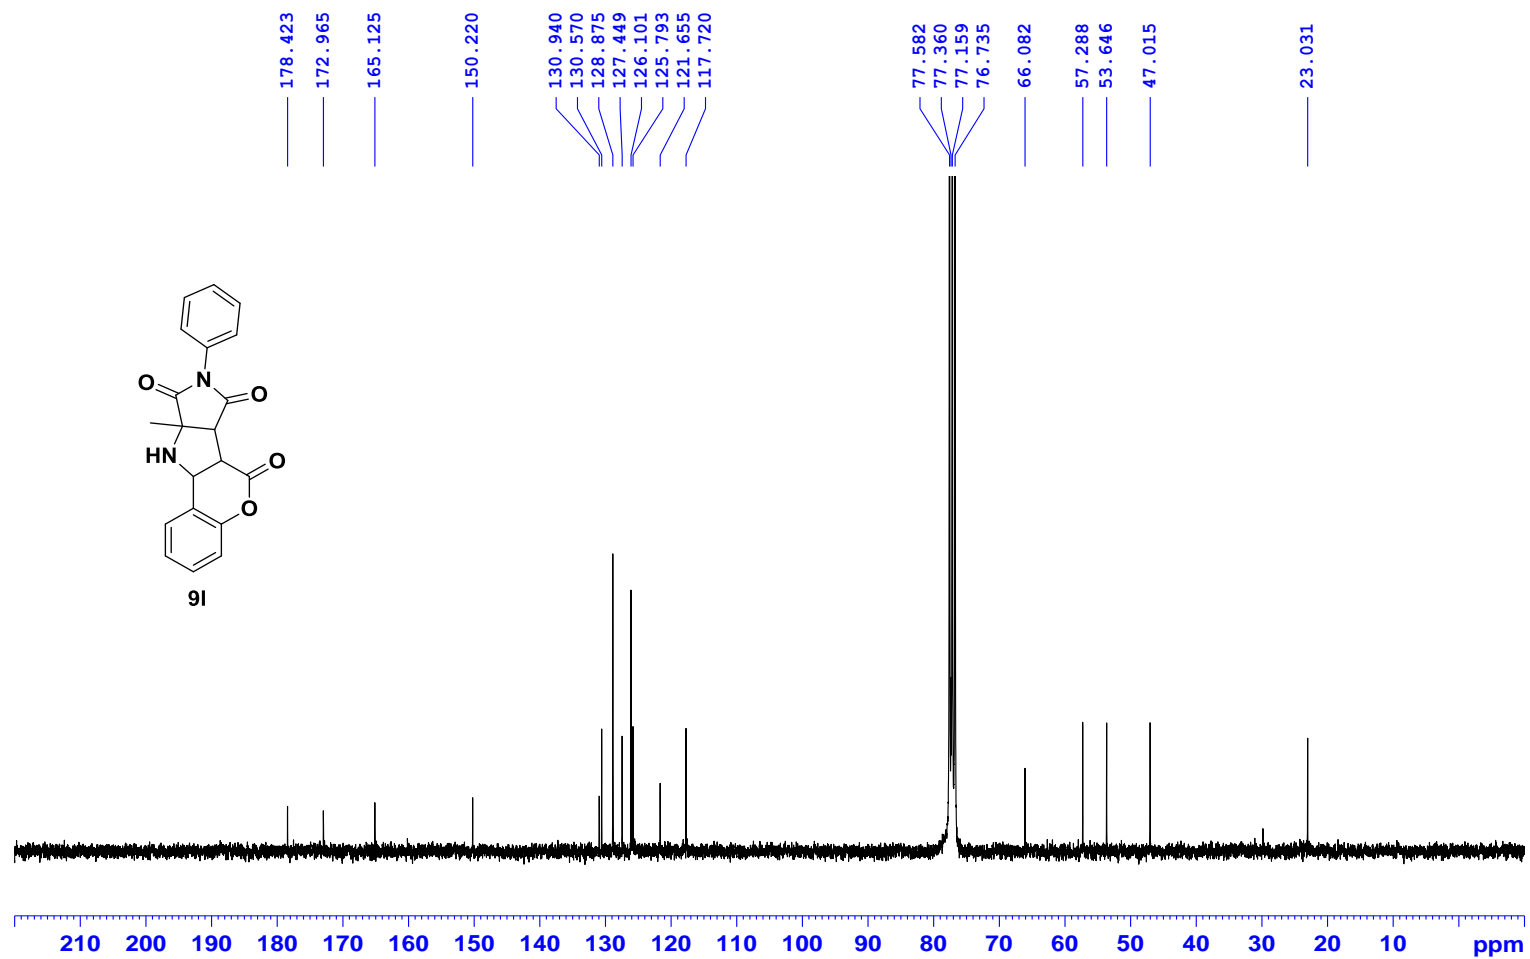

$^{13}\text{C}$  NMR spectrum (101 MHz) of compound **91** in  $\text{CDCl}_3$





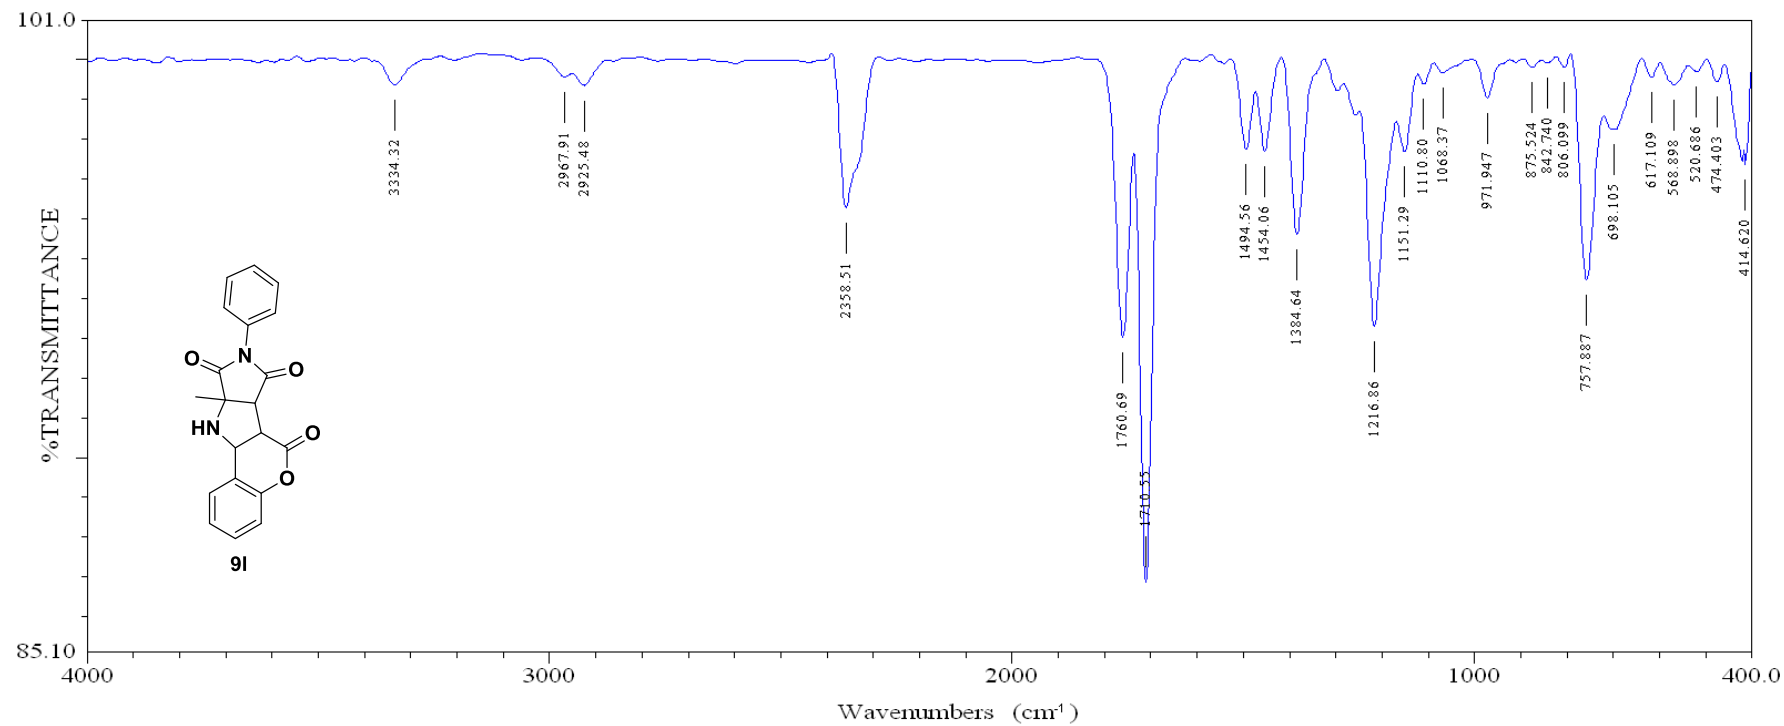

IR of compound **9l**

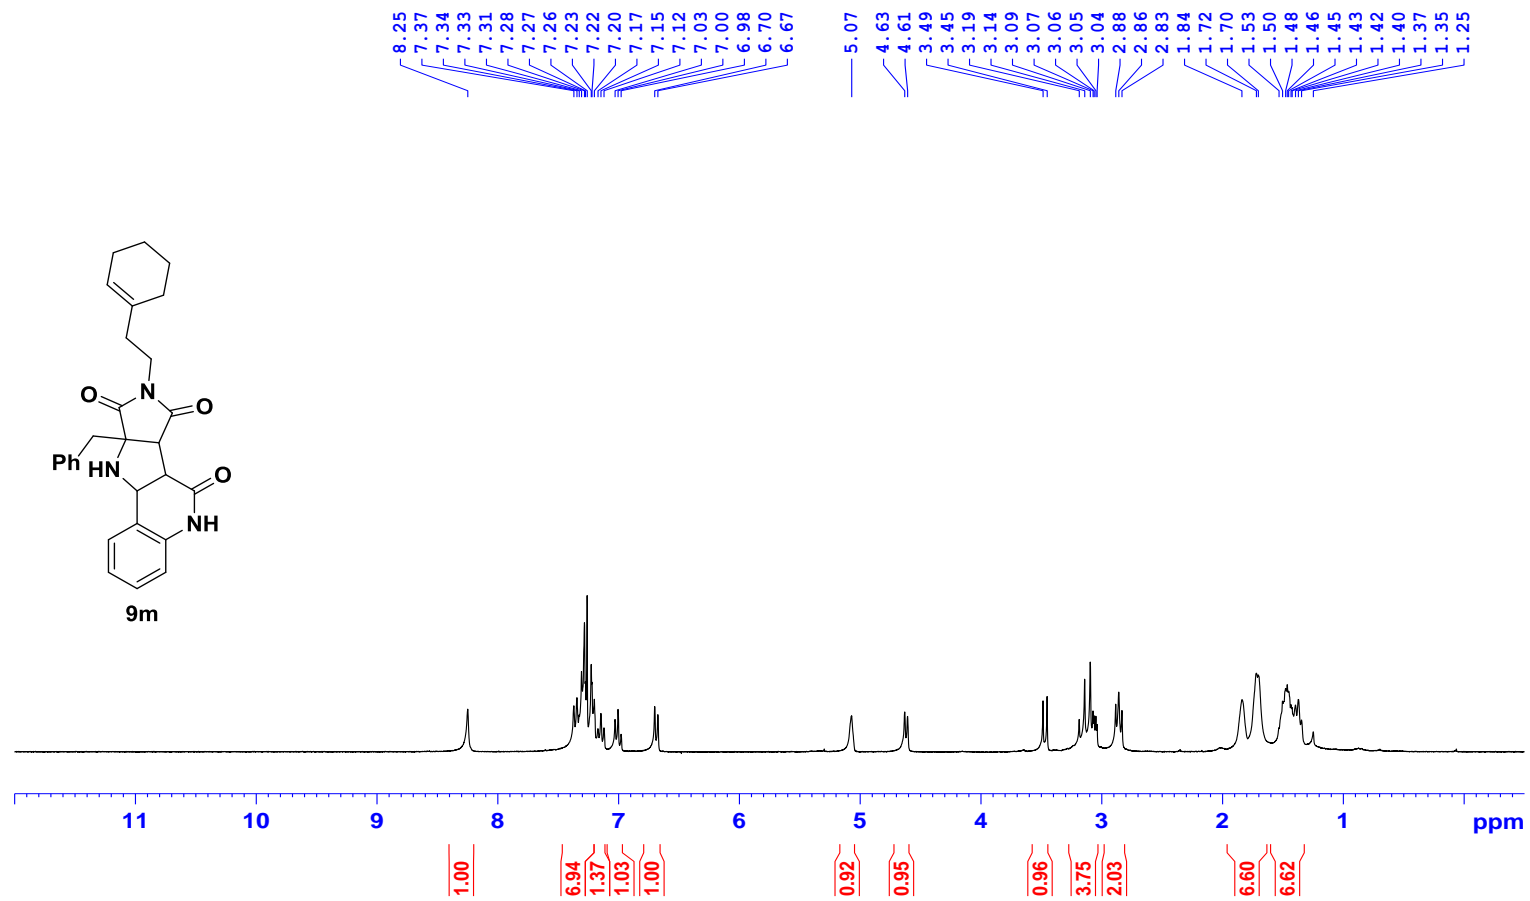

$^1\text{H}$  NMR spectrum (400 MHz) of compound **9m** in  $\text{CDCl}_3$

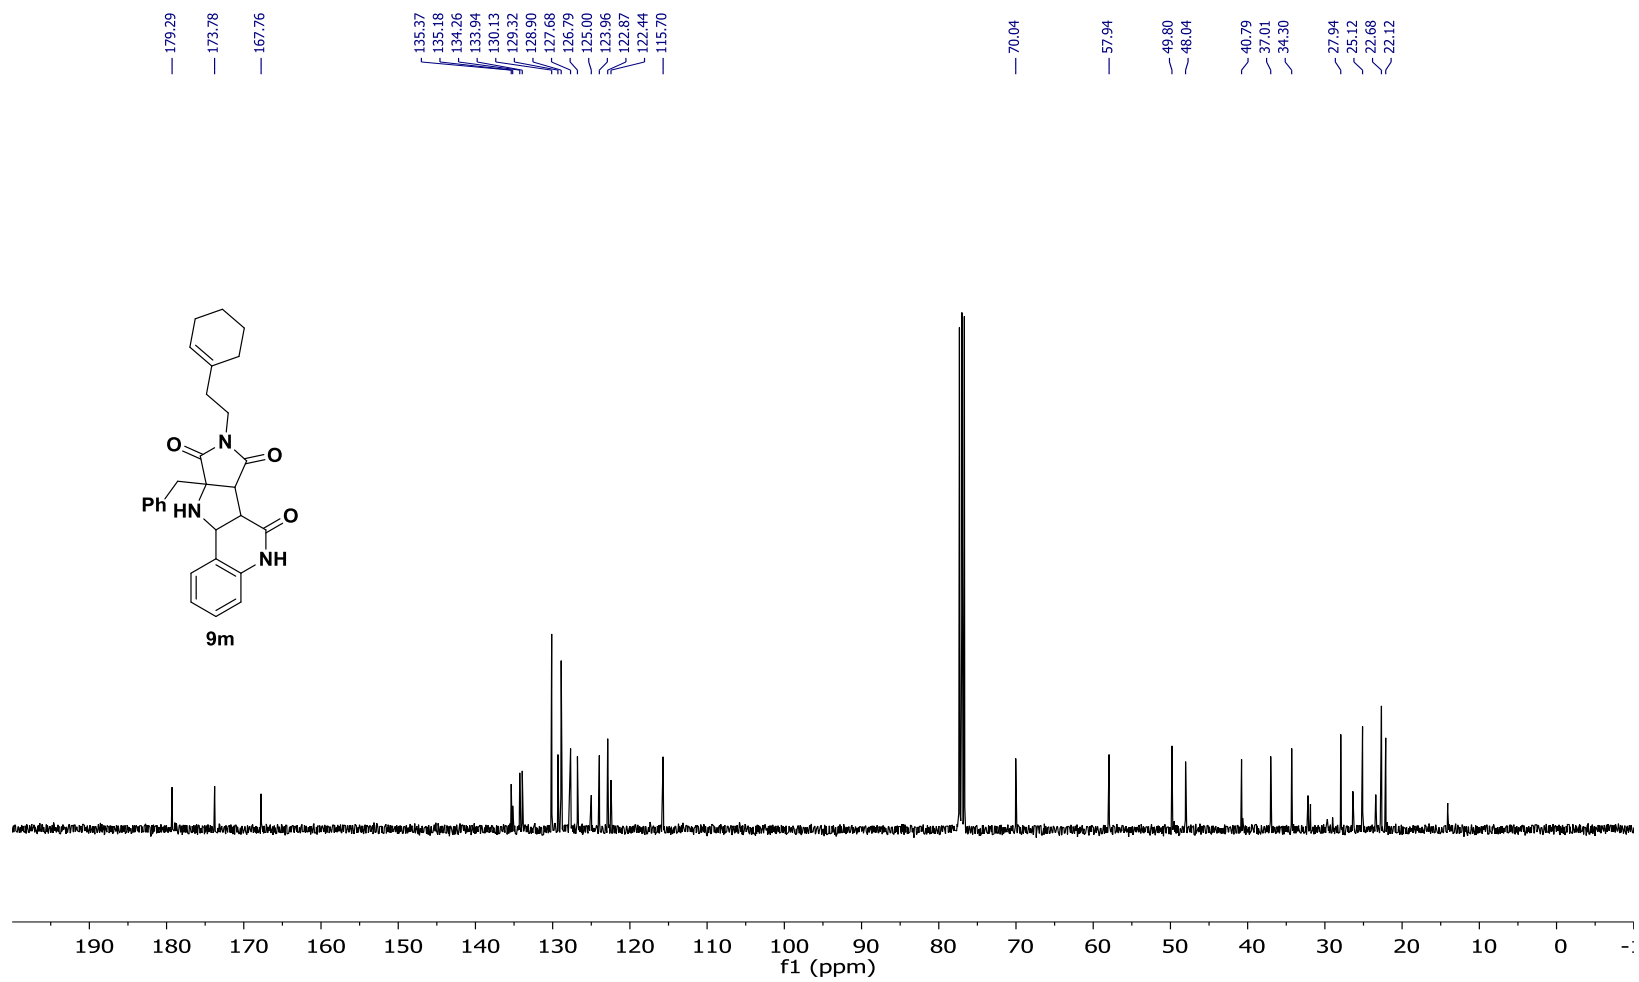

$^{13}\text{C}$  NMR spectrum (101 MHz) of compound **9m** in  $\text{CDCl}_3$

## [ Elemental Composition ]

Data : 1000512-012

Date : 12-May-2011 11:54

Sample: Leeut-EL13

Note : 455.55

Inlet : Direct

Ion Mode : EI+

RT : 0.81 min

Scan#: 56

Elements : C 28/0, H 36/0, N 3/0, O 3/0

Mass Tolerance : 10ppm, 3mmu if m/z &lt; 300, 20mmu if m/z &gt; 2000

Unsaturation (U.S.) : -0.5 - 200.0

| Observed m/z | Int%  | Err [ppm / mmu] | U.S. | Composition       |
|--------------|-------|-----------------|------|-------------------|
| 455.2213     | 100.0 | +0.9 / +0.4     | 16.0 | C 28 H 29 N 3 O 3 |

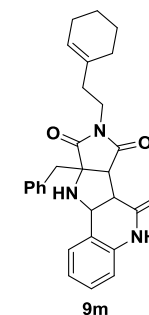HRMS (EI) of compound **9m**

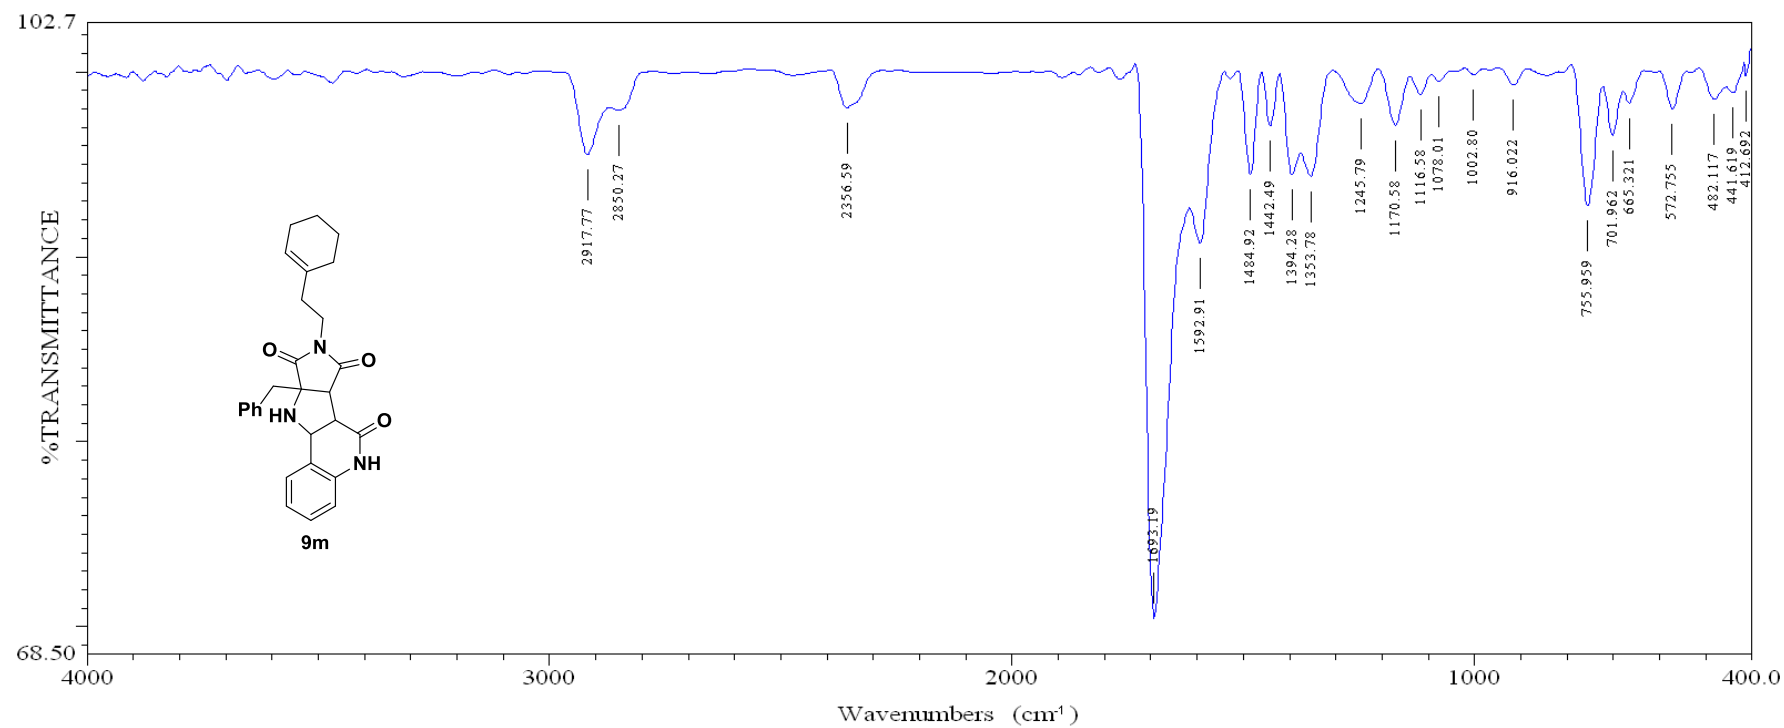

IR spectrum of compound **9m**

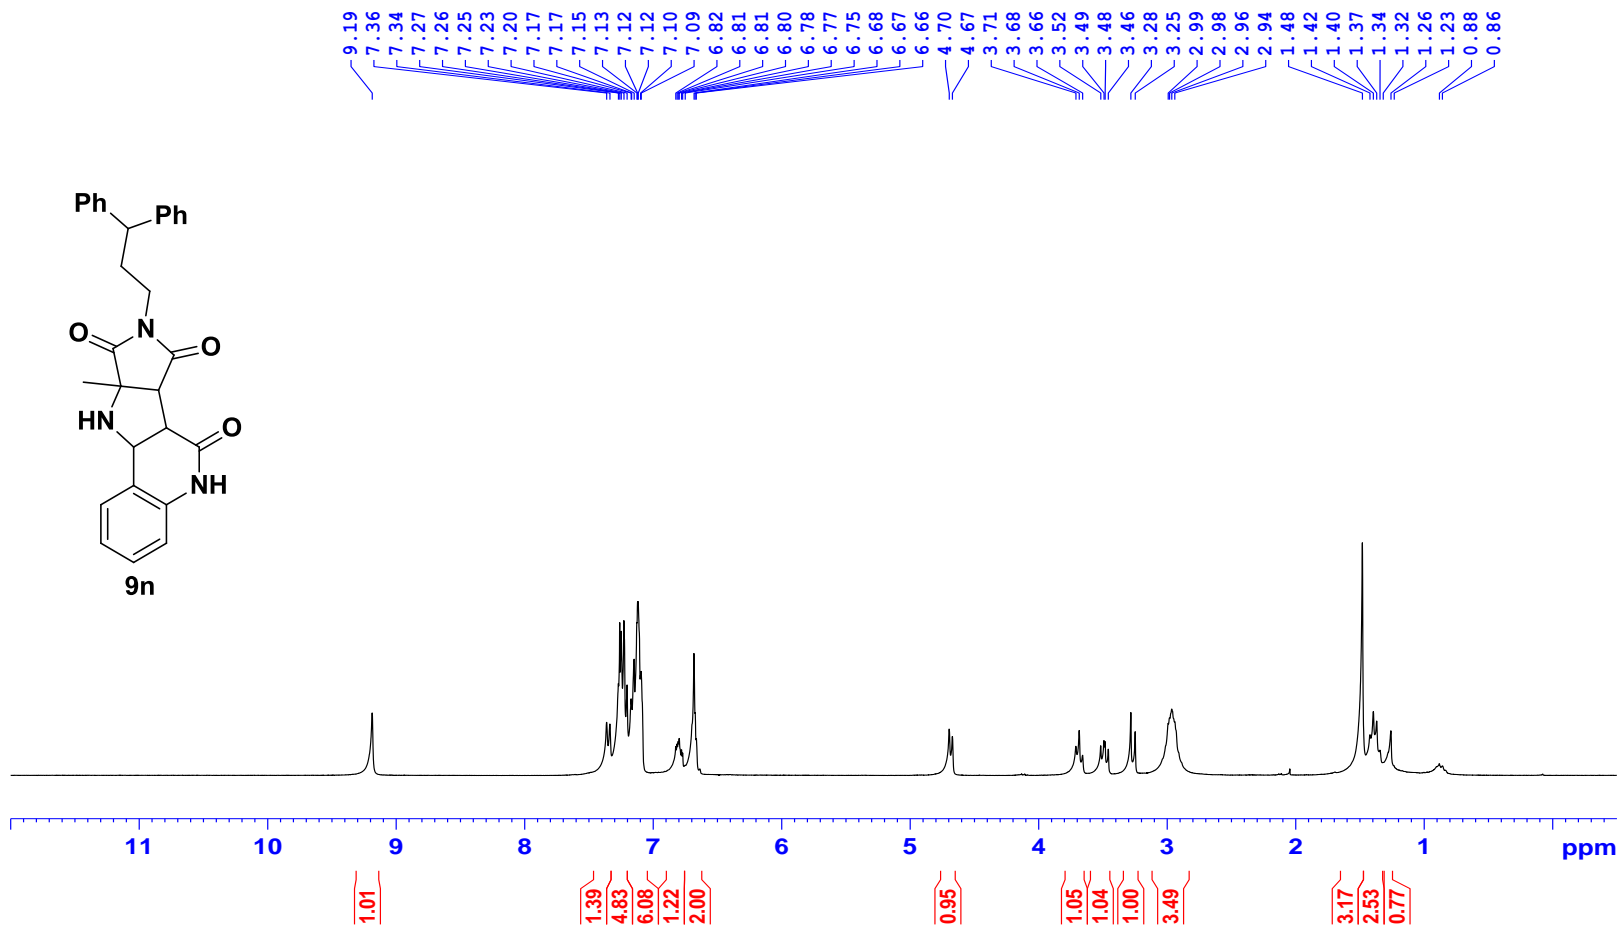

$^1\text{H}$  NMR spectrum (400 MHz) of compound **9n** in  $\text{CDCl}_3$

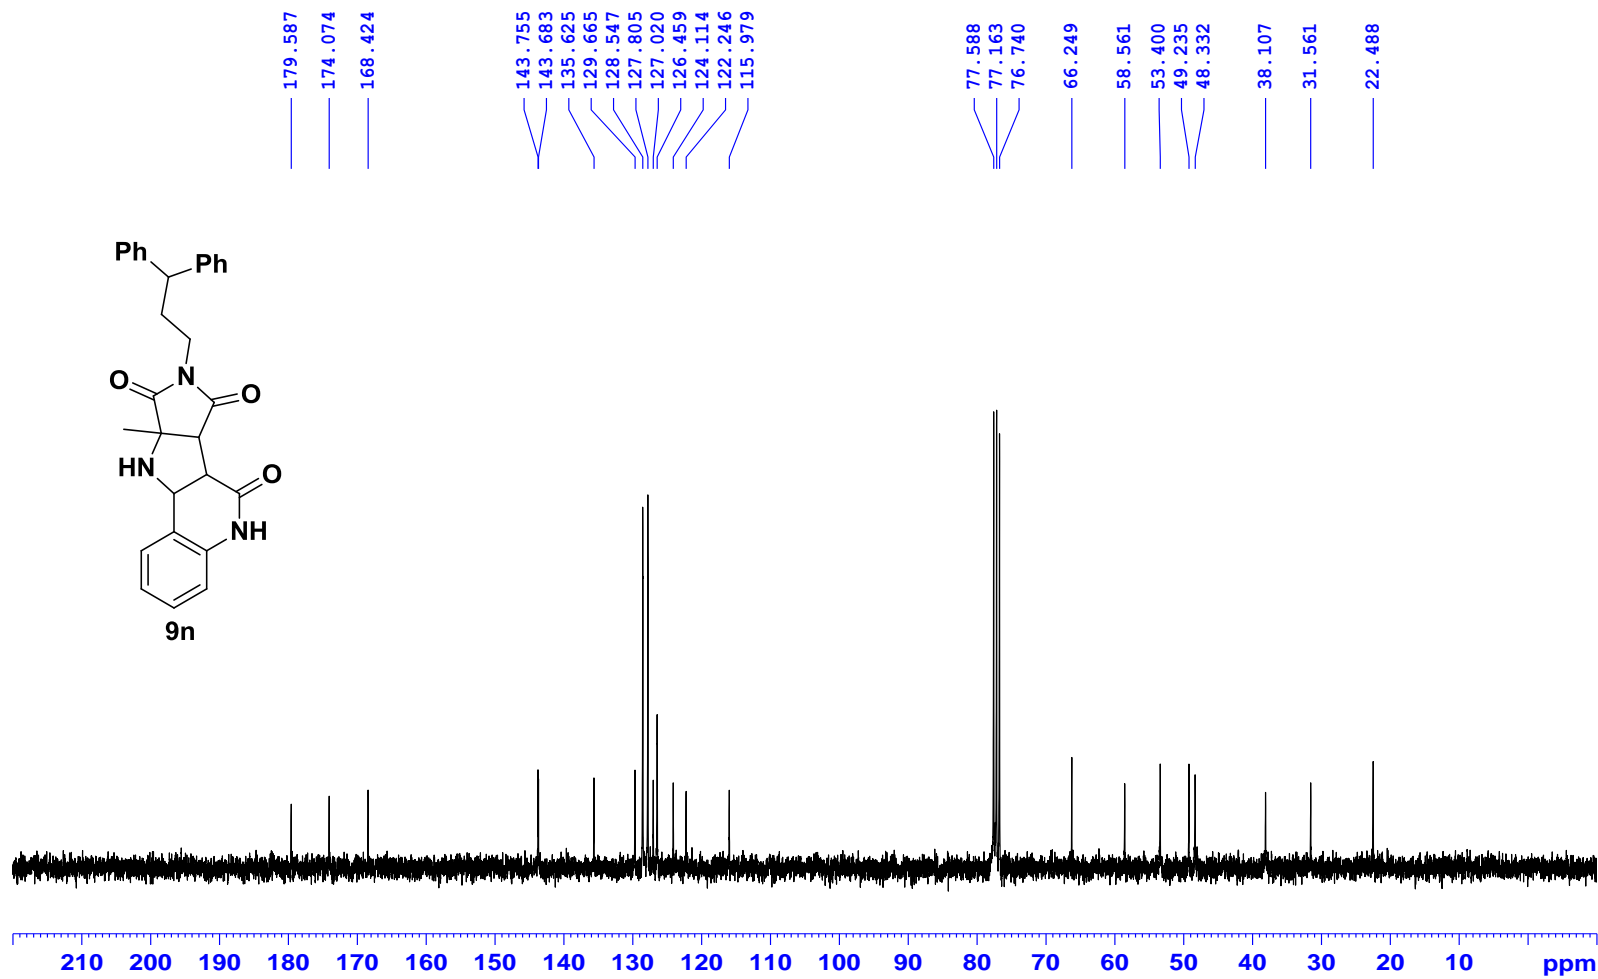

<sup>13</sup>C NMR spectrum (101 MHz) of compound **9n** in CDCl<sub>3</sub>

## [ Elemental Composition ]

Data : 1000512-011

Date : 12-May-2011 11:49

Sample: Leeut-EL14

Note : 465.54

Inlet : Direct

Ion Mode : EI+

RT : 0.89 min

Scan#: 61

Elements : C 29/0, H 36/0, N 3/0, O 3/0

Mass Tolerance : 10ppm, 3mmu if m/z &lt; 300, 20mmu if m/z &gt; 2000

Unsaturation (U.S.) : -0.5 - 200.0

| Observed m/z | Int%  | Err [ppm / mmu] | U.S. Composition       |
|--------------|-------|-----------------|------------------------|
| 465.2048     | 100.0 | -0.9 / -0.4     | 18.0 C 29 H 27 N 3 O 3 |

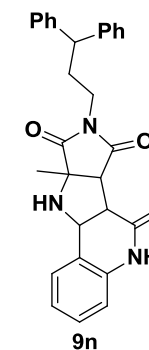HRMS (EI) of compound **9n**



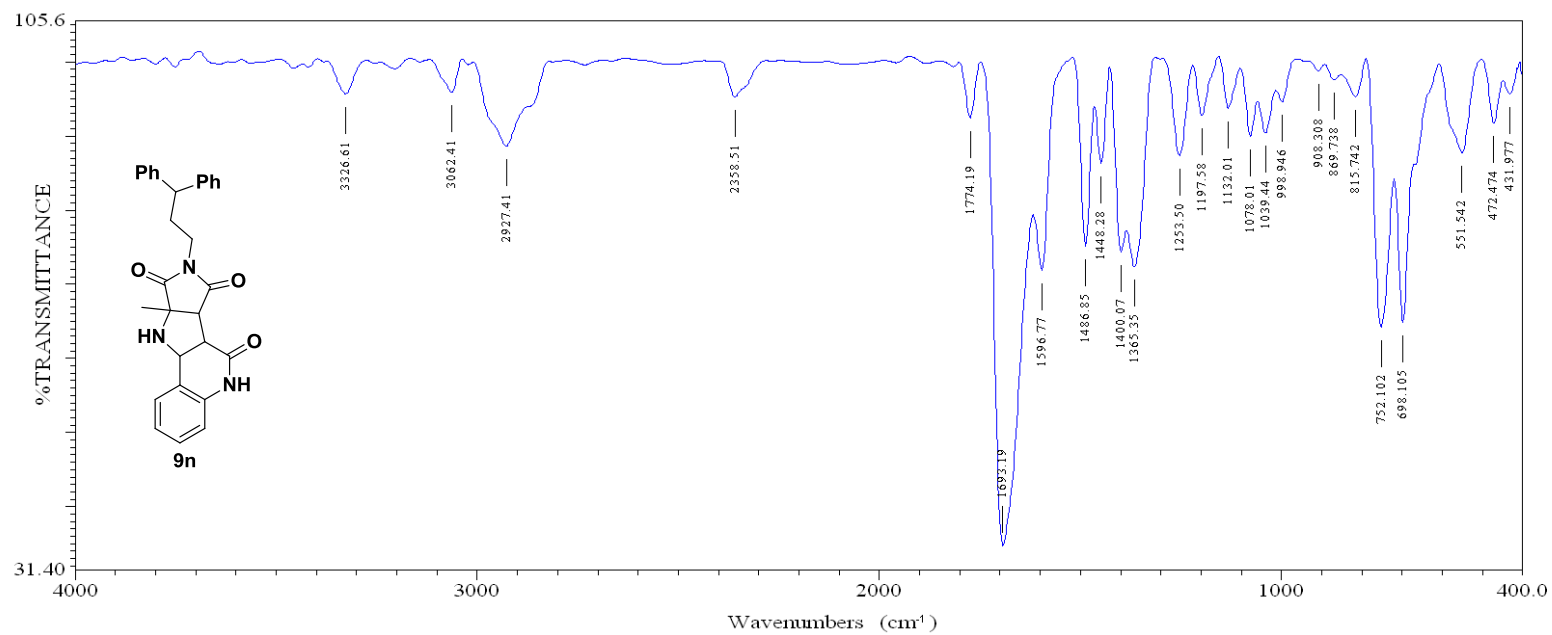

IR spectrum of compound of **9n**

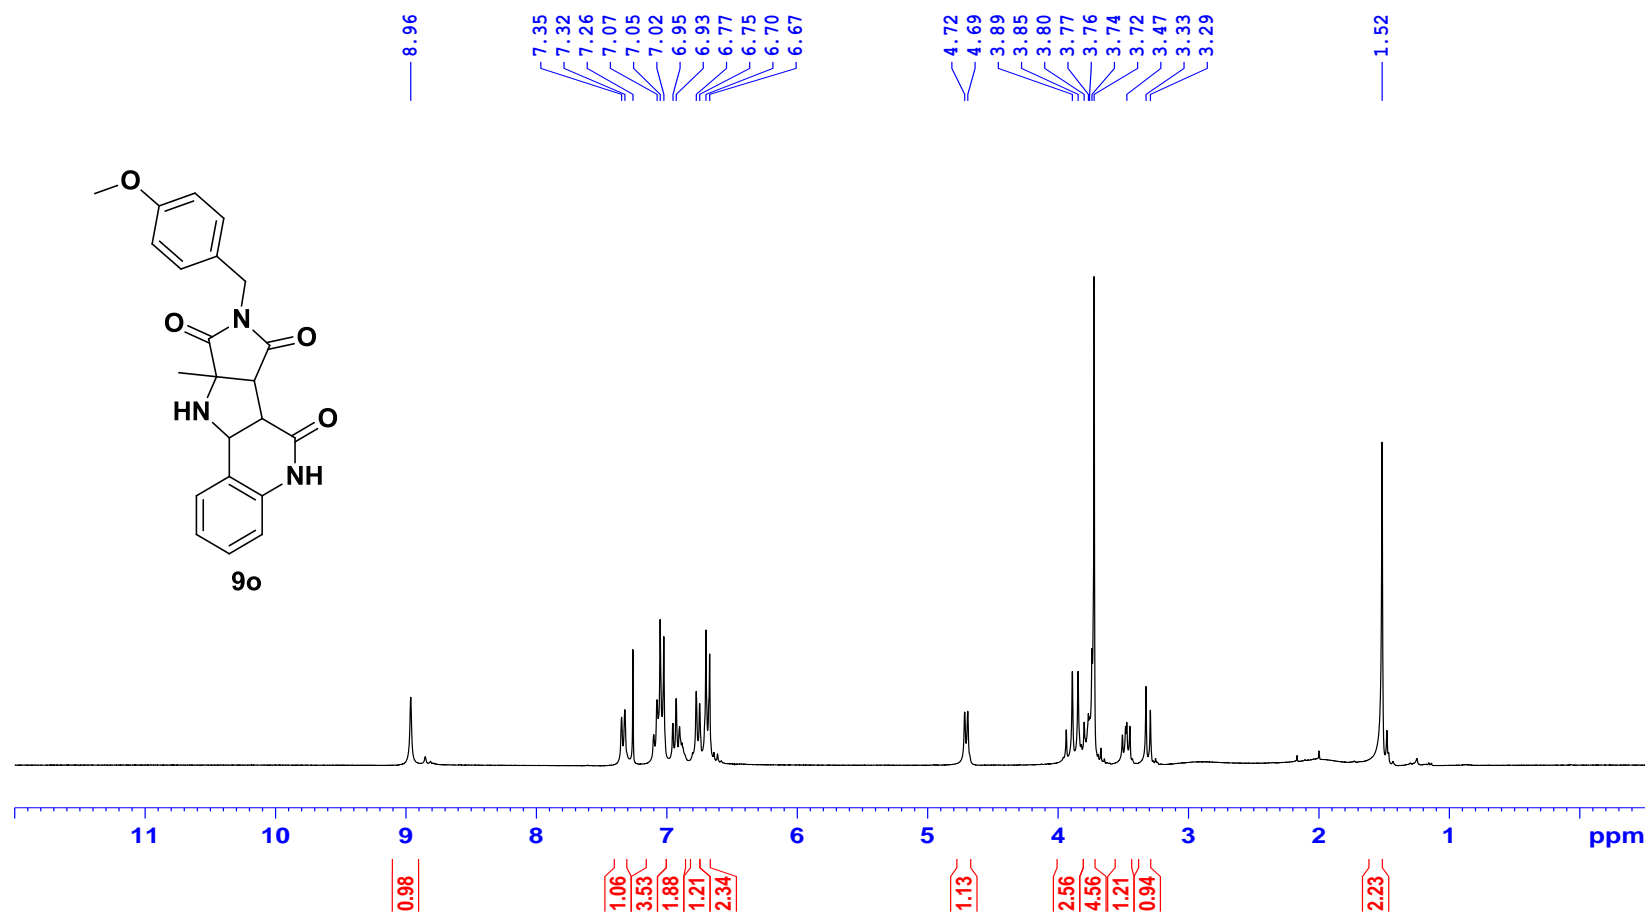

<sup>1</sup>H NMR spectrum (400 MHz) of compound **9o** in CDCl<sub>3</sub>

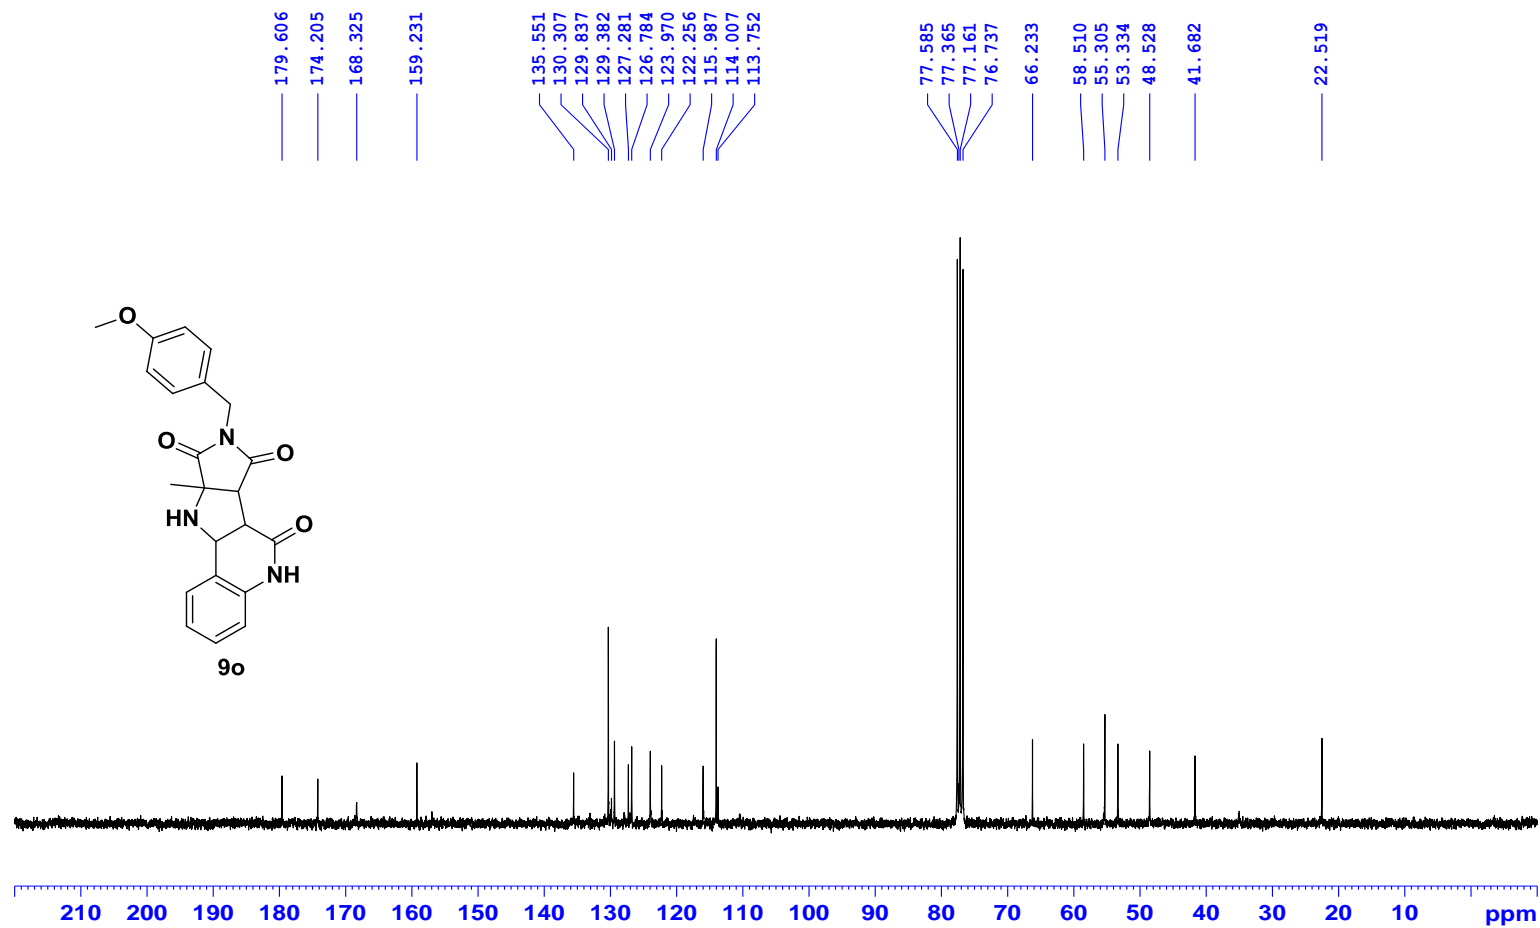

$^{13}\text{C}$  NMR spectrum (101 MHz) of compound **9o** in  $\text{CDCl}_3$

LIST: hei2532(leeut-el15)-c3 29-Sep-11 REG : 10:29.3 #9  
Samp: Start : 16:17:02 3545  
Mode: EI +VE +LMR ESCAN (EXP) UP HR NRM Inlet :  
Oper:  
Limt: ( 0)  
: (442) C23.H44.N3.O5  
Peak: 1000.00 mmu R+D: -2.0 > 60.0  
Data: +/2012>2456 (CMASS : converted; CMASS : converted | CMASS : con

| Mass     | Intensity | %RA   | Flags | Delta | R+D  | Composition   |
|----------|-----------|-------|-------|-------|------|---------------|
| 391.1541 | 22334     | 49.96 | #     | -0.9  | 14.0 | C22.H21.N3.O4 |

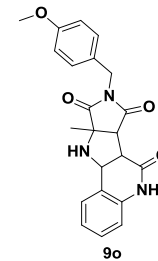

HRMS (EI) of compound 9o

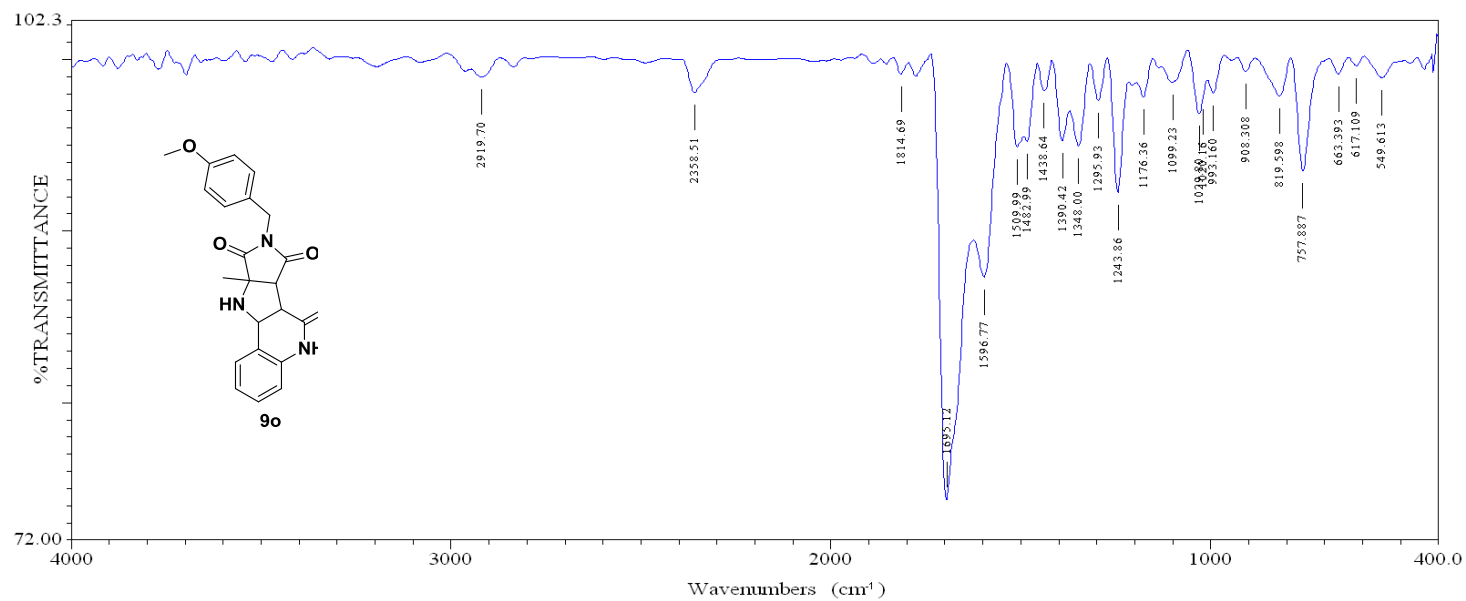

IR spectrum of compound of **9o**

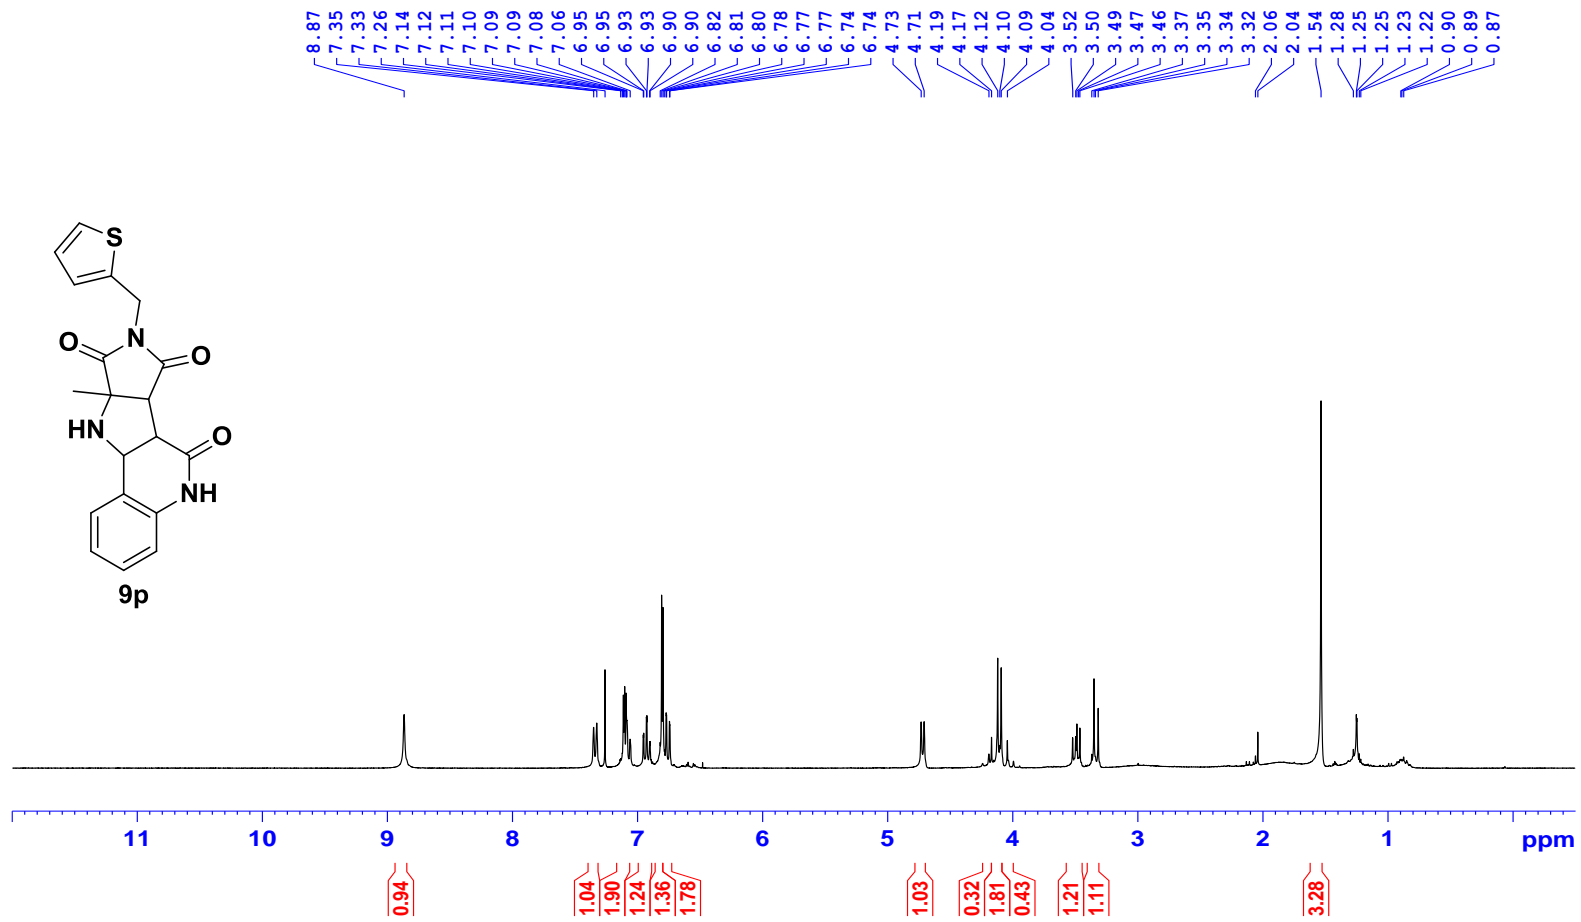

$^1\text{H}$  NMR spectrum (400 MHz) of compound **9p** in  $\text{CDCl}_3$

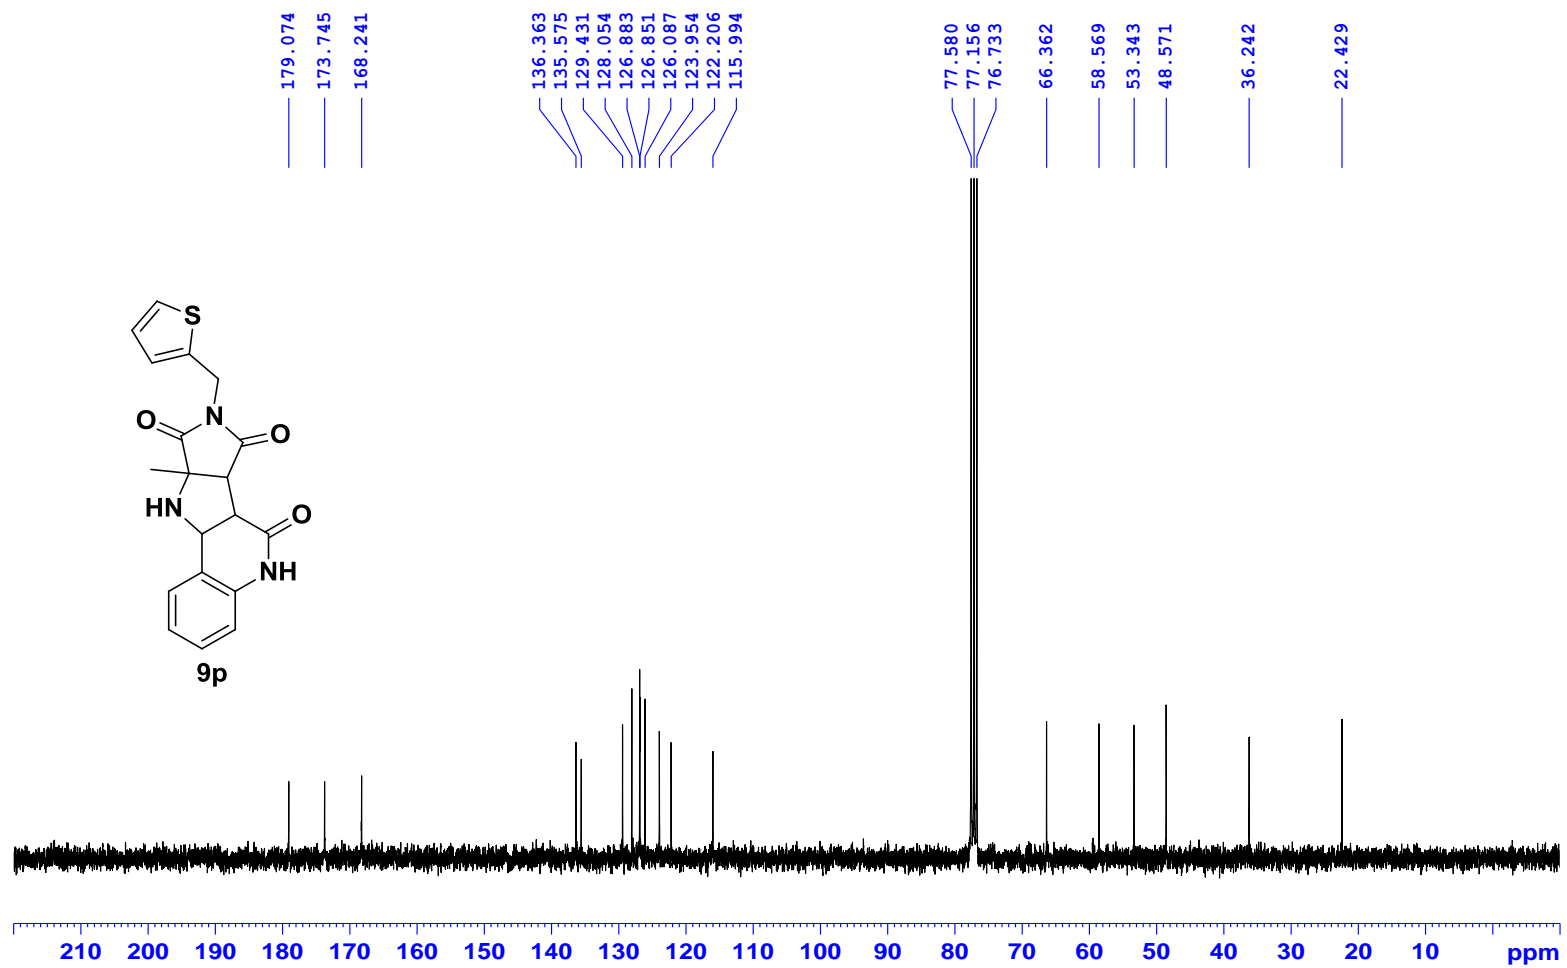

$^{13}\text{C}$  NMR spectrum (101 MHz) of compound **9p** in  $\text{CDCl}_3$

LIST: hei2530(leeutel16)-c2 29-Sep-11 REG : 02:40.3 #9  
Samp: Start : 15:40:54 2365  
Mode: EI +VE +LMR ESCAN (EXP) UP HR NRM Inlet :  
Oper:  
Limt: ( 0)  
: (394) C19.H44.S.N3.O3  
Peak: 1000.00 mmu R+D: -2.0 > 60.0  
Data: +/463>901 (CMASS : converted | CMASS : converted | CMASS : conve

| Mass     | Intensity | %RA   | Flags | Delta (mmu) | R+D  | Composition     |
|----------|-----------|-------|-------|-------------|------|-----------------|
| 367.0998 | 5086      | 72.54 | #?    | -0.7        | 13.0 | C19.H17.S.N3.O3 |

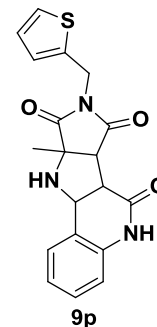

HRMS (EI) of compound 9p



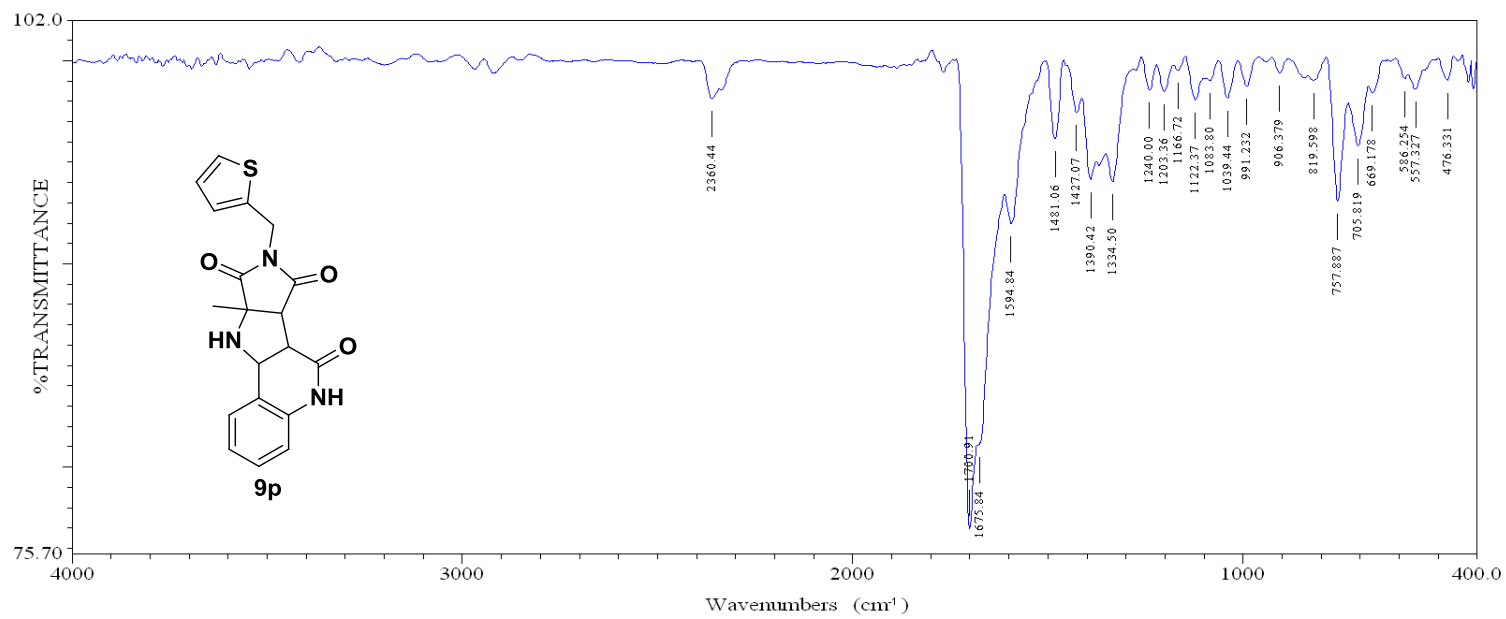

IR spectrum of **9p**

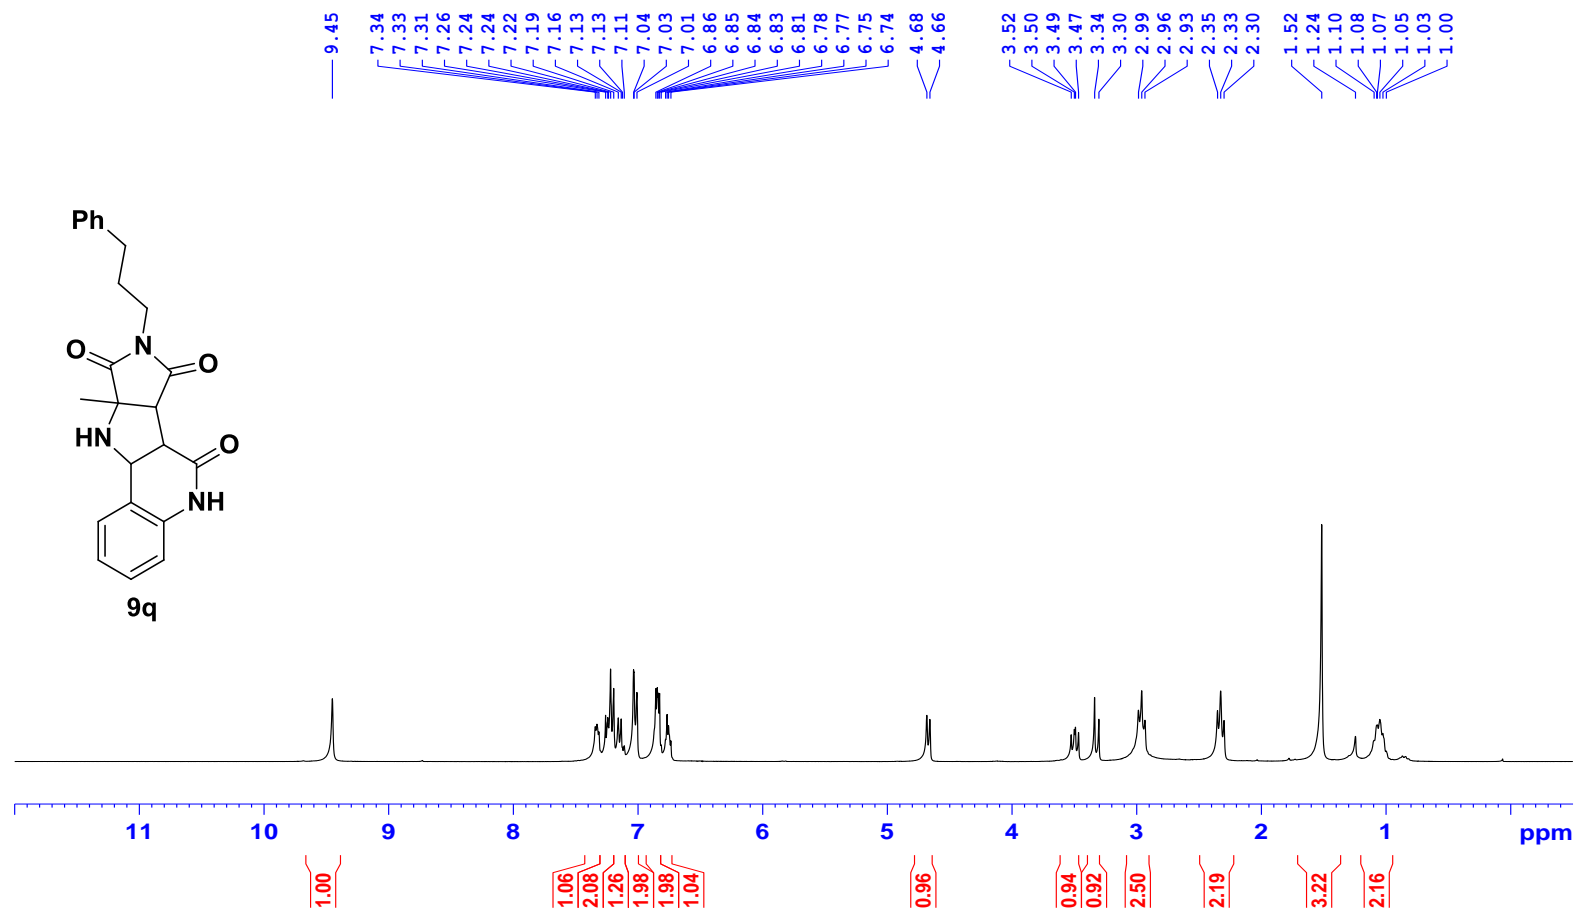

$^1\text{H}$  NMR spectrum (400 MHz) of compound **9q** in  $\text{CDCl}_3$

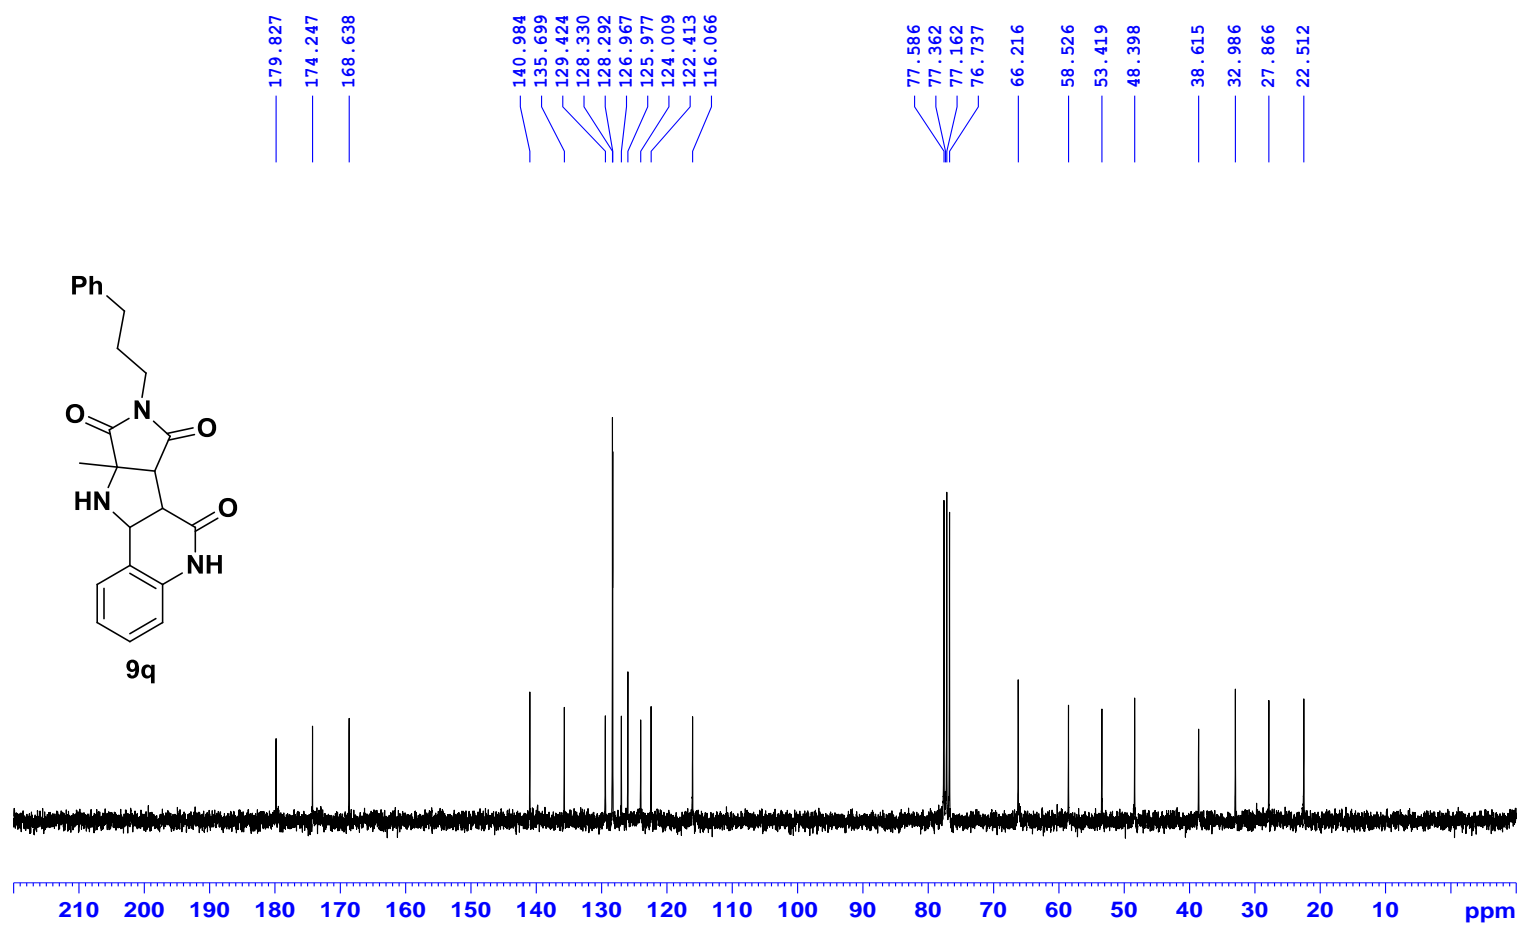

<sup>13</sup>C NMR spectrum (101 MHz) of compound **9q** in CDCl<sub>3</sub>

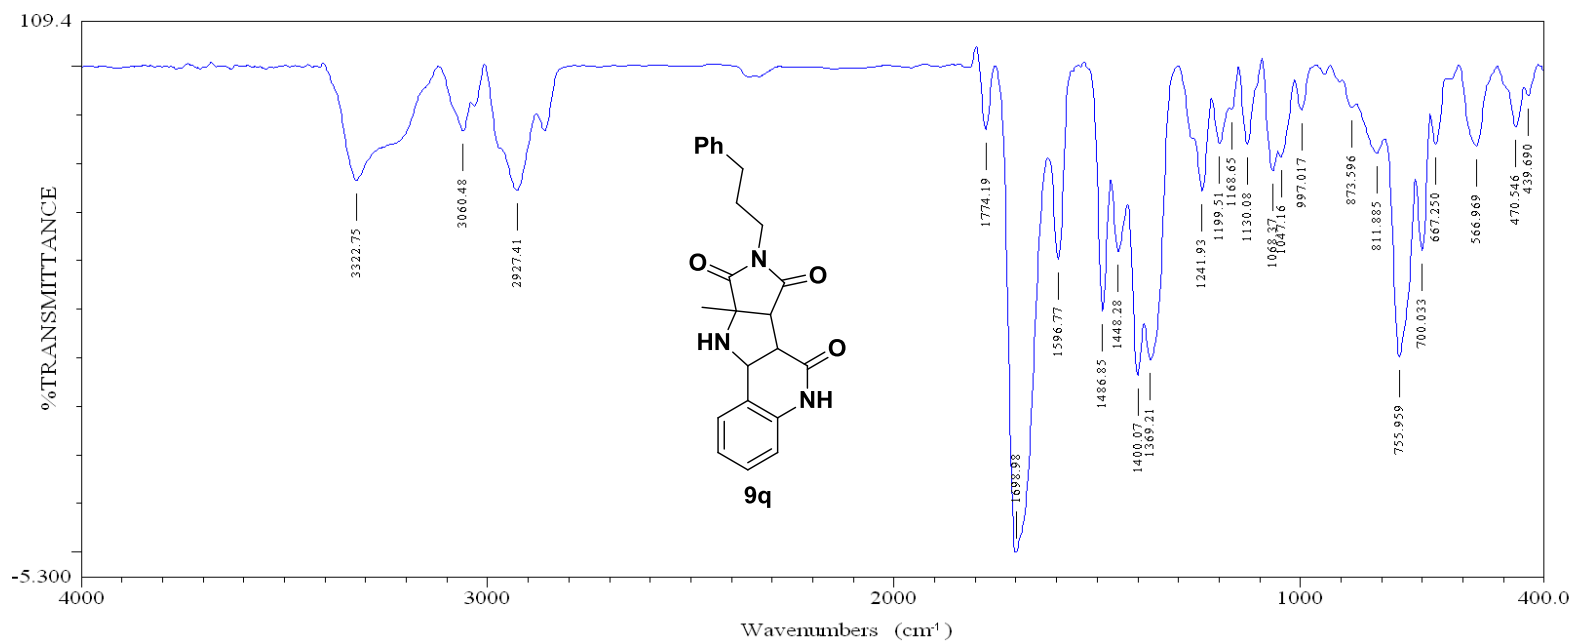

IR spectrum of **9q**

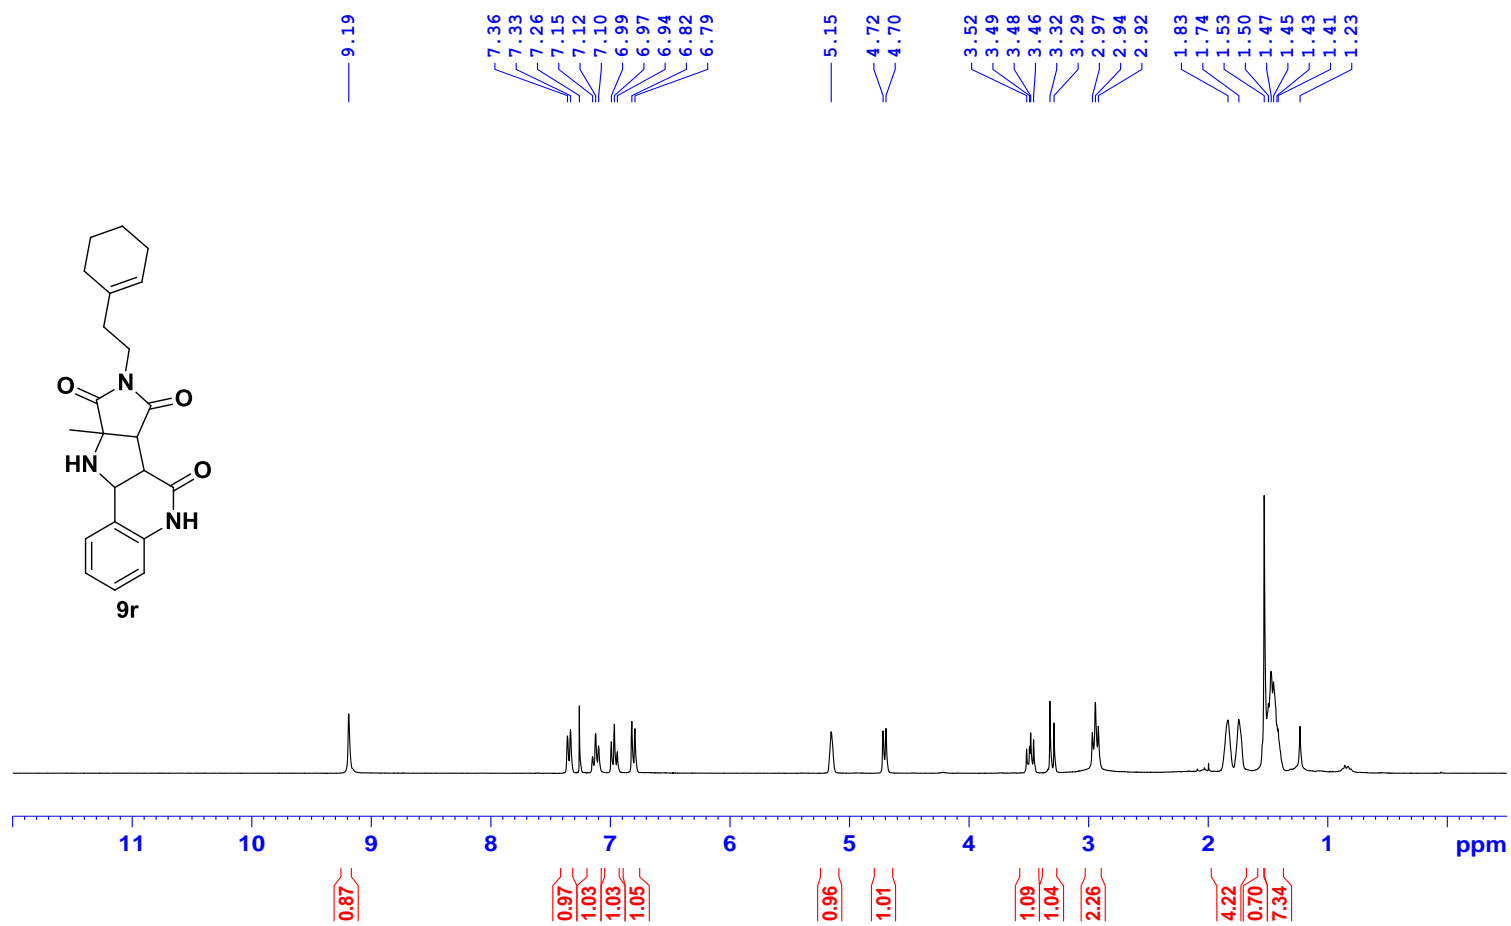

$^1\text{H}$  NMR spectrum (400 MHz) of compound **9r** in  $\text{CDCl}_3$

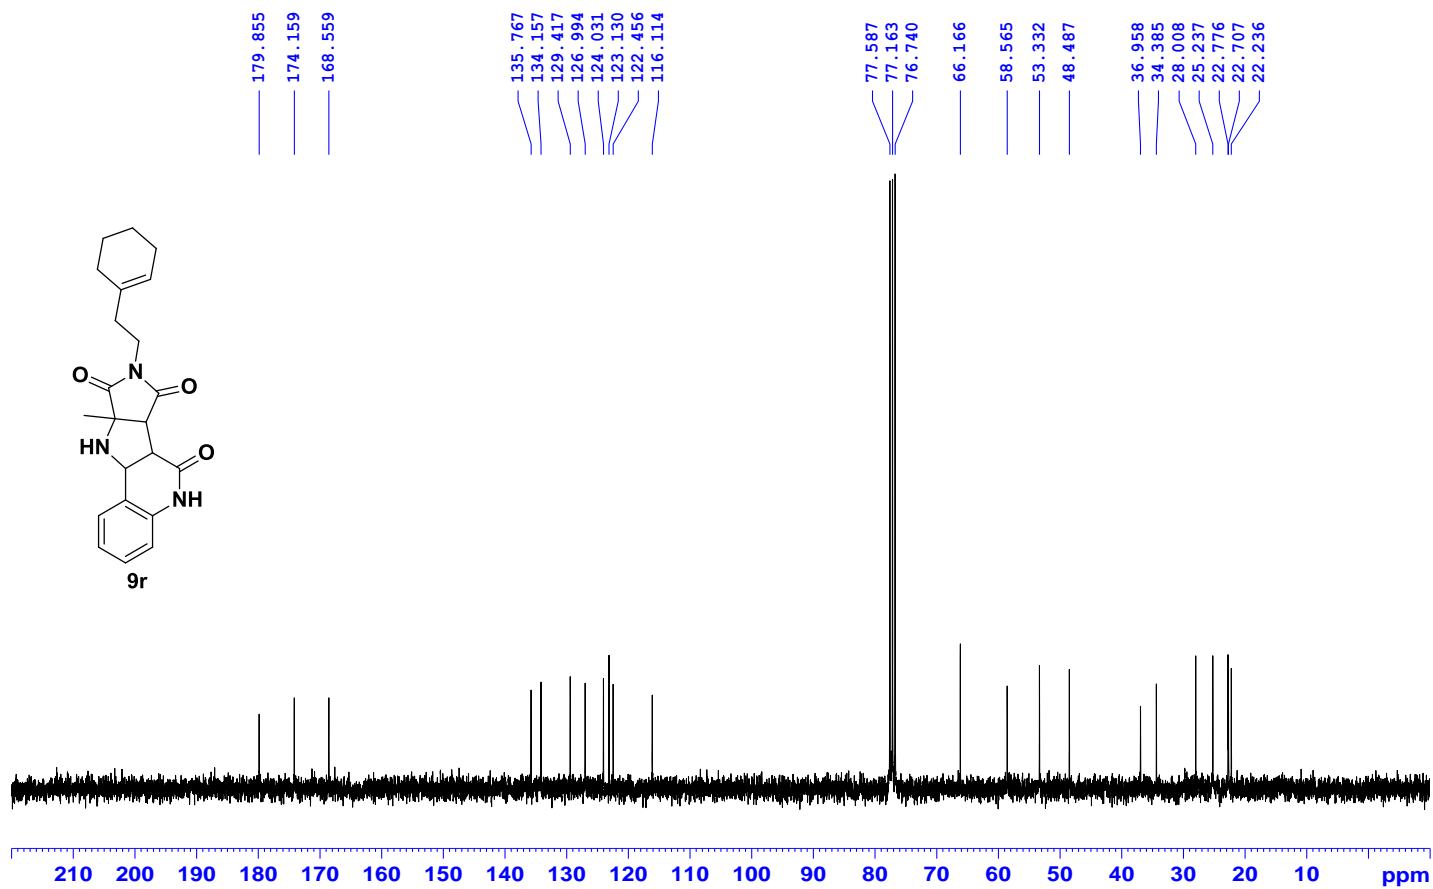

<sup>13</sup>C NMR spectrum (101 MHz) of compound **9r** in CDCl<sub>3</sub>

[ Elemental Composition ]

Data : 201111053  
Sample: leeut-E118  
Note : -

Date : 22-Oct-2011 17:49

Inlet : Direct  
RT : 0.78 min

Ion Mode : EI+  
Scan#: 32

Elements : C 23/0, H 27/0, O 5/0, N 3/0

Mass Tolerance : 1000ppm, 3mmu if m/z < 3, 5mmu if m/z > 5

Unsaturation (U.S.) : -0.1 - 36.0

| Observed m/z | Int% | Err [ppm / mmu] | U.S. | Composition       |
|--------------|------|-----------------|------|-------------------|
| 379.1899     | 60.7 | +0.8 / +0.3     | 12.0 | C 22 H 25 O 3 N 3 |

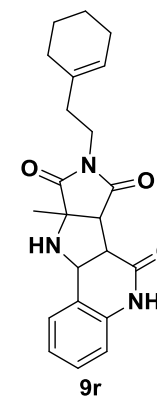

HRMS (EI) of compound **9r**

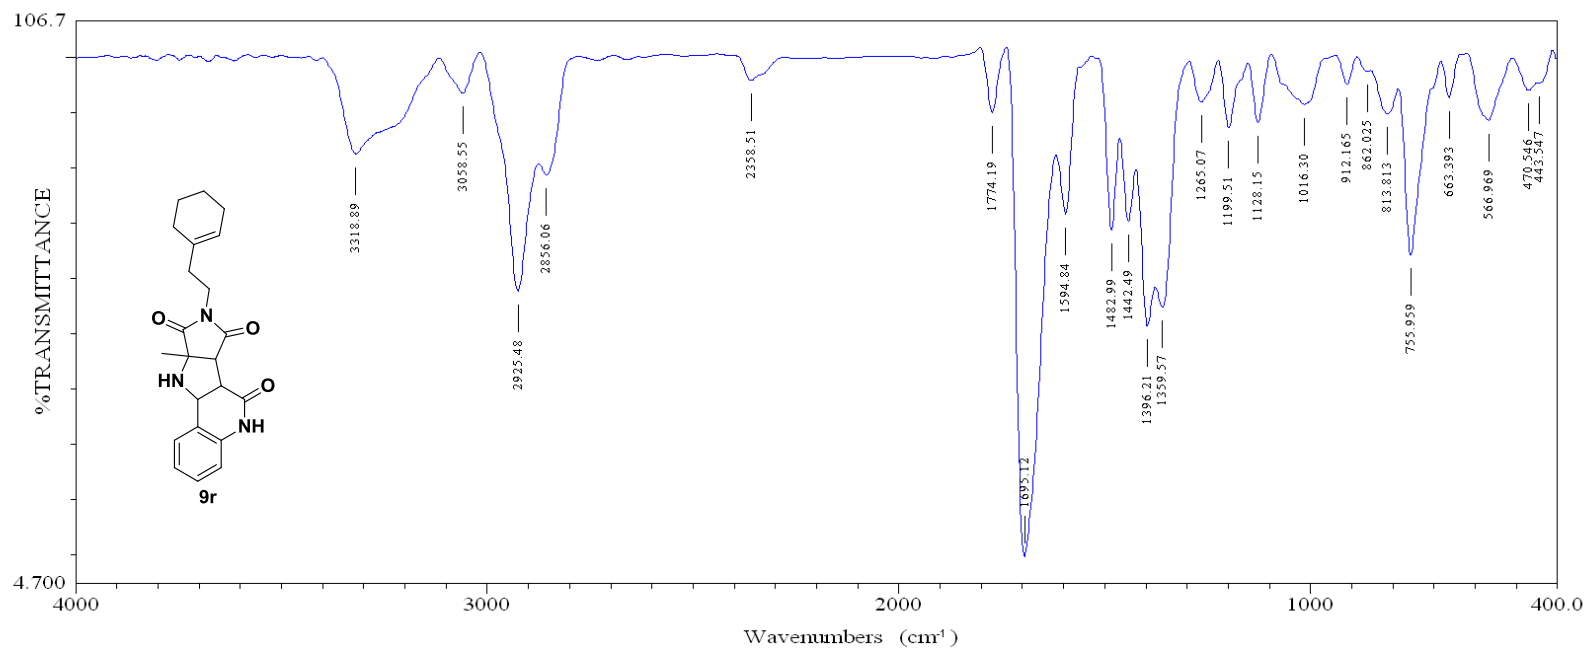

IR spectrum of **9r**



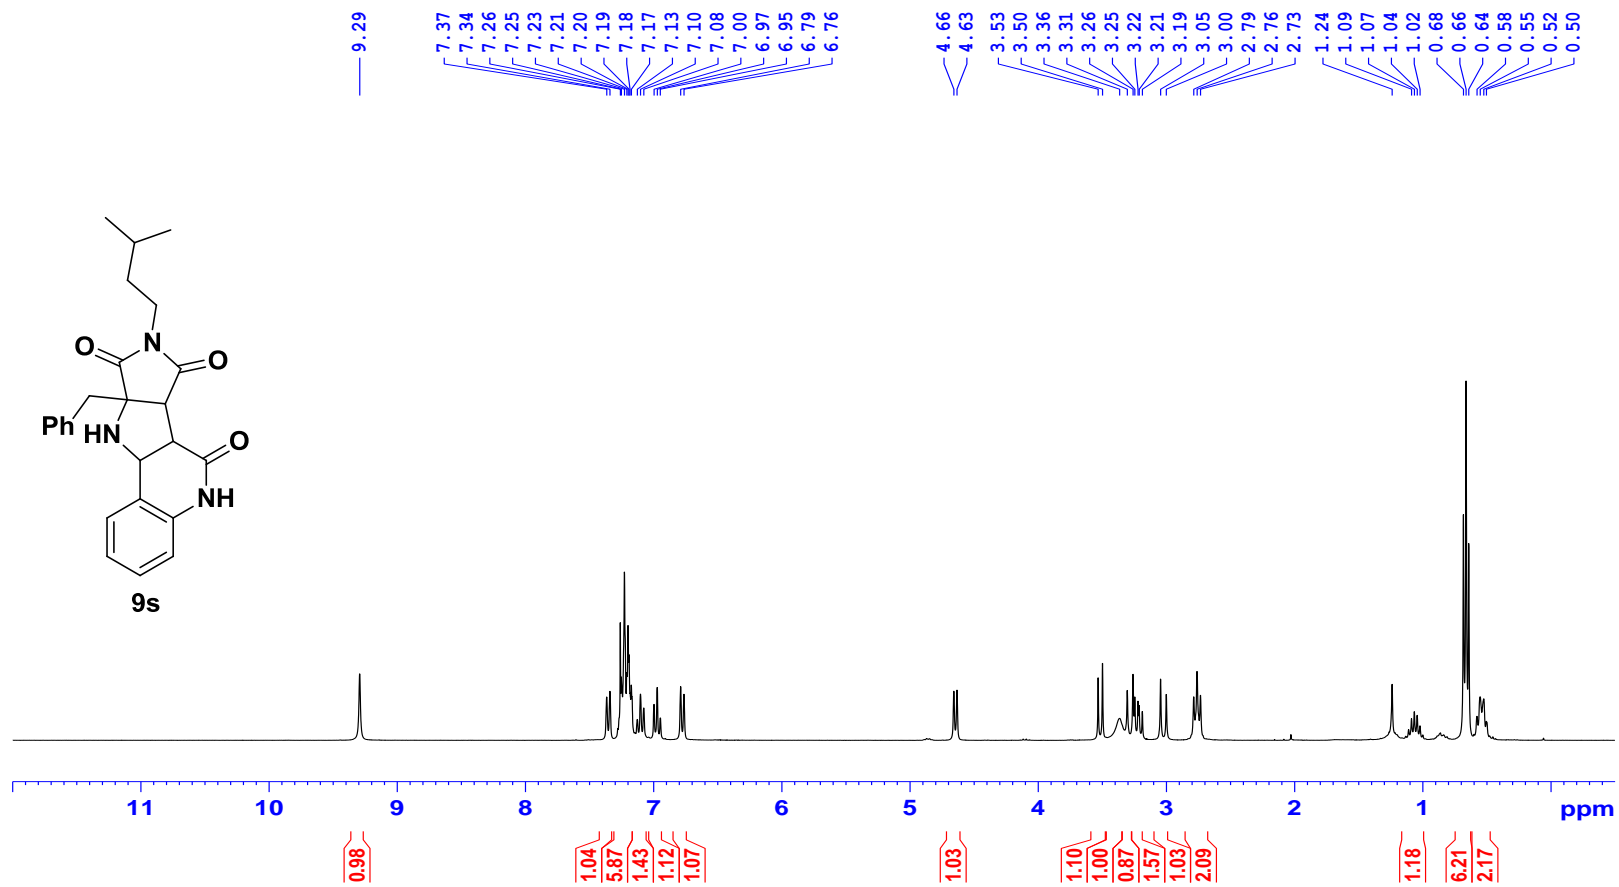

$^1\text{H}$  NMR spectrum (400 MHz) of compound **9s** in  $\text{CDCl}_3$

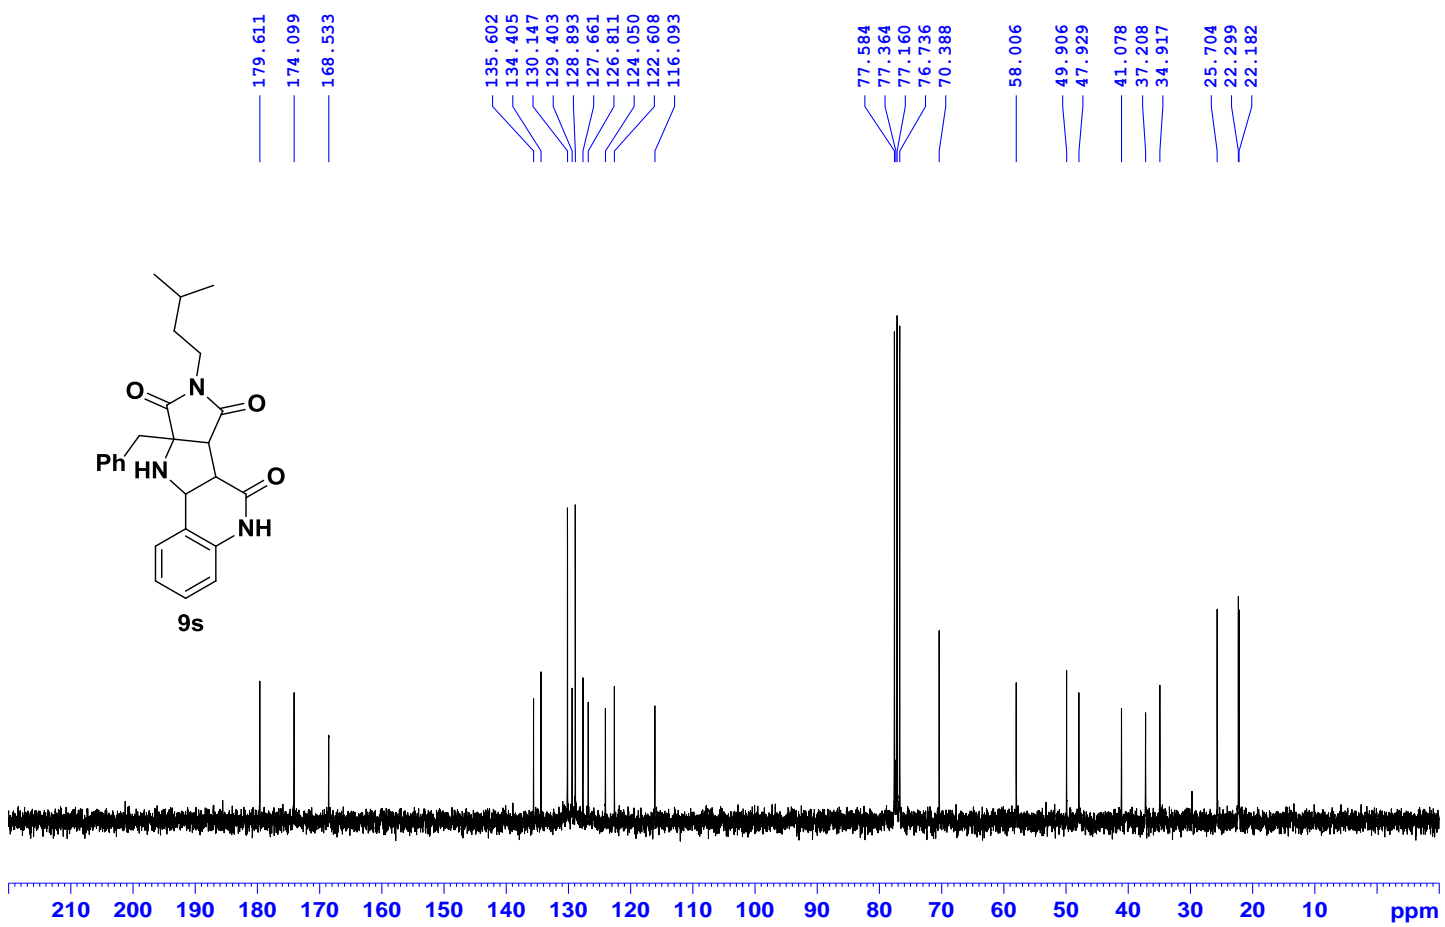

<sup>13</sup>C NMR spectrum (101 MHz) of compound **9s** in CDCl<sub>3</sub>

[ Elemental Composition ]

Data : 201111054

Sample: leeut-E119

Note : -

Inlet : Direct

RT : 0.70 min

Elements : C 25/0, H 27/0, O 5/0, N 3/0

Mass Tolerance : 1000ppm, 3mmu if m/z < 3, 5mmu if m/z > 5

Unsaturation (U.S.) : -0.1 - 36.0

Date : 22-Oct-2011 17:54

Ion Mode : EI+

Scan#: 32

| Observed m/z | Int% | Err [ppm / mmu] | U.S. | Composition       |
|--------------|------|-----------------|------|-------------------|
| 417.2050     | 36.6 | -0.5 / -0.2     | 14.0 | C 25 H 27 O 3 N 3 |

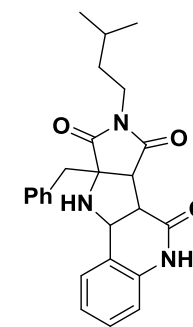

9s

HRMS (EI) of compound 9s

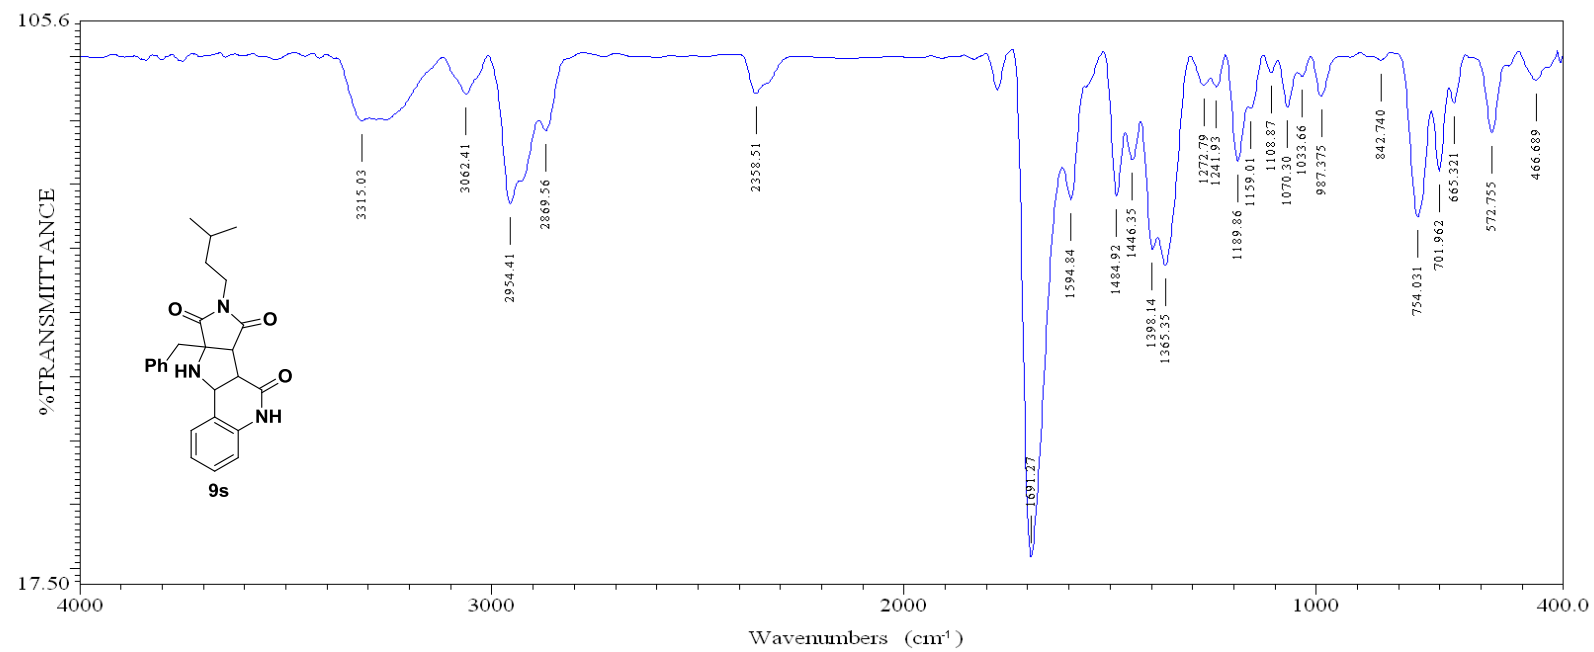

IR spectrum of compound **9s**

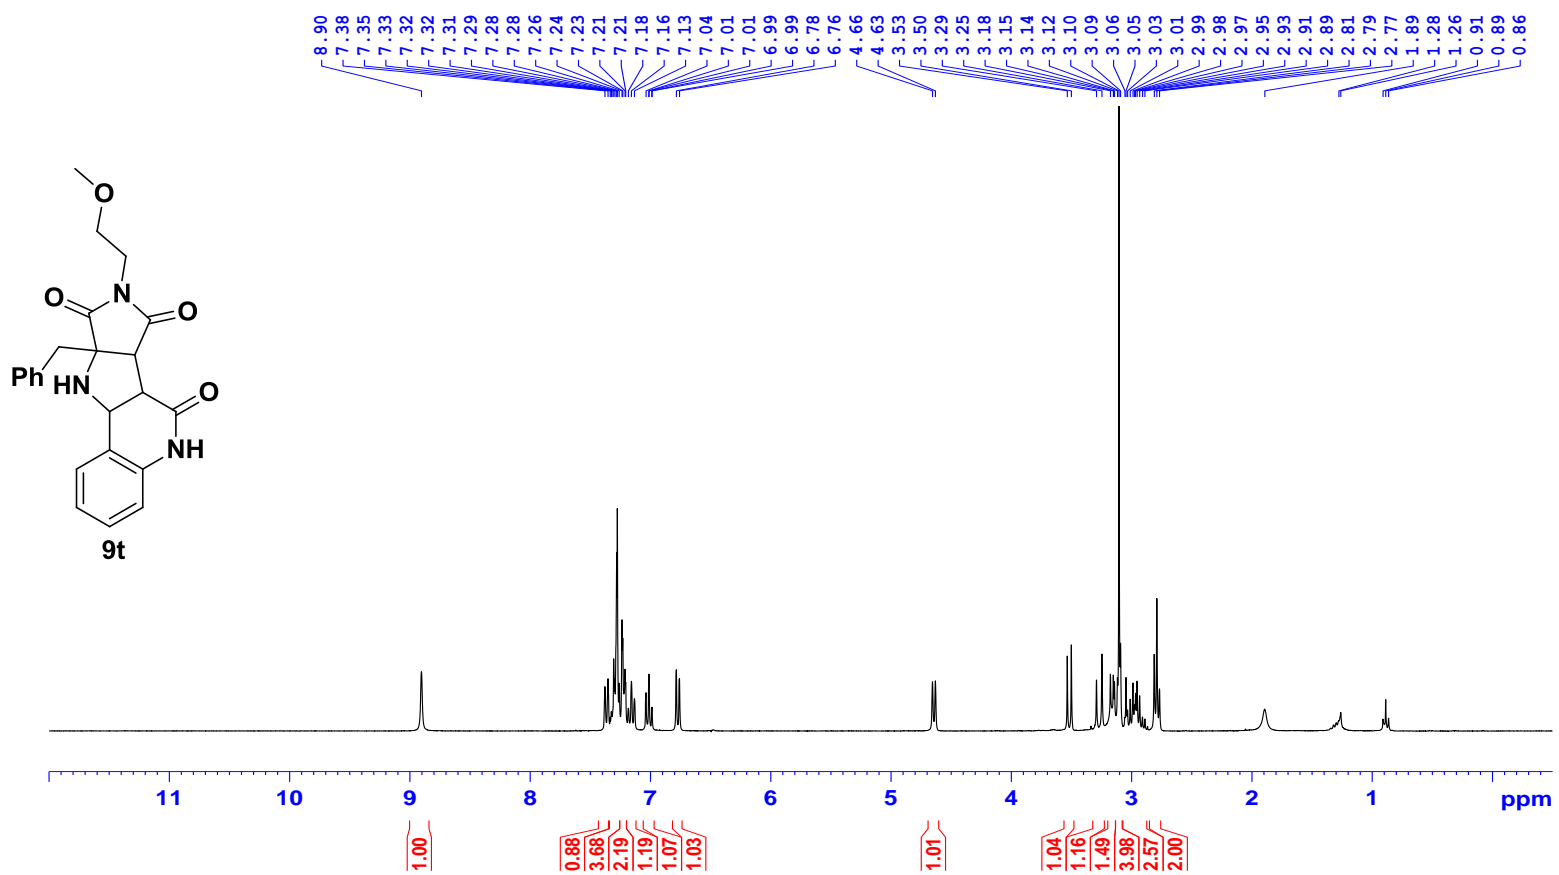

<sup>1</sup>H NMR spectrum (400 MHz) of compound **9t** in CDCl<sub>3</sub>

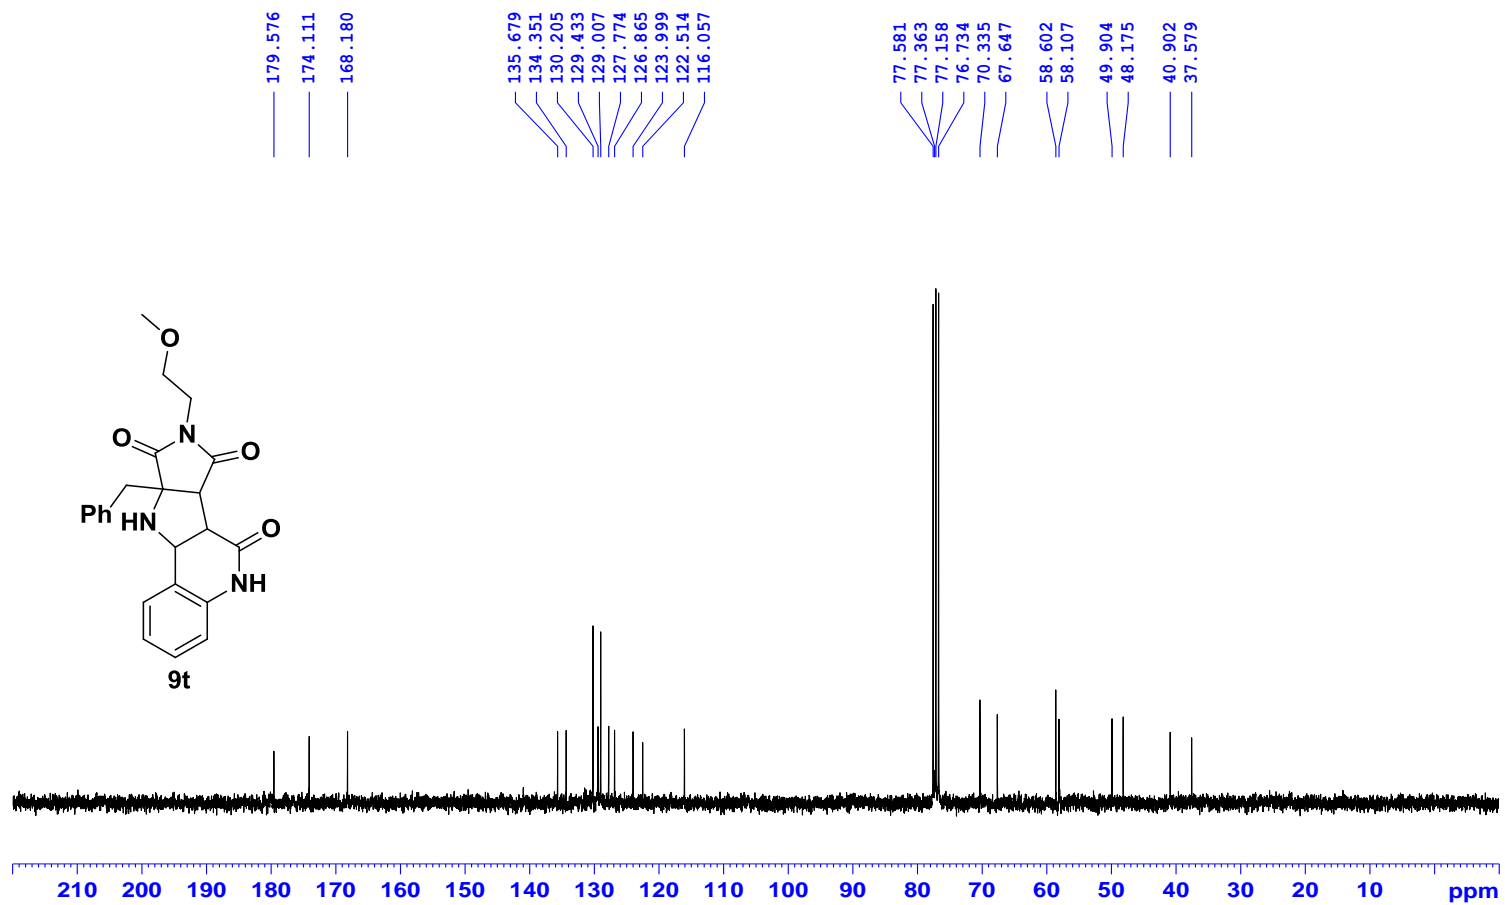

<sup>13</sup>C NMR spectrum (101 MHz) of compound **9t** in CDCl<sub>3</sub>

[ Elemental Composition ]

Data : 201111055  
Sample: leeut-El20  
Note : -

Date : 22-Oct-2011 17:58

Inlet : Direct  
RT : 0.85 min

Ion Mode : EI+  
Scan#: 42

Elements : C 23/0, H 27/0, O 5/0, N 3/0

Mass Tolerance : 1000ppm, 3mmu if m/z < 3, 5mmu if m/z > 5

Unsaturation (U.S.) : -0.1 - 36.0

| Observed m/z | Int%  | Err [ppm / mmu] | U.S. | Composition       |
|--------------|-------|-----------------|------|-------------------|
| 405.1685     | 100.0 | -0.9 / -0.4     | 14.0 | C 23 H 23 O 4 N 3 |

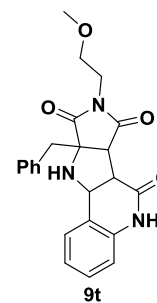

HRMS (EI) of compound 9t

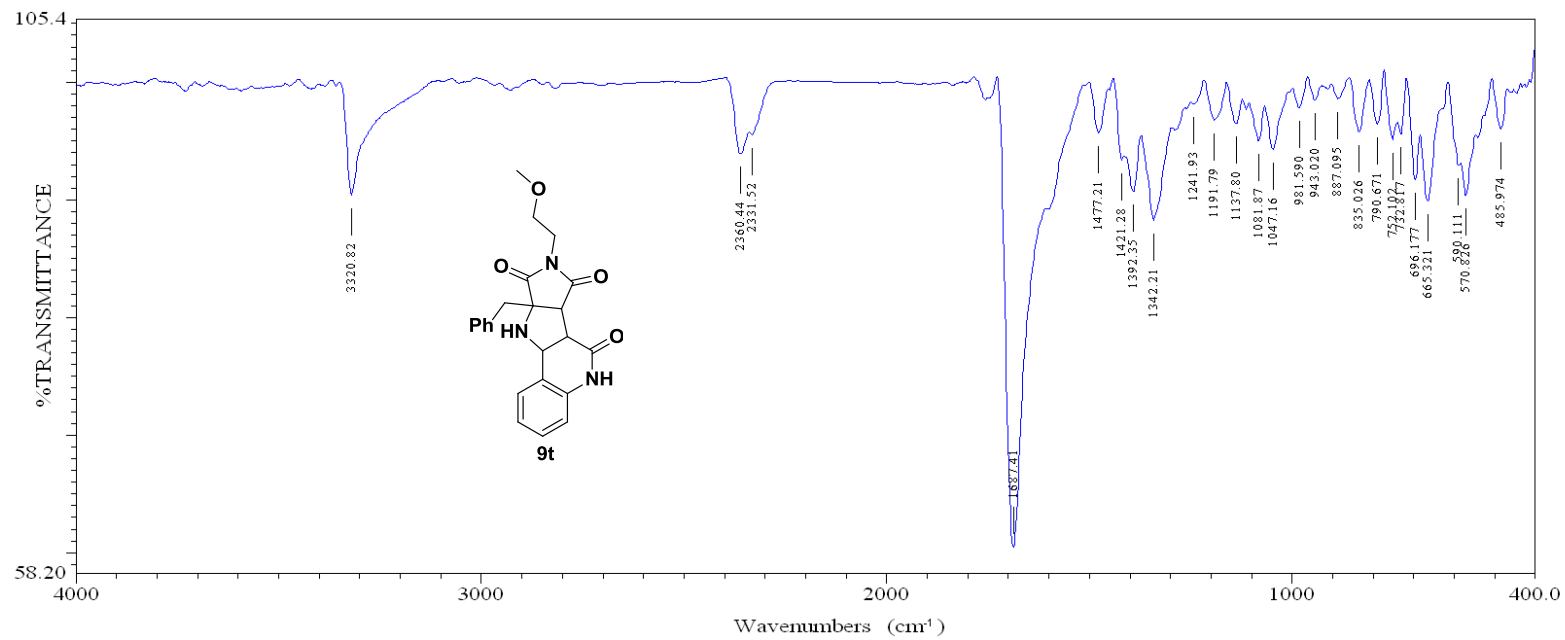

IR spectrum of compound **9t**



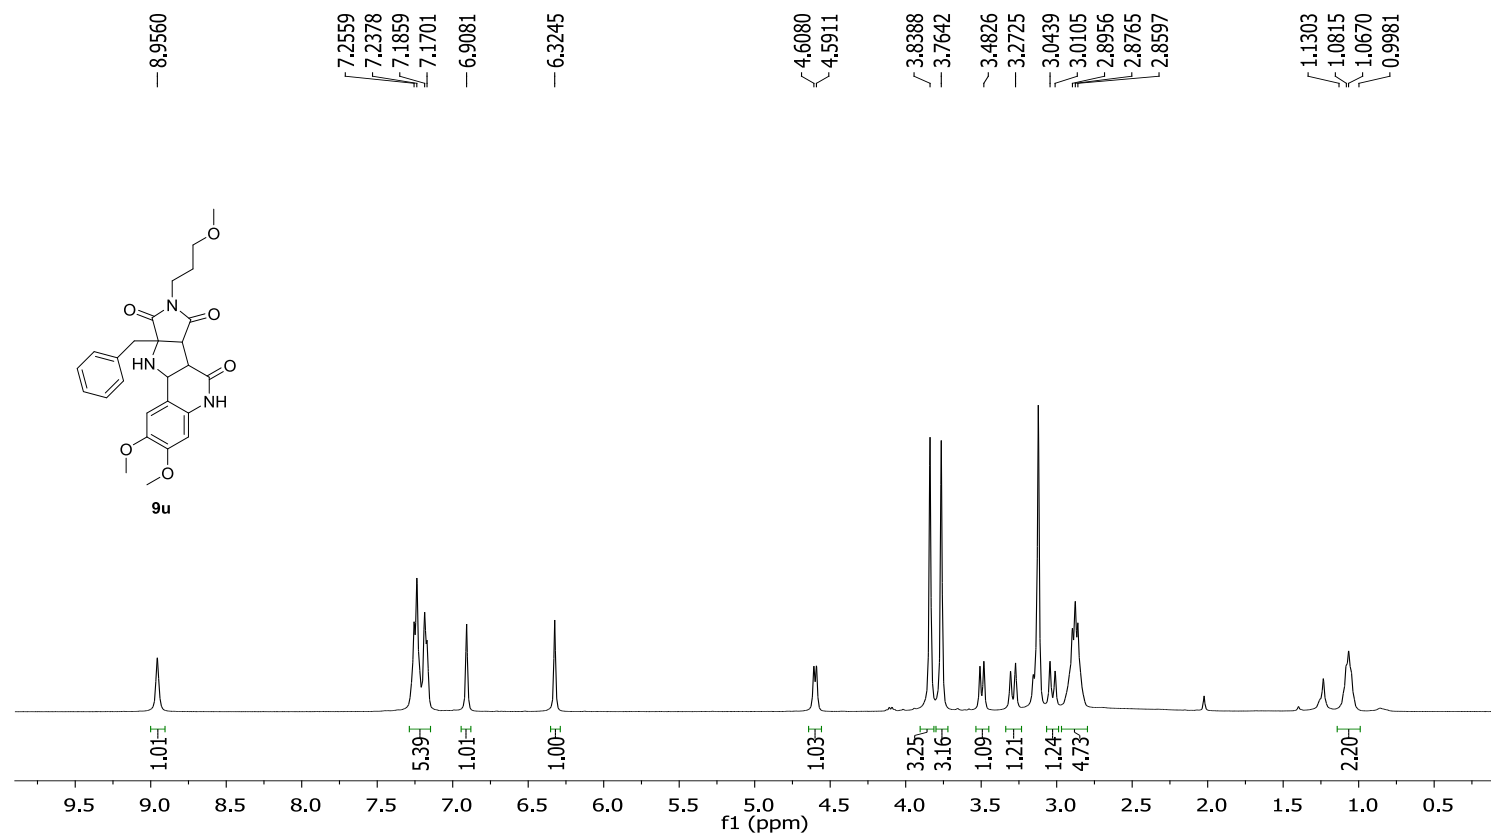

<sup>1</sup>H NMR of compound **9u** in CDCl<sub>3</sub>

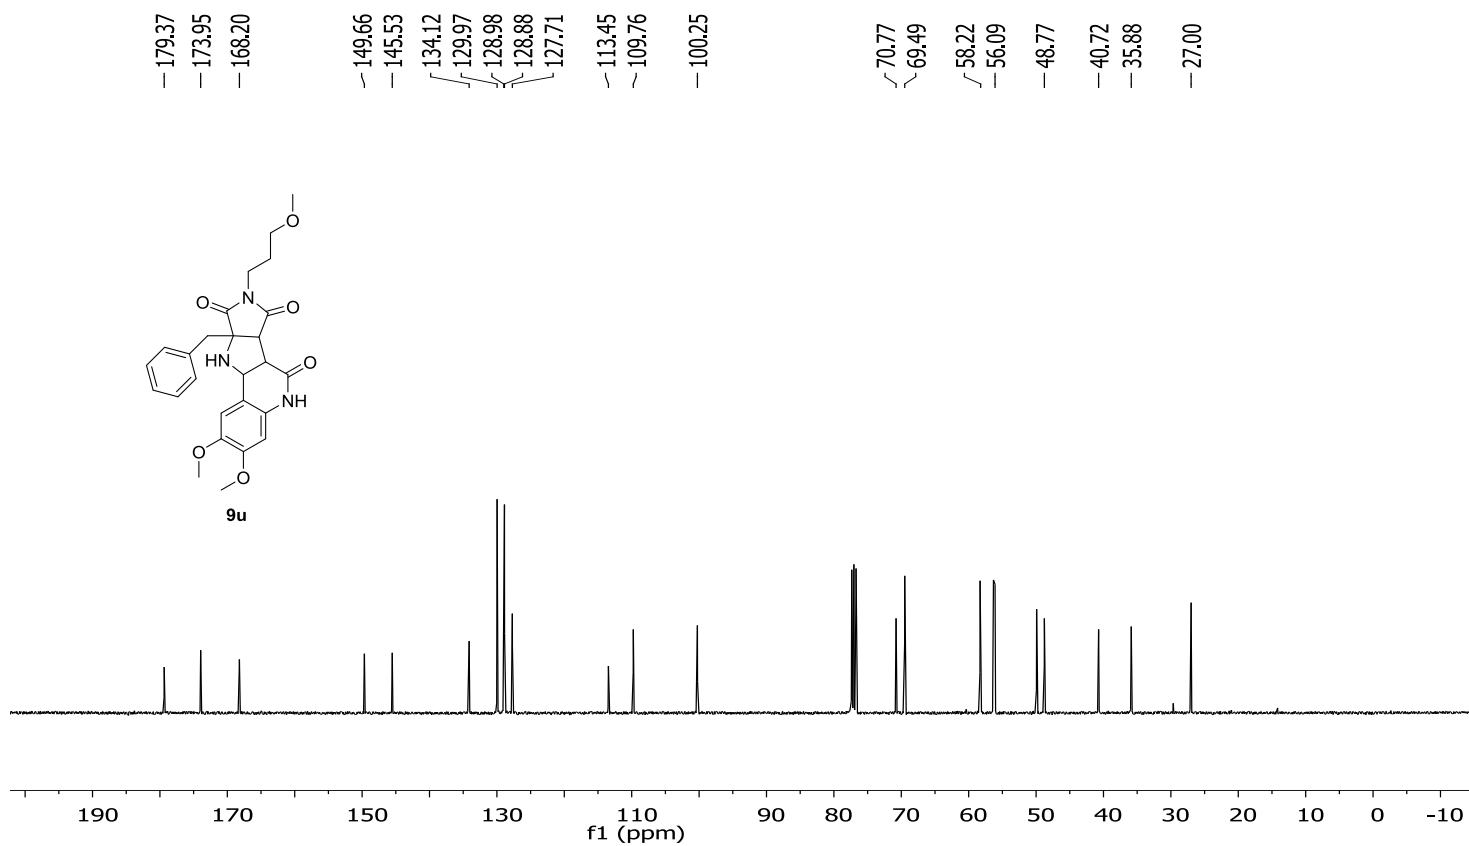

$^{13}\text{C}$  NMR of compound **9u** in  $\text{CDCl}_3$

---

## Display Report

---

| Meas. m/z | # | Ion Formula                                                   | m/z      | err [ppm] | mSigma | # Sigma | Score  | rdb  | e <sup>-</sup> Conf | N-Rule | Adduct |
|-----------|---|---------------------------------------------------------------|----------|-----------|--------|---------|--------|------|---------------------|--------|--------|
| 480.2138  | 1 | C <sub>26</sub> H <sub>30</sub> N <sub>3</sub> O <sub>6</sub> | 480.2129 | -1.9      | 11.1   | 1       | 100.00 | 13.5 | even                | ok     | M+H    |

HRMS (ESI) of compound of **9u**

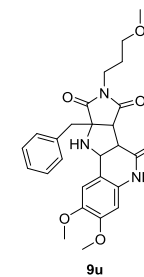

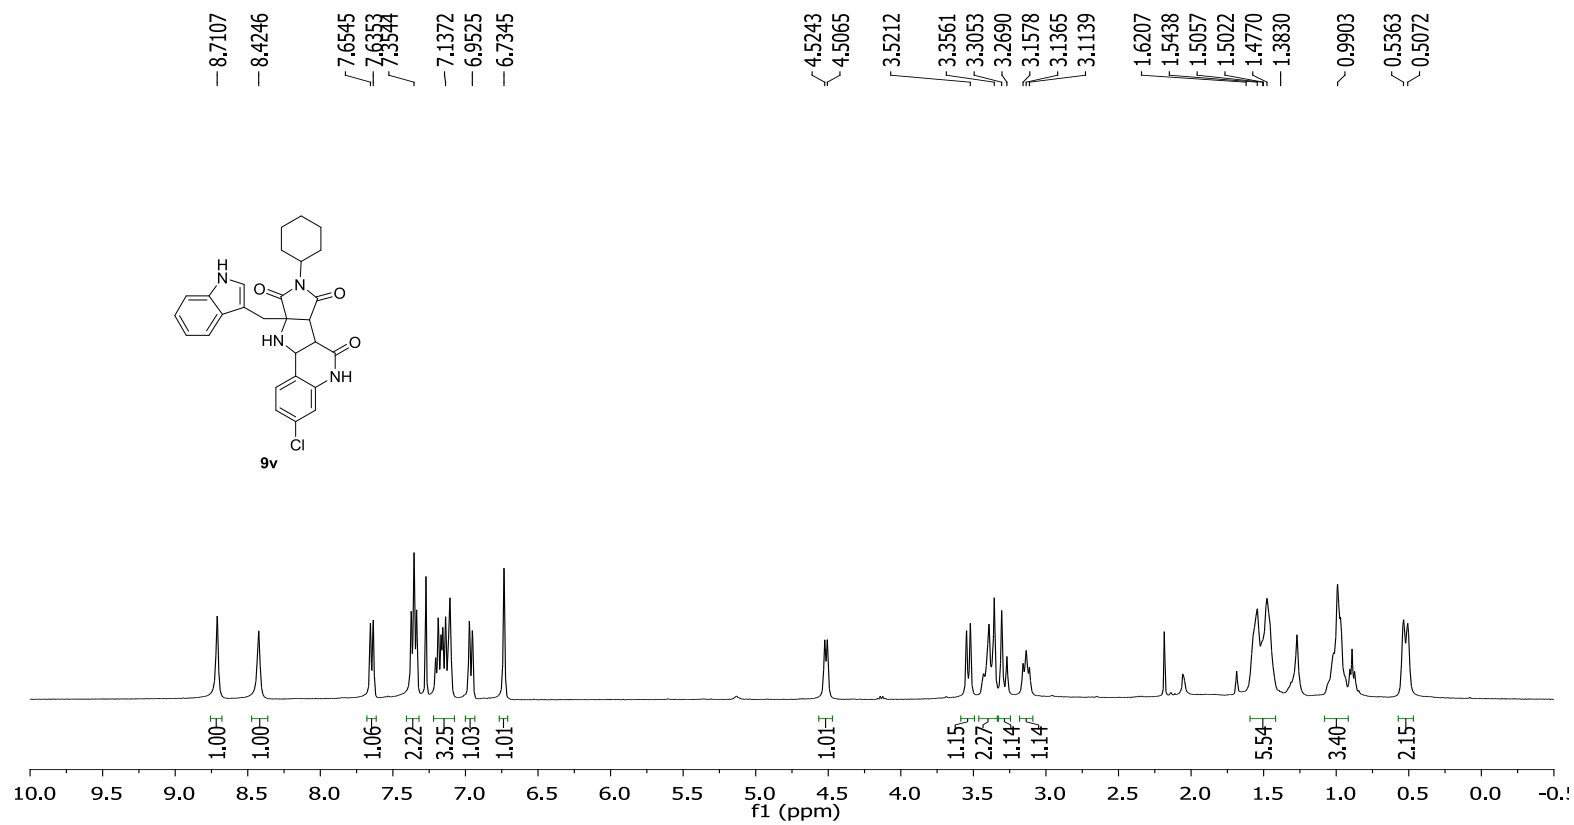

<sup>1</sup>H NMR of compound **9v** in CDCl<sub>3</sub>

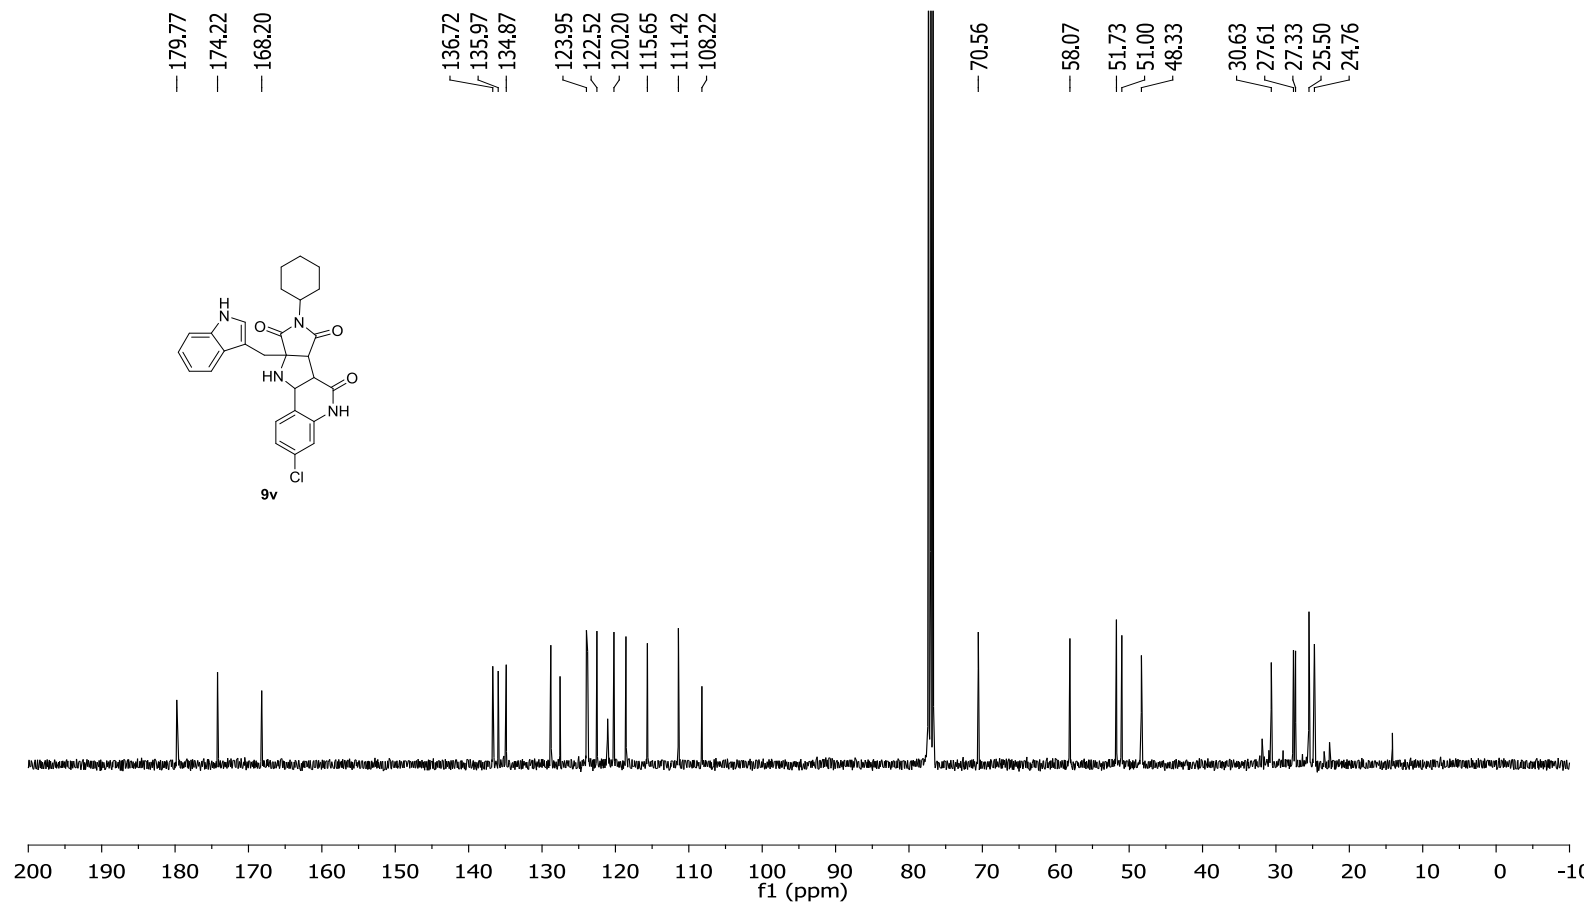

<sup>13</sup>C NMR of compound **9v** in CDCl<sub>3</sub>

---

## Display Report

---

| Meas. m/z | # | Ion Formula                                                     | m/z      | err [ppm] | mSigma | # Sigma | Score  | rdb  | e <sup>-</sup> Conf | N-Rule | Adduct | Adduct |
|-----------|---|-----------------------------------------------------------------|----------|-----------|--------|---------|--------|------|---------------------|--------|--------|--------|
| 503.1850  | 1 | C <sub>28</sub> H <sub>28</sub> ClN <sub>4</sub> O <sub>3</sub> | 503.1844 | 1.1       | 7.9    | 1       | 100.00 | 16.5 | even                | ok     | M+H    | M+H    |

HRMS (ESI) of compound **9v**

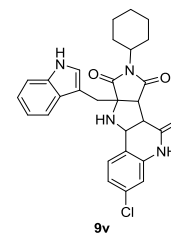

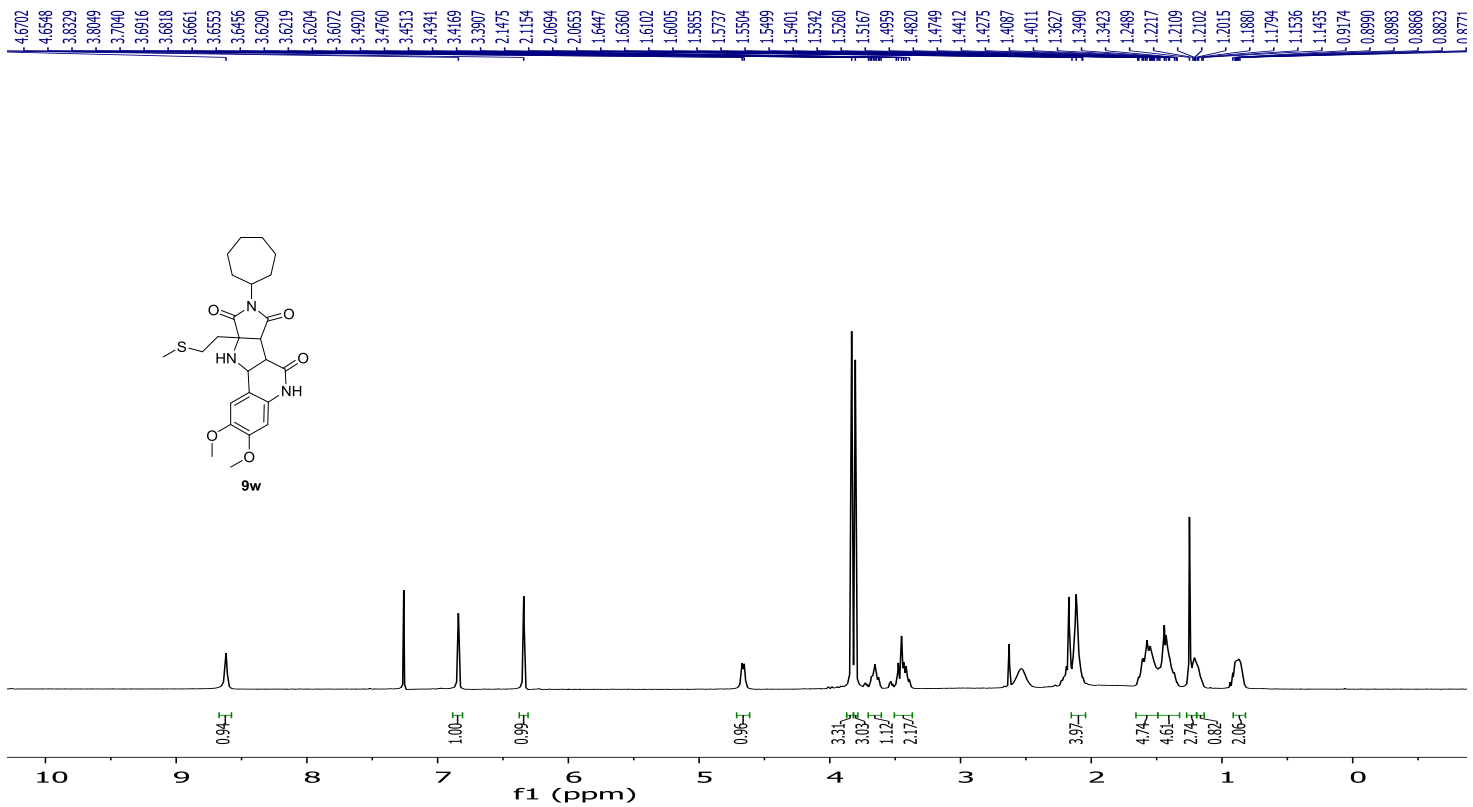

<sup>1</sup>H NMR of compound **9w** in CDCl<sub>3</sub>

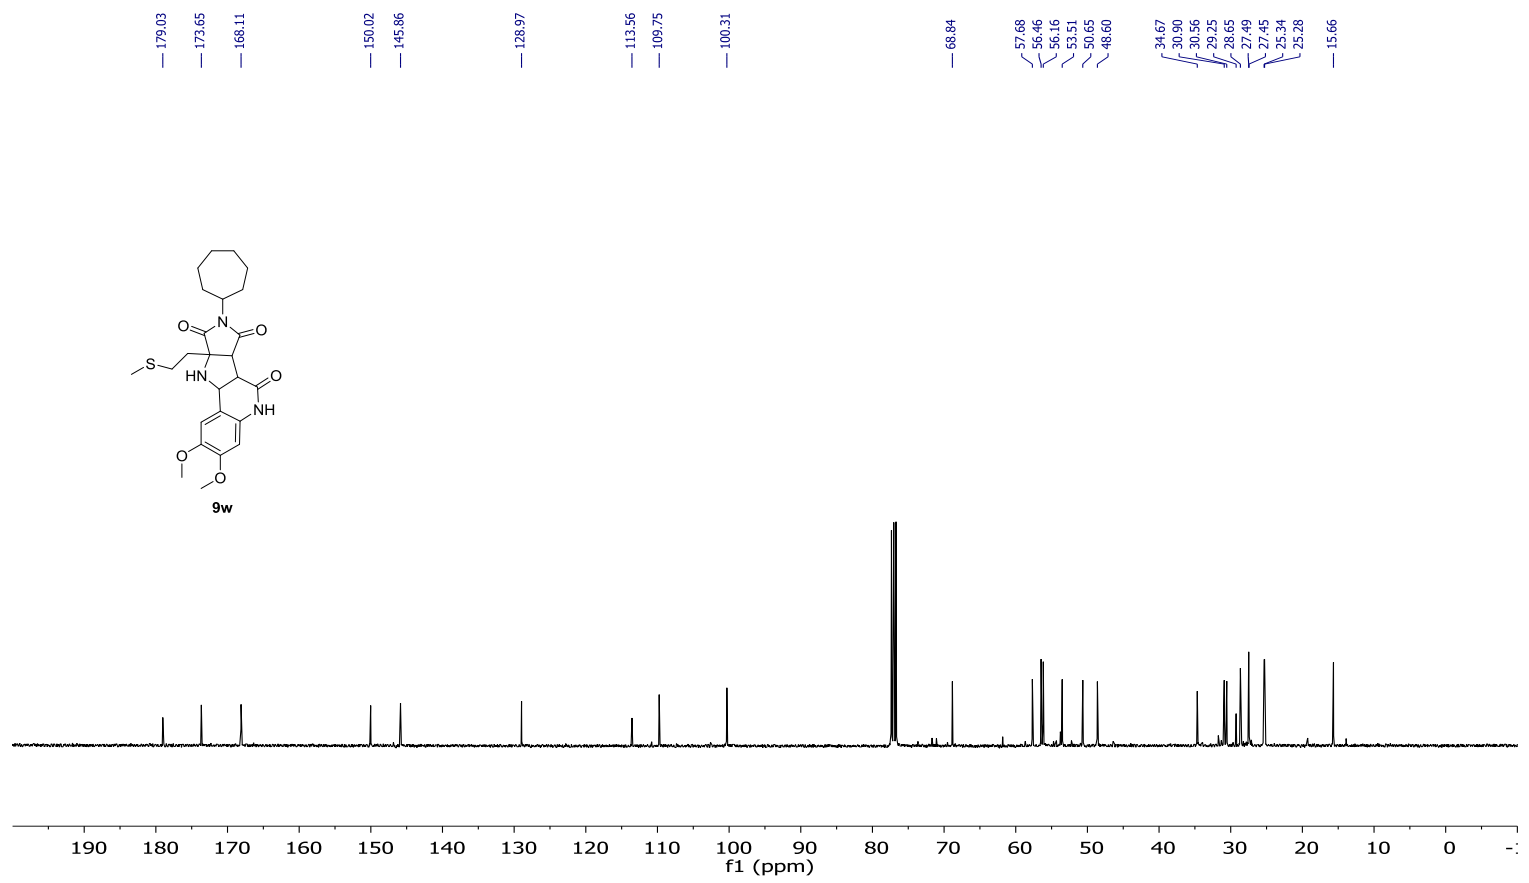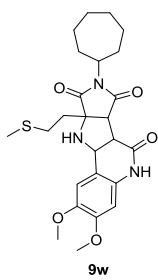

<sup>13</sup>C NMR of compound **9w** in CDCl<sub>3</sub>



## Display Report

| Meas. m/z | # | Ion Formula                                                     | m/z      | err [ppm] | mSigma | # Sigma | Score  | rdb  | e <sup>-</sup> Conf | N-Rule | Adduct |
|-----------|---|-----------------------------------------------------------------|----------|-----------|--------|---------|--------|------|---------------------|--------|--------|
| 488.2222  | 1 | C <sub>25</sub> H <sub>34</sub> N <sub>3</sub> O <sub>5</sub> S | 488.2214 | -1.8      | 28.2   | 1       | 100.00 | 10.5 | even                | ok     | M+H    |

HRMS (ESI) of compound **9w**

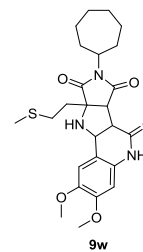

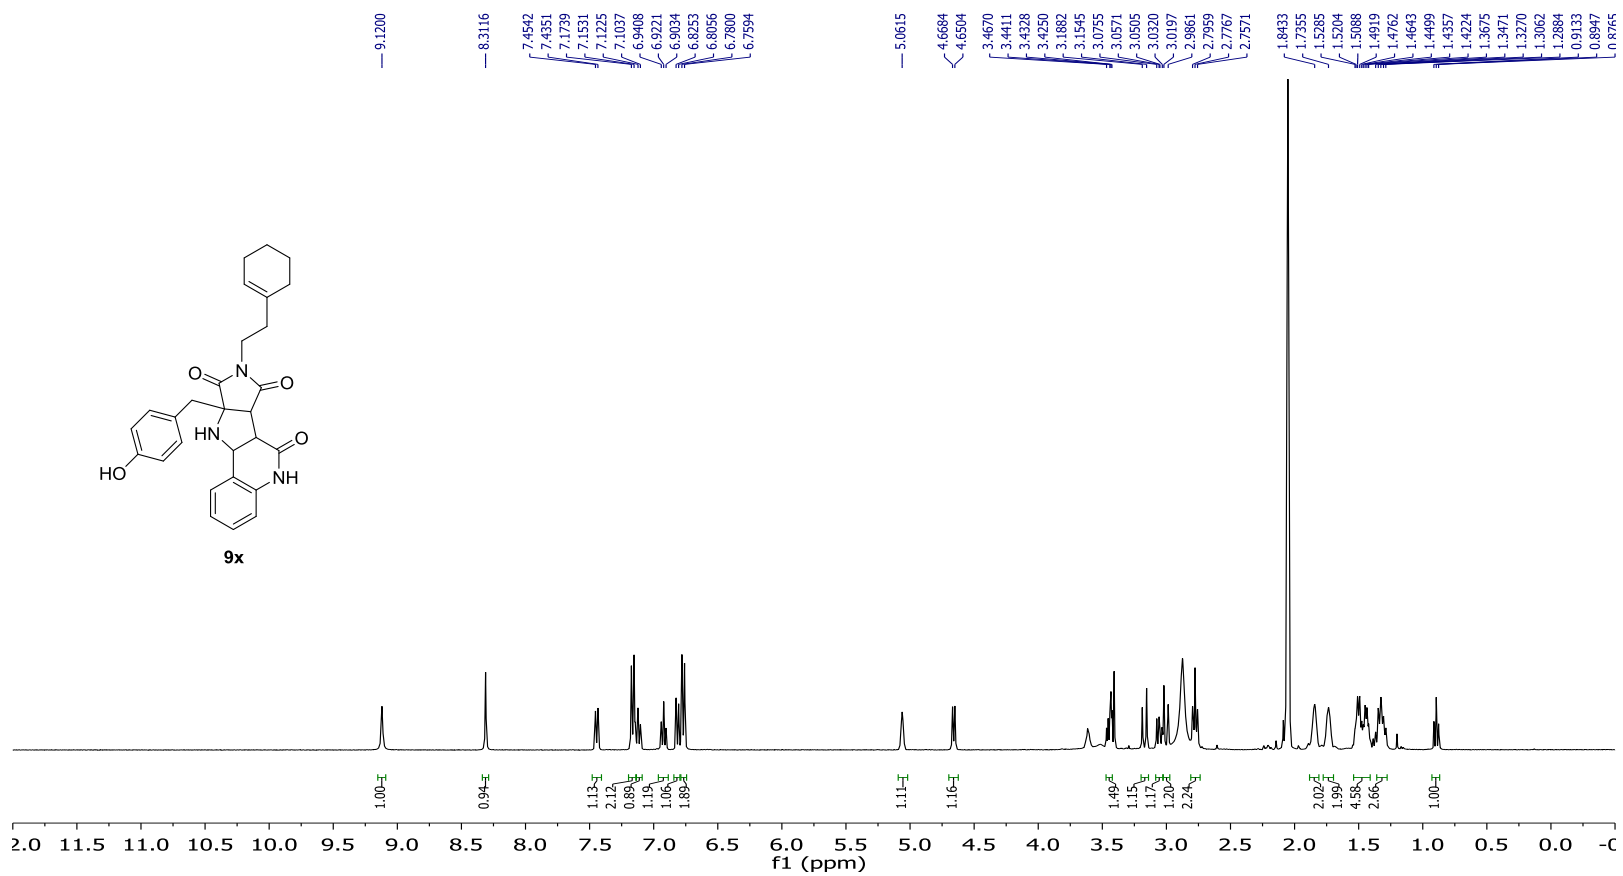

$^1\text{H}$  NMR (400 MHz) of compound **9x** in Acetone- $d_6$

$^{13}\text{C}$  NMR (101 MHz) of compound **9x** in

## Display Report

### Analysis Info

Analysis Name D:\Data\nctu service\data\2020\20200526\LYL-3057-1\_GB1\_01\_20619.d Acquisition Date 5/26/2020 12:06:20 PM  
Method Small molecule.m Operator NCTU  
Sample Name LYL-3057-1 Instrument impact HD 1819696.00164  
Comment

### Acquisition Parameter

|             |          |                      |          |                  |           |
|-------------|----------|----------------------|----------|------------------|-----------|
| Source Type | ESI      | Ion Polarity         | Positive | Set Nebulizer    | 1.0 Bar   |
| Focus       | Active   | Set Capillary        | 4500 V   | Set Dry Heater   | 200 °C    |
| Scan Begin  | 50 m/z   | Set End Plate Offset | -500 V   | Set Dry Gas      | 6.0 l/min |
| Scan End    | 1500 m/z | Set Charging Voltage | 2000 V   | Set Divert Valve | Waste     |
|             |          | Set Corona           | 0 nA     | Set APCI Heater  | 0 °C      |

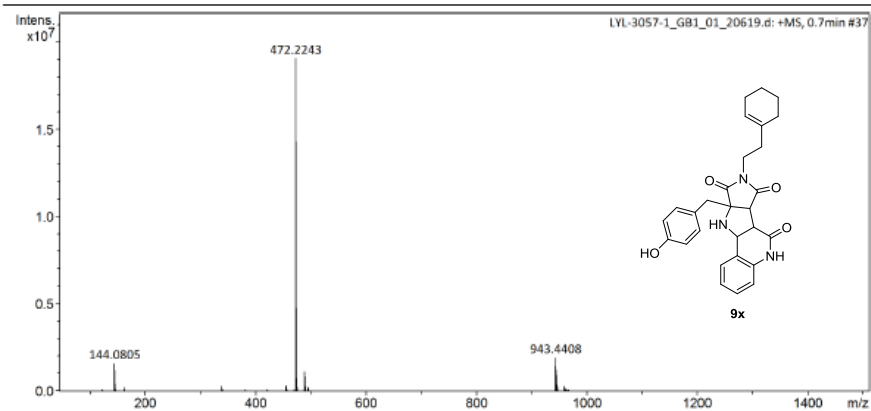

## Display Report

| Meas. m/z | # | Ion Formula                                                   | m/z      | err [ppm] | mSigma | # Sigma | Score  | rdb  | e <sup>-</sup> Conf | N-Rule | Adduct |
|-----------|---|---------------------------------------------------------------|----------|-----------|--------|---------|--------|------|---------------------|--------|--------|
| 472.2243  | 1 | C <sub>28</sub> H <sub>30</sub> N <sub>3</sub> O <sub>4</sub> | 472.2231 | -2.7      | 8.1    | 1       | 100.00 | 15.5 | even                | ok     | M+H    |

HRMS (ESI) of compound **9x**

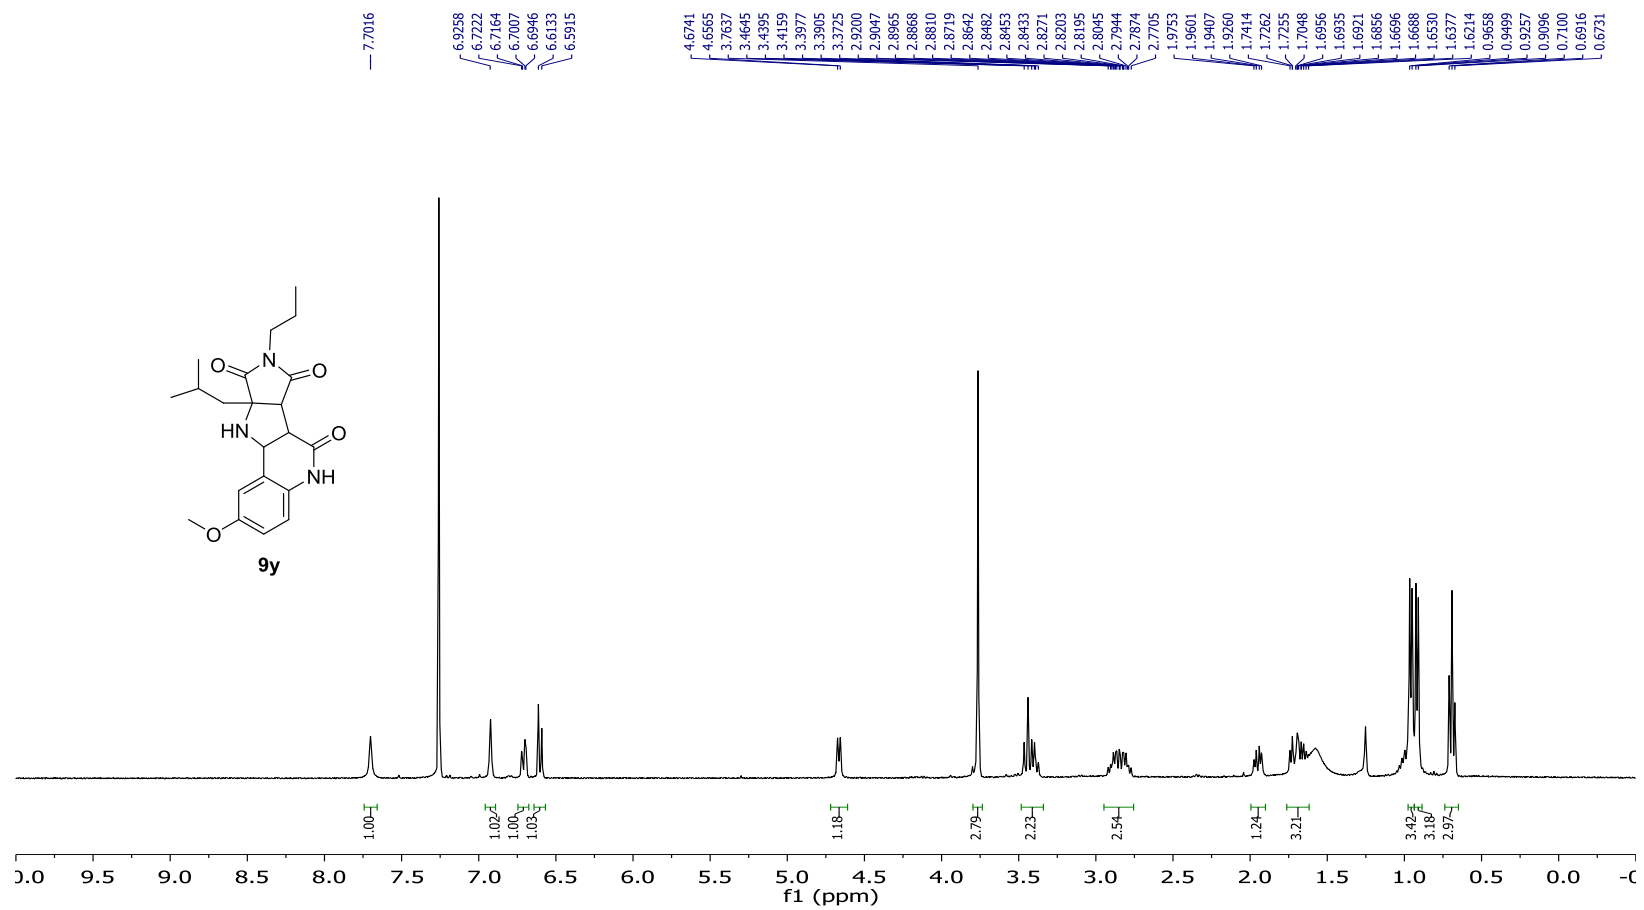

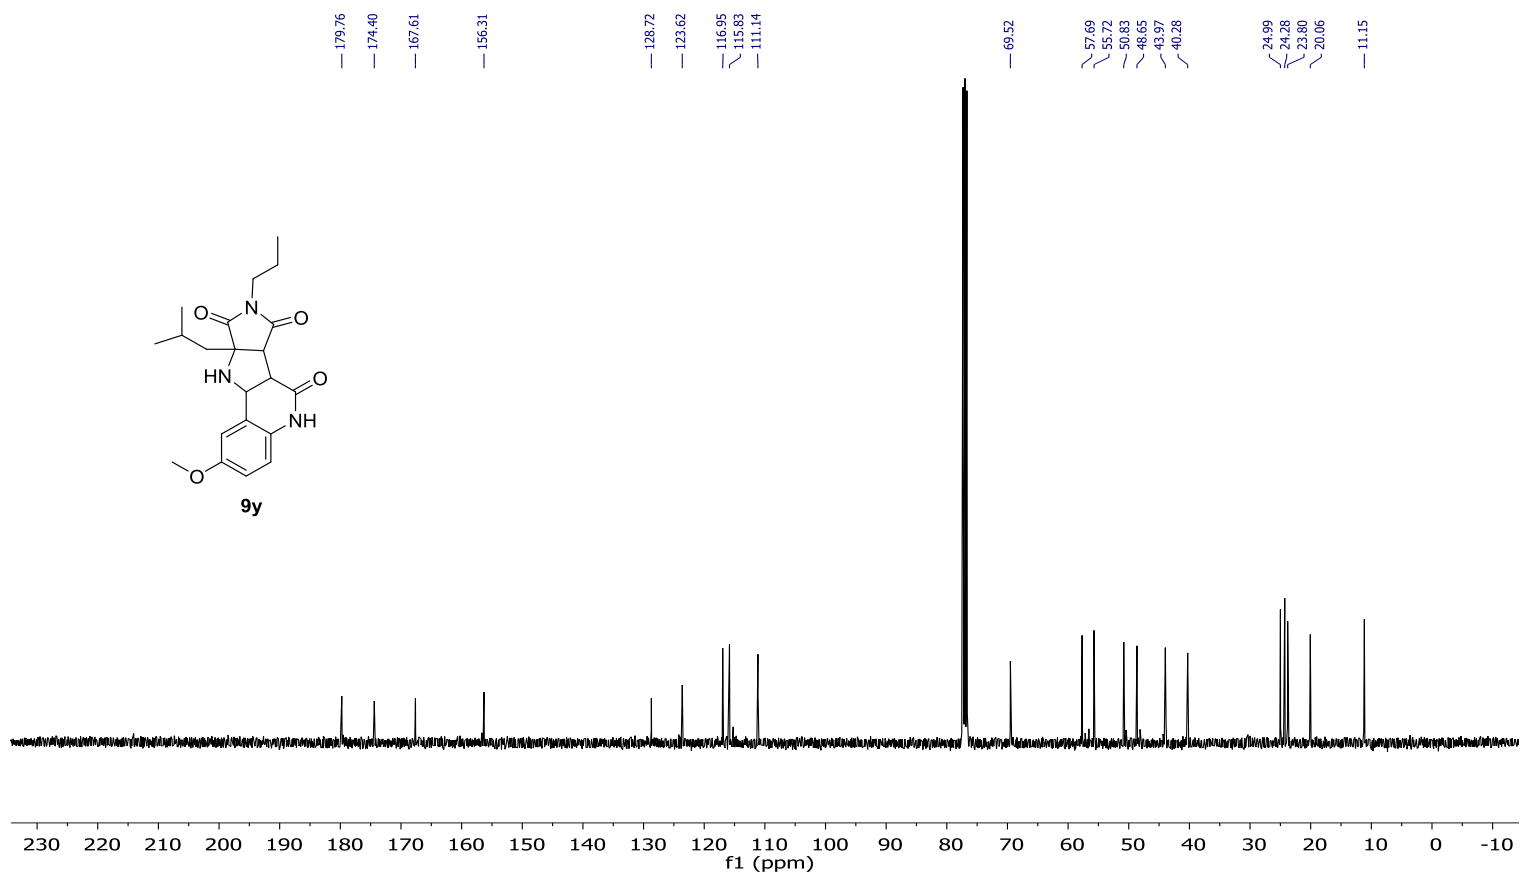

$^{13}\text{C}$  NMR (101 MHz) of compound **9y** in  $\text{CDCl}_3$

## Display Report

### Analysis Info

Analysis Name D:\Data\nctu service\data\2020\20200221\LYL-3010-P\_GA1\_01\_19822.d Acquisition Date 2/21/2020 12:53:44 PM  
Method Small molecule.m Operator NCTU  
Sample Name LYL-3010-P Instrument impact HD 1819606.00164  
Comment

### Acquisition Parameter

|             |          |                      |          |                  |           |
|-------------|----------|----------------------|----------|------------------|-----------|
| Source Type | ESI      | Ion Polarity         | Positive | Set Nebulizer    | 1.0 Bar   |
| Focus       | Active   | Set Capillary        | 4500 V   | Set Dry Heater   | 200 °C    |
| Scan Begin  | 50 m/z   | Set End Plate Offset | -500 V   | Set Dry Gas      | 6.0 l/min |
| Scan End    | 1500 m/z | Set Charging Voltage | 2000 V   | Set Divert Valve | Waste     |
|             |          | Set Corona           | 0 nA     | Set APCI Heater  | 0 °C      |

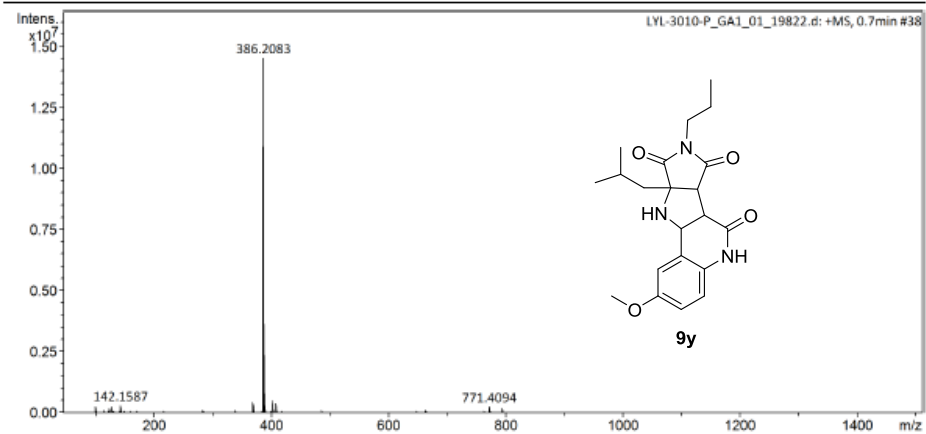

## Display Report

| Meas. m/z | # | Ion Formula                                                   | m/z      | err [ppm] | mSigma | # Sigma | Score  | rdb | e <sup>-</sup> Conf | N-Rule | Adduct |
|-----------|---|---------------------------------------------------------------|----------|-----------|--------|---------|--------|-----|---------------------|--------|--------|
| 386.2083  | 1 | C <sub>21</sub> H <sub>28</sub> N <sub>3</sub> O <sub>4</sub> | 386.2074 | -2.1      | 13.8   | 1       | 100.00 | 9.5 | even                | ok     | M+H    |

HRMS (ESI) of compound **9y**

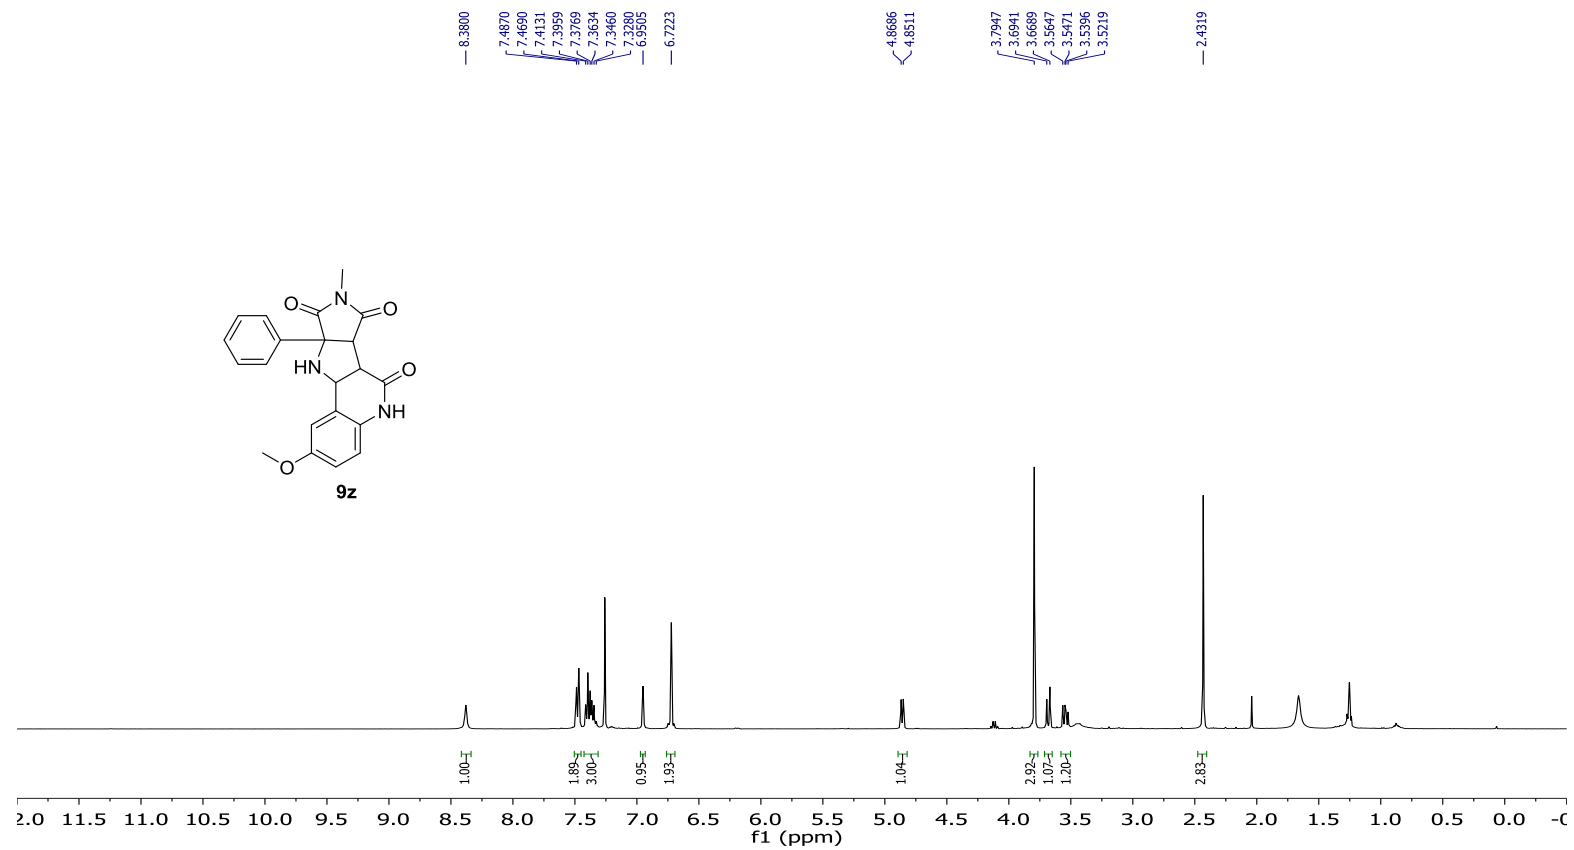

$^1\text{H NMR}$  (400 MHz) of compound **9z** in  $\text{CDCl}_3$



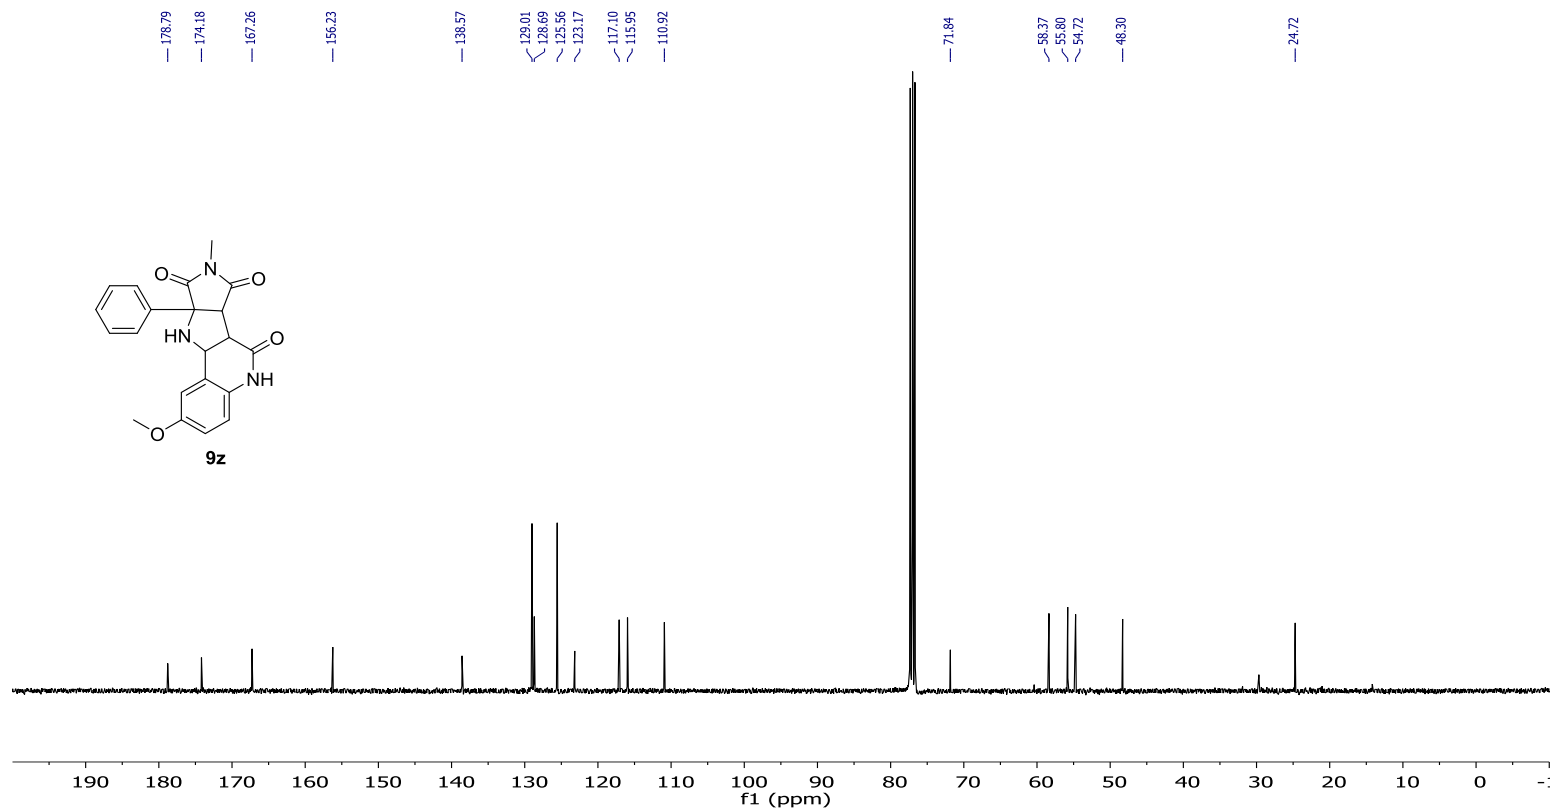

$^{13}\text{C}$  NMR (101 MHz) of compound **9z** in  $\text{CDCl}_3$

## Display Report

### Analysis Info

Analysis Name D:\Data\inotu service\data\2020\20200612\HYT-2021\_GA2\_01\_20825.d Acquisition Date 6/12/2020 12:52:24 PM  
Method Small molecule.m Operator NCTU  
Sample Name HYT-2021 Instrument impact HD 1819008.00164  
Comment

### Acquisition Parameter

|             |          |                      |          |                  |           |
|-------------|----------|----------------------|----------|------------------|-----------|
| Source Type | ESI      | Ion Polarity         | Positive | Set Nebulizer    | 1.0 Bar   |
| Focus       | Active   | Set Capillary        | 4500 V   | Set Dry Heater   | 200 °C    |
| Scan Begin  | 50 m/z   | Set End Plate Offset | -500 V   | Set Dry Gas      | 6.0 l/min |
| Scan End    | 1500 m/z | Set Charging Voltage | 2000 V   | Set Divert Valve | Waste     |
|             |          | Set Corona           | 0 nA     | Set APCI Heater  | 0 °C      |

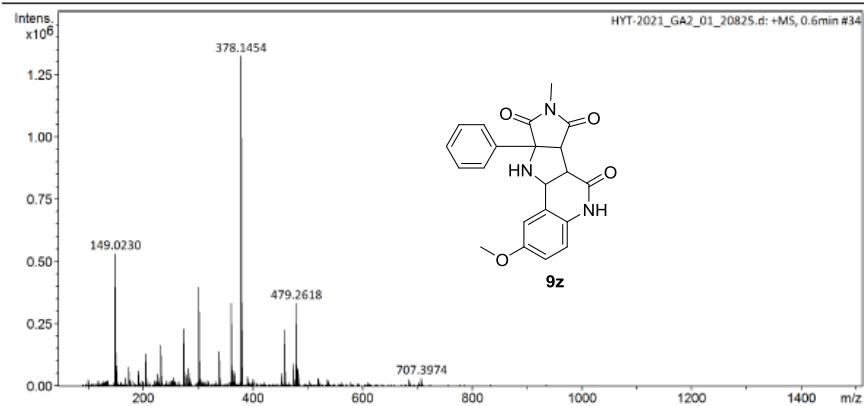

## Display Report

| Meas. m/z | # | Ion Formula                                                   | m/z      | err [ppm] | mSigma | # Sigma | Score  | rdb  | e <sup>-</sup> Conf | N-Rule | Adduct |
|-----------|---|---------------------------------------------------------------|----------|-----------|--------|---------|--------|------|---------------------|--------|--------|
| 378.1454  | 1 | C <sub>21</sub> H <sub>20</sub> N <sub>3</sub> O <sub>4</sub> | 378.1448 | -1.6      | 8.8    | 1       | 100.00 | 13.5 | even                | ok     | M+H    |

HRMS (ESI) of compound **9z**

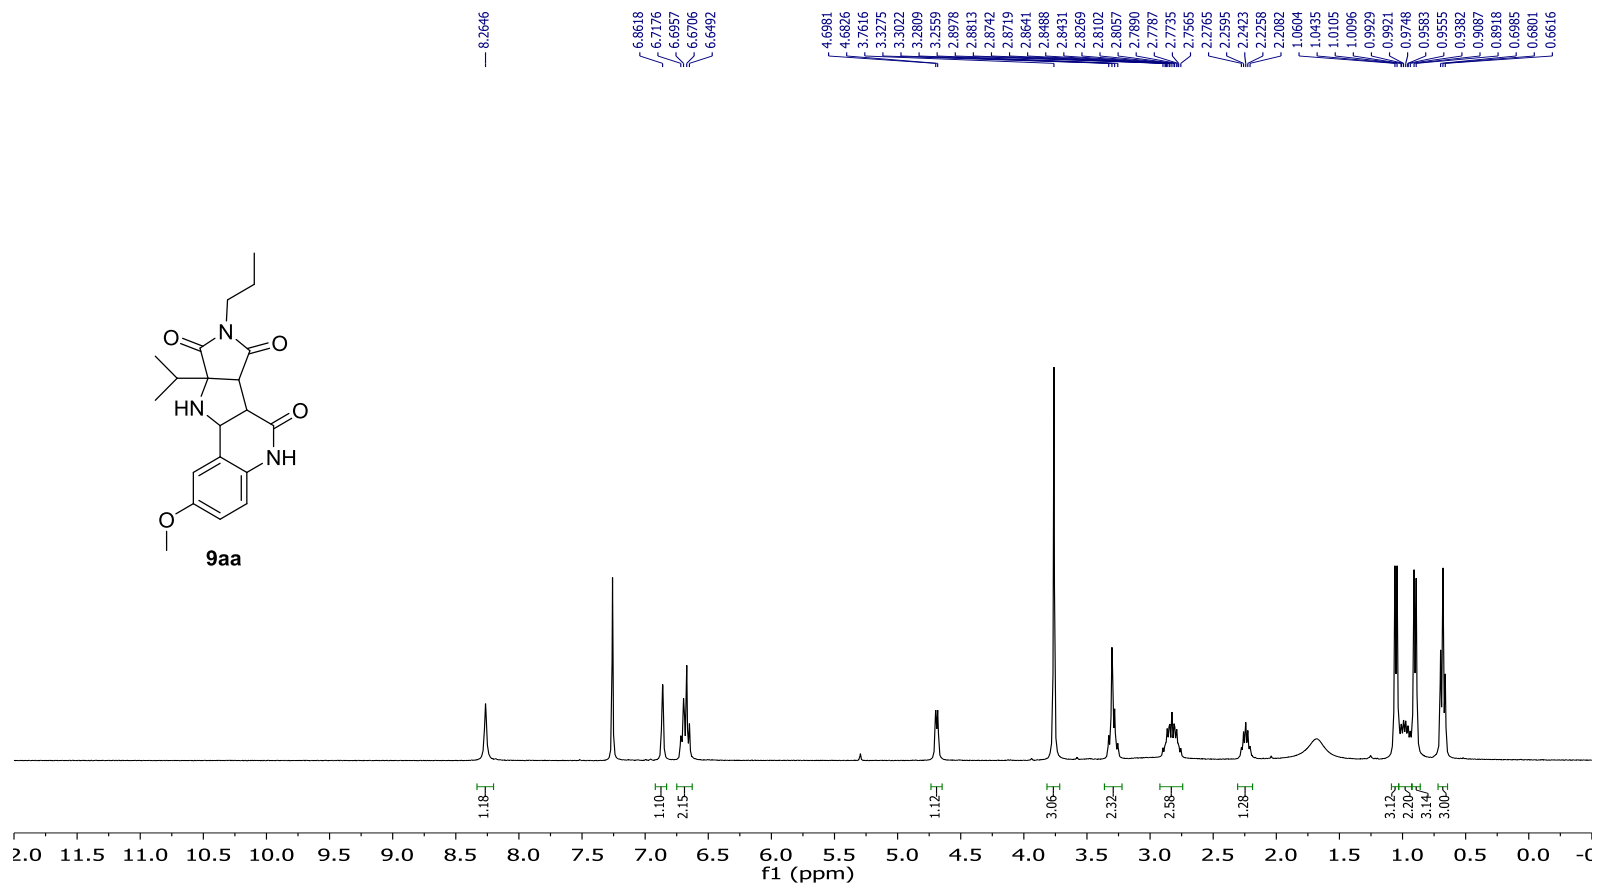

$^1\text{H NMR}$  (400 MHz) of compound **9aa** in  $\text{CDCl}_3$

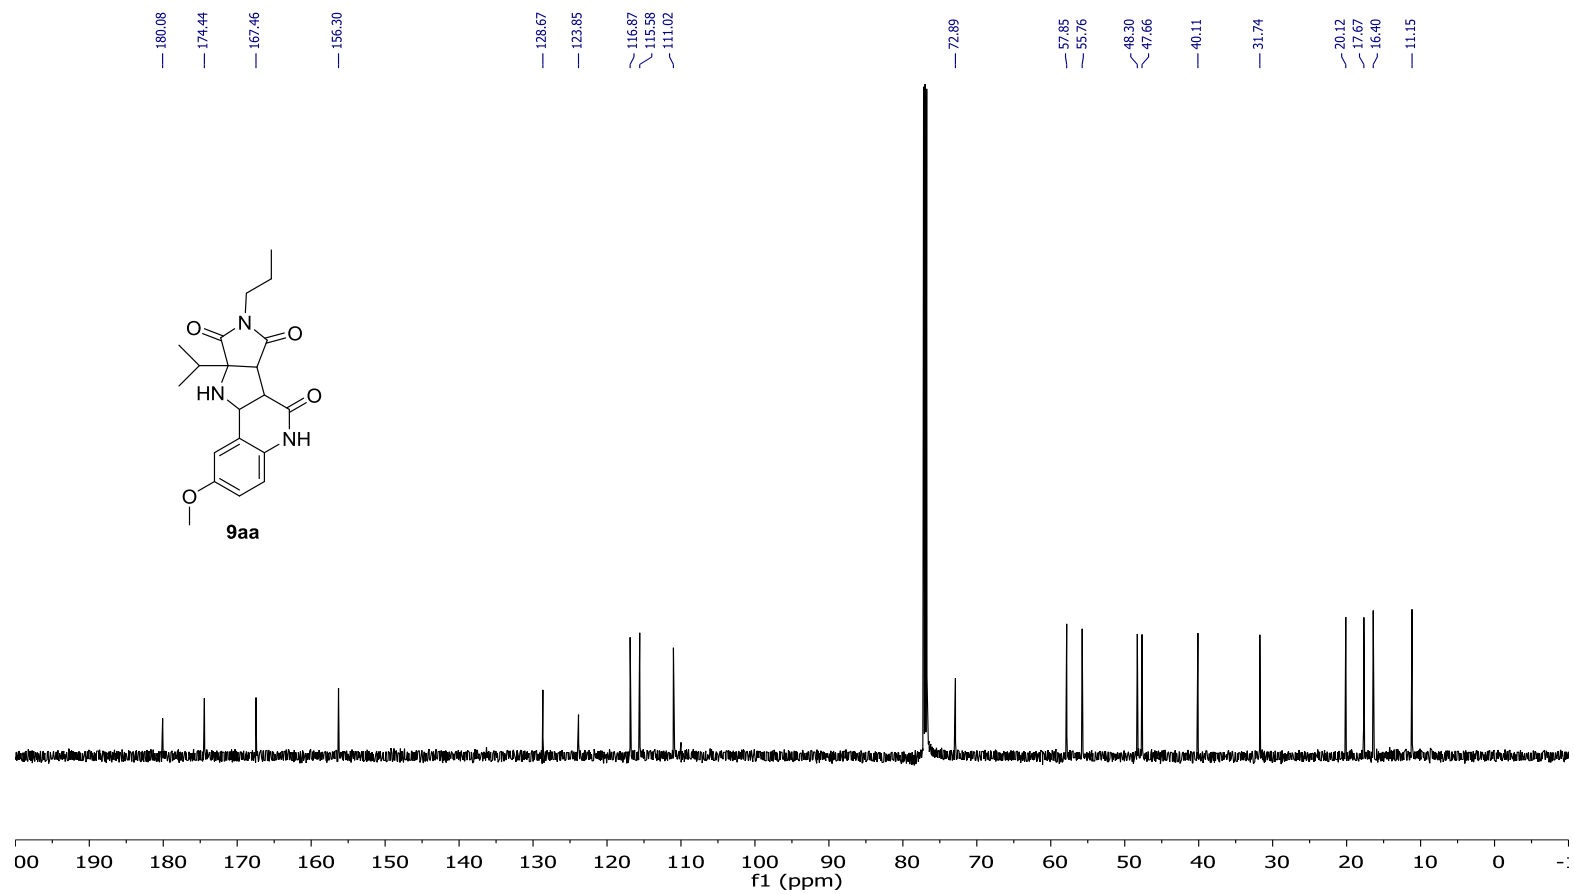

$^{13}\text{C}$  NMR (101 MHz) of compound **9aa** in  $\text{CDCl}_3$

## Display Report

**Analysis Info**  
Analysis Name D:\Data\ncu service\data\2020\20200612\HYT-2020\_GA1\_01\_20824.d  
Method Small molecule.m  
Sample Name HYT-2020  
Comment  
Acquisition Date 6/12/2020 12:48:07 PM  
Operator NCTU  
Instrument impact HD 1819696.00164

**Acquisition Parameter**  
Source Type ESI  
Focus Active  
Scan Begin 50 m/z  
Scan End 1500 m/z  
Ion Polarity Positive  
Set Capillary 4500 V  
Set End Plate Offset -500 V  
Set Charging Voltage 2000 V  
Set Corona 0 nA  
Set Nebulizer 1.0 Bar  
Set Dry Heater 200 °C  
Set Dry Gas 6.0 l/min  
Set Divert Valve Waste  
Set APCI Heater 0 °C

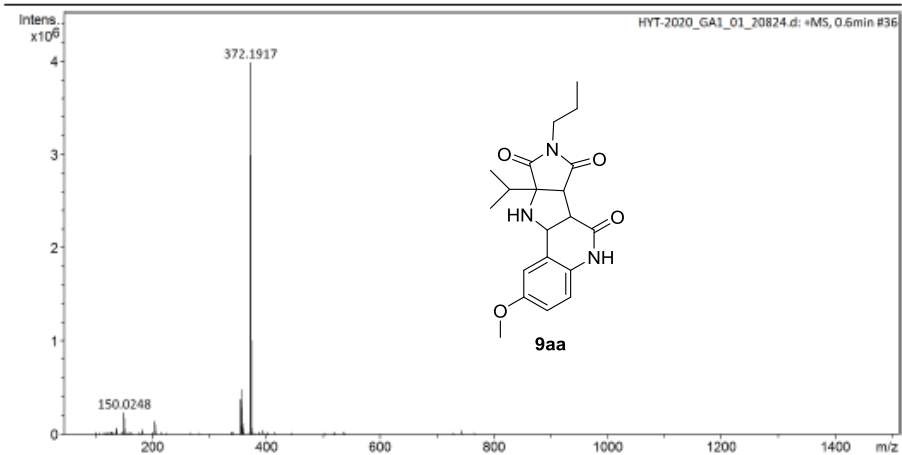

## Display Report

| Meas. m/z | # | Ion Formula                                                   | m/z      | err [ppm] | mSigma | # Sigma | Score  | rdB | e <sup>-</sup> Conf | N-Rule | Adduct |
|-----------|---|---------------------------------------------------------------|----------|-----------|--------|---------|--------|-----|---------------------|--------|--------|
| 372.1917  | 1 | C <sub>20</sub> H <sub>26</sub> N <sub>3</sub> O <sub>4</sub> | 372.1918 | -0.3      | 20.8   | 1       | 100.00 | 9.5 | even                | ok     | M+H    |

HRMS (ESI) of compound **9aa**

## X-ray crystallographic data of compound **6b**

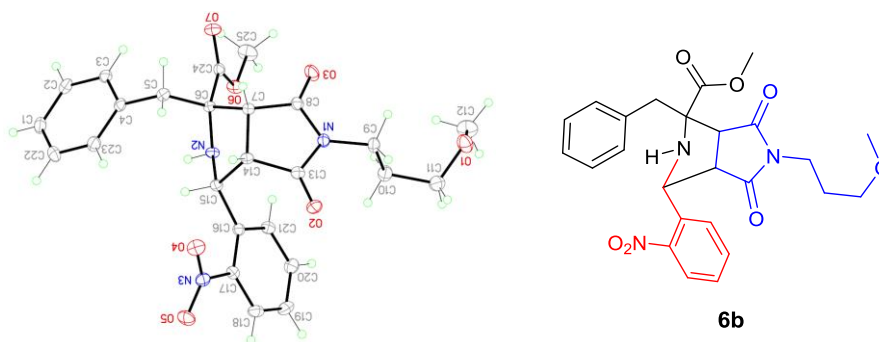

**ORTEP diagram of compound 6b.** Atomic displacement ellipsoids are drawn at the 50% probability level

CCDC No. 1985032

Table 1. Crystal data and structure refinement for 191240lt\_0m.

|                                 |                                                                                                            |
|---------------------------------|------------------------------------------------------------------------------------------------------------|
| Identification code             | 191240lt_0m                                                                                                |
| Empirical formula               | C <sub>25</sub> H <sub>27</sub> N <sub>3</sub> O <sub>7</sub>                                              |
| Formula weight                  | 481.49                                                                                                     |
| Temperature                     | 100(2) K                                                                                                   |
| Wavelength                      | 0.71073 Å                                                                                                  |
| Crystal system                  | Monoclinic                                                                                                 |
| Space group                     | P2 <sub>1</sub> /n                                                                                         |
| Unit cell dimensions            | a = 10.5539(6) Å      α = 90°.<br>b = 21.1479(12) Å     β = 108.937(3)°.<br>c = 10.7227(6) Å      γ = 90°. |
| Volume                          | 2263.7(2) Å <sup>3</sup>                                                                                   |
| Z                               | 4                                                                                                          |
| Density (calculated)            | 1.413 Mg/m <sup>3</sup>                                                                                    |
| Absorption coefficient          | 0.104 mm <sup>-1</sup>                                                                                     |
| F(000)                          | 1016                                                                                                       |
| Crystal size                    | 0.10 x 0.10 x 0.08 mm <sup>3</sup>                                                                         |
| Theta range for data collection | 1.926 to 26.394°.                                                                                          |
| Index ranges                    | -12 ≤ h ≤ 13, -26 ≤ k ≤ 26, -13 ≤ l ≤ 12                                                                   |
| Reflections collected           | 18444                                                                                                      |
| Independent reflections         | 4640 [R(int) = 0.0332]                                                                                     |
| Completeness to theta = 25.242° | 99.9 %                                                                                                     |
| Absorption correction           | Semi-empirical from equivalents                                                                            |

|                                   |                                             |
|-----------------------------------|---------------------------------------------|
| Max. and min. transmission        | 0.7454 and 0.6931                           |
| Refinement method                 | Full-matrix least-squares on F <sup>2</sup> |
| Data / restraints / parameters    | 4640 / 0 / 318                              |
| Goodness-of-fit on F <sup>2</sup> | 1.060                                       |
| Final R indices [I>2sigma(I)]     | R1 = 0.0402, wR2 = 0.1008                   |
| R indices (all data)              | R1 = 0.0526, wR2 = 0.1080                   |
| Extinction coefficient            | n/a                                         |
| Largest diff. peak and hole       | 0.507 and -0.240 e.Å <sup>-3</sup>          |

Table 2. Atomic coordinates ( $\times 10^4$ ) and equivalent isotropic displacement parameters ( $\text{\AA}^2 \times 10^3$ ) for 191240lt\_0m.  $U(\text{eq})$  is defined as one third of the trace of the orthogonalized  $U^{ij}$  tensor.

|       | x       | y       | z        | U(eq) |
|-------|---------|---------|----------|-------|
| O(1)  | 2937(1) | 660(1)  | 6068(1)  | 25(1) |
| O(2)  | 1090(1) | 1486(1) | 886(1)   | 20(1) |
| O(3)  | 5311(1) | 1875(1) | 3626(1)  | 23(1) |
| O(4)  | 1043(1) | 1563(1) | -2506(1) | 23(1) |
| O(5)  | 112(1)  | 755(1)  | -3676(1) | 25(1) |
| O(6)  | 7063(1) | 1223(1) | 2286(1)  | 18(1) |
| O(7)  | 7513(1) | 2260(1) | 2315(1)  | 19(1) |
| N(1)  | 3118(1) | 1637(1) | 2489(1)  | 15(1) |
| N(2)  | 4861(1) | 1272(1) | 263(1)   | 13(1) |
| N(3)  | 847(1)  | 994(1)  | -2649(1) | 17(1) |
| C(1)  | 7626(2) | 1570(1) | -2824(2) | 20(1) |
| C(2)  | 8363(2) | 1757(1) | -1555(2) | 18(1) |
| C(3)  | 7717(2) | 2010(1) | -726(2)  | 16(1) |
| C(4)  | 6332(2) | 2084(1) | -1156(2) | 14(1) |
| C(5)  | 5605(2) | 2359(1) | -274(2)  | 14(1) |
| C(6)  | 5437(2) | 1886(1) | 768(2)   | 12(1) |
| C(7)  | 4336(2) | 2145(1) | 1290(2)  | 13(1) |
| C(8)  | 4373(2) | 1877(1) | 2614(2)  | 15(1) |
| C(9)  | 2720(2) | 1399(1) | 3590(2)  | 17(1) |
| C(10) | 2869(2) | 685(1)  | 3740(2)  | 21(1) |
| C(11) | 2282(2) | 431(1)  | 4763(2)  | 26(1) |
| C(12) | 4102(2) | 312(1)  | 6737(2)  | 29(1) |
| C(13) | 2247(2) | 1653(1) | 1204(2)  | 14(1) |
| C(14) | 3006(2) | 1898(1) | 317(2)   | 12(1) |
| C(15) | 3436(2) | 1362(1) | -487(2)  | 12(1) |
| C(16) | 2684(2) | 740(1)  | -554(2)  | 13(1) |
| C(17) | 1491(2) | 574(1)  | -1536(2) | 14(1) |
| C(18) | 822(2)  | 10(1)   | -1511(2) | 19(1) |
| C(19) | 1333(2) | -412(1) | -492(2)  | 20(1) |
| C(20) | 2530(2) | -271(1) | 484(2)   | 18(1) |
| C(21) | 3194(2) | 292(1)  | 441(2)   | 16(1) |
| C(22) | 6249(2) | 1643(1) | -3267(2) | 23(1) |
| C(23) | 5605(2) | 1898(1) | -2436(2) | 20(1) |



|       |         |         |         |       |
|-------|---------|---------|---------|-------|
| C(24) | 6783(2) | 1820(1) | 1875(2) | 13(1) |
| C(25) | 8281(2) | 1153(1) | 3386(2) | 25(1) |

---

Table 3. Bond lengths [ $\text{\AA}$ ] and angles [ $^\circ$ ] for 191240lt\_0m.

---

|            |            |
|------------|------------|
| O(1)-C(12) | 1.413(2)   |
| O(1)-C(11) | 1.429(2)   |
| O(2)-C(13) | 1.2095(19) |
| O(3)-C(8)  | 1.208(2)   |
| O(4)-N(3)  | 1.2211(18) |
| O(5)-N(3)  | 1.2317(18) |
| O(6)-C(24) | 1.3384(19) |
| O(6)-C(25) | 1.4425(19) |
| O(7)-C(24) | 1.2023(19) |
| N(1)-C(8)  | 1.384(2)   |
| N(1)-C(13) | 1.386(2)   |
| N(1)-C(9)  | 1.4644(19) |
| N(2)-C(6)  | 1.4623(19) |
| N(2)-C(15) | 1.4694(19) |
| N(2)-H(11) | 0.9502     |
| N(3)-C(17) | 1.466(2)   |
| C(1)-C(22) | 1.383(3)   |
| C(1)-C(2)  | 1.388(2)   |
| C(1)-H(1)  | 0.9500     |
| C(2)-C(3)  | 1.391(2)   |
| C(2)-H(17) | 0.9500     |
| C(3)-C(4)  | 1.392(2)   |
| C(3)-H(14) | 0.9500     |
| C(4)-C(23) | 1.395(2)   |
| C(4)-C(5)  | 1.514(2)   |
| C(5)-C(6)  | 1.551(2)   |
| C(5)-H(18) | 0.9900     |
| C(5)-H(13) | 0.9900     |
| C(6)-C(24) | 1.533(2)   |
| C(6)-C(7)  | 1.544(2)   |
| C(7)-C(8)  | 1.517(2)   |
| C(7)-C(14) | 1.544(2)   |
| C(7)-H(5)  | 1.0000     |
| C(9)-C(10) | 1.520(2)   |
| C(9)-H(23) | 0.9900     |
| C(9)-H(24) | 0.9900     |

|                  |            |
|------------------|------------|
| C(10)-C(11)      | 1.522(2)   |
| C(10)-H(25)      | 0.9900     |
| C(10)-H(4)       | 0.9900     |
| C(11)-H(27)      | 0.9900     |
| C(11)-H(26)      | 0.9900     |
| C(12)-H(28)      | 0.9800     |
| C(12)-H(2)       | 0.9800     |
| C(12)-H(3)       | 0.9800     |
| C(13)-C(14)      | 1.520(2)   |
| C(14)-C(15)      | 1.577(2)   |
| C(14)-H(22)      | 1.0000     |
| C(15)-C(16)      | 1.527(2)   |
| C(15)-H(6)       | 1.0000     |
| C(16)-C(21)      | 1.397(2)   |
| C(16)-C(17)      | 1.399(2)   |
| C(17)-C(18)      | 1.390(2)   |
| C(18)-C(19)      | 1.378(2)   |
| C(18)-H(10)      | 0.9500     |
| C(19)-C(20)      | 1.387(2)   |
| C(19)-H(9)       | 0.9500     |
| C(20)-C(21)      | 1.390(2)   |
| C(20)-H(8)       | 0.9500     |
| C(21)-H(7)       | 0.9500     |
| C(22)-C(23)      | 1.393(2)   |
| C(22)-H(15)      | 0.9500     |
| C(23)-H(16)      | 0.9500     |
| C(25)-H(20)      | 0.9800     |
| C(25)-H(21)      | 0.9800     |
| C(25)-H(19)      | 0.9800     |
|                  |            |
| C(12)-O(1)-C(11) | 112.69(14) |
| C(24)-O(6)-C(25) | 114.17(13) |
| C(8)-N(1)-C(13)  | 113.11(13) |
| C(8)-N(1)-C(9)   | 124.32(13) |
| C(13)-N(1)-C(9)  | 122.56(13) |
| C(6)-N(2)-C(15)  | 108.42(11) |
| C(6)-N(2)-H(11)  | 112.8      |
| C(15)-N(2)-H(11) | 114.3      |

|                  |            |
|------------------|------------|
| O(4)-N(3)-O(5)   | 123.22(14) |
| O(4)-N(3)-C(17)  | 118.74(13) |
| O(5)-N(3)-C(17)  | 118.03(14) |
| C(22)-C(1)-C(2)  | 119.80(15) |
| C(22)-C(1)-H(1)  | 120.1      |
| C(2)-C(1)-H(1)   | 120.1      |
| C(1)-C(2)-C(3)   | 120.07(16) |
| C(1)-C(2)-H(17)  | 120.0      |
| C(3)-C(2)-H(17)  | 120.0      |
| C(2)-C(3)-C(4)   | 120.78(15) |
| C(2)-C(3)-H(14)  | 119.6      |
| C(4)-C(3)-H(14)  | 119.6      |
| C(3)-C(4)-C(23)  | 118.51(15) |
| C(3)-C(4)-C(5)   | 121.79(14) |
| C(23)-C(4)-C(5)  | 119.69(14) |
| C(4)-C(5)-C(6)   | 113.71(12) |
| C(4)-C(5)-H(18)  | 108.8      |
| C(6)-C(5)-H(18)  | 108.8      |
| C(4)-C(5)-H(13)  | 108.8      |
| C(6)-C(5)-H(13)  | 108.8      |
| H(18)-C(5)-H(13) | 107.7      |
| N(2)-C(6)-C(24)  | 112.03(12) |
| N(2)-C(6)-C(7)   | 100.28(12) |
| C(24)-C(6)-C(7)  | 111.64(12) |
| N(2)-C(6)-C(5)   | 115.87(12) |
| C(24)-C(6)-C(5)  | 108.79(12) |
| C(7)-C(6)-C(5)   | 107.94(12) |
| C(8)-C(7)-C(14)  | 104.31(12) |
| C(8)-C(7)-C(6)   | 114.35(13) |
| C(14)-C(7)-C(6)  | 105.12(12) |
| C(8)-C(7)-H(5)   | 110.9      |
| C(14)-C(7)-H(5)  | 110.9      |
| C(6)-C(7)-H(5)   | 110.9      |
| O(3)-C(8)-N(1)   | 124.40(14) |
| O(3)-C(8)-C(7)   | 127.31(15) |
| N(1)-C(8)-C(7)   | 108.27(13) |
| N(1)-C(9)-C(10)  | 112.33(13) |
| N(1)-C(9)-H(23)  | 109.1      |

|                   |            |
|-------------------|------------|
| C(10)-C(9)-H(23)  | 109.1      |
| N(1)-C(9)-H(24)   | 109.1      |
| C(10)-C(9)-H(24)  | 109.1      |
| H(23)-C(9)-H(24)  | 107.9      |
| C(9)-C(10)-C(11)  | 112.04(14) |
| C(9)-C(10)-H(25)  | 109.2      |
| C(11)-C(10)-H(25) | 109.2      |
| C(9)-C(10)-H(4)   | 109.2      |
| C(11)-C(10)-H(4)  | 109.2      |
| H(25)-C(10)-H(4)  | 107.9      |
| O(1)-C(11)-C(10)  | 113.86(14) |
| O(1)-C(11)-H(27)  | 108.8      |
| C(10)-C(11)-H(27) | 108.8      |
| O(1)-C(11)-H(26)  | 108.8      |
| C(10)-C(11)-H(26) | 108.8      |
| H(27)-C(11)-H(26) | 107.7      |
| O(1)-C(12)-H(28)  | 109.5      |
| O(1)-C(12)-H(2)   | 109.5      |
| H(28)-C(12)-H(2)  | 109.5      |
| O(1)-C(12)-H(3)   | 109.5      |
| H(28)-C(12)-H(3)  | 109.5      |
| H(2)-C(12)-H(3)   | 109.5      |
| O(2)-C(13)-N(1)   | 123.84(14) |
| O(2)-C(13)-C(14)  | 127.72(14) |
| N(1)-C(13)-C(14)  | 108.44(13) |
| C(13)-C(14)-C(7)  | 103.93(12) |
| C(13)-C(14)-C(15) | 113.60(12) |
| C(7)-C(14)-C(15)  | 104.67(12) |
| C(13)-C(14)-H(22) | 111.4      |
| C(7)-C(14)-H(22)  | 111.4      |
| C(15)-C(14)-H(22) | 111.4      |
| N(2)-C(15)-C(16)  | 109.75(12) |
| N(2)-C(15)-C(14)  | 102.65(11) |
| C(16)-C(15)-C(14) | 114.07(12) |
| N(2)-C(15)-H(6)   | 110.0      |
| C(16)-C(15)-H(6)  | 110.0      |
| C(14)-C(15)-H(6)  | 110.0      |
| C(21)-C(16)-C(17) | 115.76(14) |

|                   |            |
|-------------------|------------|
| C(21)-C(16)-C(15) | 118.86(14) |
| C(17)-C(16)-C(15) | 125.37(14) |
| C(18)-C(17)-C(16) | 122.63(15) |
| C(18)-C(17)-N(3)  | 115.58(14) |
| C(16)-C(17)-N(3)  | 121.77(14) |
| C(19)-C(18)-C(17) | 120.05(15) |
| C(19)-C(18)-H(10) | 120.0      |
| C(17)-C(18)-H(10) | 120.0      |
| C(18)-C(19)-C(20) | 118.99(15) |
| C(18)-C(19)-H(9)  | 120.5      |
| C(20)-C(19)-H(9)  | 120.5      |
| C(19)-C(20)-C(21) | 120.35(15) |
| C(19)-C(20)-H(8)  | 119.8      |
| C(21)-C(20)-H(8)  | 119.8      |
| C(20)-C(21)-C(16) | 122.15(15) |
| C(20)-C(21)-H(7)  | 118.9      |
| C(16)-C(21)-H(7)  | 118.9      |
| C(1)-C(22)-C(23)  | 120.02(16) |
| C(1)-C(22)-H(15)  | 120.0      |
| C(23)-C(22)-H(15) | 120.0      |
| C(22)-C(23)-C(4)  | 120.81(16) |
| C(22)-C(23)-H(16) | 119.6      |
| C(4)-C(23)-H(16)  | 119.6      |
| O(7)-C(24)-O(6)   | 123.73(14) |
| O(7)-C(24)-C(6)   | 123.23(14) |
| O(6)-C(24)-C(6)   | 113.04(13) |
| O(6)-C(25)-H(20)  | 109.5      |
| O(6)-C(25)-H(21)  | 109.5      |
| H(20)-C(25)-H(21) | 109.5      |
| O(6)-C(25)-H(19)  | 109.5      |
| H(20)-C(25)-H(19) | 109.5      |
| H(21)-C(25)-H(19) | 109.5      |

---

Symmetry transformations used to generate equivalent atoms:

Table 4. Anisotropic displacement parameters ( $\text{\AA}^2 \times 10^3$ ) for 191240lt\_0m. The anisotropic displacement factor exponent takes the form:  $-2\pi^2 [ h^2 a^* U^{11} + \dots + 2 h k a^* b^* U^{12} ]$

|       | U <sup>11</sup> | U <sup>22</sup> | U <sup>33</sup> | U <sup>23</sup> | U <sup>13</sup> | U <sup>12</sup> |
|-------|-----------------|-----------------|-----------------|-----------------|-----------------|-----------------|
| O(1)  | 23(1)           | 34(1)           | 18(1)           | 2(1)            | 5(1)            | 4(1)            |
| O(2)  | 13(1)           | 25(1)           | 22(1)           | -2(1)           | 6(1)            | -4(1)           |
| O(3)  | 16(1)           | 40(1)           | 12(1)           | -1(1)           | 2(1)            | -1(1)           |
| O(4)  | 20(1)           | 19(1)           | 26(1)           | 3(1)            | 4(1)            | 2(1)            |
| O(5)  | 18(1)           | 36(1)           | 16(1)           | -2(1)           | -2(1)           | -2(1)           |
| O(6)  | 16(1)           | 16(1)           | 16(1)           | 2(1)            | -1(1)           | 2(1)            |
| O(7)  | 15(1)           | 19(1)           | 20(1)           | -2(1)           | 2(1)            | -4(1)           |
| N(1)  | 14(1)           | 17(1)           | 13(1)           | 0(1)            | 6(1)            | 0(1)            |
| N(2)  | 11(1)           | 13(1)           | 14(1)           | -2(1)           | 2(1)            | -1(1)           |
| N(3)  | 11(1)           | 22(1)           | 18(1)           | 0(1)            | 4(1)            | 0(1)            |
| C(1)  | 24(1)           | 22(1)           | 19(1)           | 2(1)            | 12(1)           | -1(1)           |
| C(2)  | 14(1)           | 19(1)           | 21(1)           | 6(1)            | 7(1)            | 0(1)            |
| C(3)  | 16(1)           | 16(1)           | 14(1)           | 2(1)            | 4(1)            | -3(1)           |
| C(4)  | 16(1)           | 12(1)           | 14(1)           | 4(1)            | 5(1)            | -1(1)           |
| C(5)  | 13(1)           | 14(1)           | 15(1)           | 2(1)            | 3(1)            | 1(1)            |
| C(6)  | 11(1)           | 12(1)           | 12(1)           | 0(1)            | 3(1)            | -1(1)           |
| C(7)  | 13(1)           | 14(1)           | 13(1)           | -1(1)           | 4(1)            | -1(1)           |
| C(8)  | 14(1)           | 16(1)           | 15(1)           | -3(1)           | 6(1)            | 0(1)            |
| C(9)  | 18(1)           | 21(1)           | 16(1)           | 1(1)            | 9(1)            | 0(1)            |
| C(10) | 23(1)           | 22(1)           | 21(1)           | 1(1)            | 10(1)           | -1(1)           |
| C(11) | 27(1)           | 29(1)           | 19(1)           | 3(1)            | 5(1)            | -8(1)           |
| C(12) | 22(1)           | 30(1)           | 30(1)           | 2(1)            | 2(1)            | 3(1)            |
| C(13) | 14(1)           | 12(1)           | 16(1)           | -1(1)           | 5(1)            | 2(1)            |
| C(14) | 11(1)           | 12(1)           | 14(1)           | 0(1)            | 3(1)            | 0(1)            |
| C(15) | 10(1)           | 14(1)           | 12(1)           | 0(1)            | 2(1)            | 1(1)            |
| C(16) | 12(1)           | 13(1)           | 13(1)           | -1(1)           | 5(1)            | 0(1)            |
| C(17) | 13(1)           | 16(1)           | 13(1)           | 0(1)            | 4(1)            | 2(1)            |
| C(18) | 14(1)           | 20(1)           | 21(1)           | -5(1)           | 3(1)            | -3(1)           |
| C(19) | 19(1)           | 15(1)           | 28(1)           | -1(1)           | 9(1)            | -4(1)           |
| C(20) | 20(1)           | 16(1)           | 20(1)           | 3(1)            | 7(1)            | 1(1)            |
| C(21) | 15(1)           | 16(1)           | 15(1)           | -1(1)           | 3(1)            | 0(1)            |
| C(22) | 24(1)           | 31(1)           | 12(1)           | 0(1)            | 6(1)            | -4(1)           |
| C(23) | 15(1)           | 27(1)           | 15(1)           | 4(1)            | 3(1)            | -1(1)           |

|       |       |       |       |      |       |      |
|-------|-------|-------|-------|------|-------|------|
| C(24) | 12(1) | 17(1) | 12(1) | 0(1) | 5(1)  | 1(1) |
| C(25) | 20(1) | 27(1) | 20(1) | 4(1) | -4(1) | 5(1) |

---



Table 5. Hydrogen coordinates ( $\times 10^4$ ) and isotropic displacement parameters ( $\text{\AA}^2 \times 10^{-3}$ ) for 191240lt\_0m.

|       | x    | y    | z     | U(eq) |
|-------|------|------|-------|-------|
| H(1)  | 8066 | 1393 | -3387 | 24    |
| H(17) | 9310 | 1712 | -1252 | 21    |
| H(14) | 8228 | 2134 | 143   | 19    |
| H(18) | 4708 | 2504 | -829  | 17    |
| H(13) | 6106 | 2733 | 187   | 17    |
| H(5)  | 4349 | 2618 | 1311  | 16    |
| H(23) | 1775 | 1515 | 3447  | 21    |
| H(24) | 3279 | 1603 | 4415  | 21    |
| H(25) | 3831 | 573  | 4004  | 26    |
| H(4)  | 2411 | 482  | 2879  | 26    |
| H(27) | 1322 | 548  | 4497  | 31    |
| H(26) | 2336 | -37  | 4770  | 31    |
| H(28) | 3871 | -136 | 6760  | 44    |
| H(2)  | 4484 | 471  | 7640  | 44    |
| H(3)  | 4760 | 358  | 6275  | 44    |
| H(22) | 2499 | 2242 | -276  | 15    |
| H(6)  | 3334 | 1515 | -1397 | 15    |
| H(10) | 13   | -84  | -2197 | 22    |
| H(9)  | 871  | -794 | -459  | 24    |
| H(8)  | 2899 | -561 | 1185  | 22    |
| H(7)  | 4022 | 375  | 1111  | 19    |
| H(15) | 5742 | 1519 | -4138 | 27    |
| H(16) | 4658 | 1945 | -2746 | 23    |
| H(20) | 9036 | 1323 | 3149  | 37    |
| H(21) | 8436 | 704  | 3610  | 37    |
| H(19) | 8198 | 1385 | 4147  | 37    |
| H(11) | 5354 | 1057 | -208  | 80    |

## X-ray crystallographic data of compound 9a

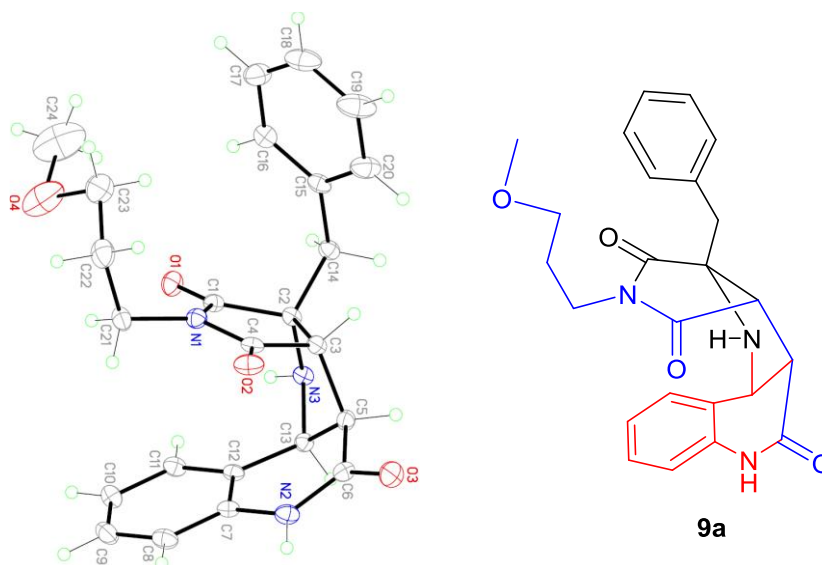

**ORTEP diagram of compound 9a.** Atomic displacement ellipsoids are drawn at the 50% probability level

CCDC No. 844607

Table 6. Crystal data and structure refinement for 110206lt\_0m.

|                                 |                                                               |                          |
|---------------------------------|---------------------------------------------------------------|--------------------------|
| Identification code             | 110206lt_0m                                                   |                          |
| Empirical formula               | C <sub>24</sub> H <sub>25</sub> N <sub>3</sub> O <sub>4</sub> |                          |
| Formula weight                  | 419.47                                                        |                          |
| Temperature                     | 100(2) K                                                      |                          |
| Wavelength                      | 0.71073 Å                                                     |                          |
| Crystal system                  | Triclinic                                                     |                          |
| Space group                     | P -1                                                          |                          |
| Unit cell dimensions            | a = 8.5285(2) Å                                               | $\alpha$ = 74.4790(10)°. |
|                                 | b = 10.0990(2) Å                                              | $\beta$ = 80.0180(10)°.  |
|                                 | c = 12.5940(3) Å                                              | $\gamma$ = 87.2130(10)°. |
| Volume                          | 1029.33(4) Å <sup>3</sup>                                     |                          |
| Z                               | 2                                                             |                          |
| Density (calculated)            | 1.353 Mg/m <sup>3</sup>                                       |                          |
| Absorption coefficient          | 0.093 mm <sup>-1</sup>                                        |                          |
| F(000)                          | 444                                                           |                          |
| Crystal size                    | 0.15 x 0.12 x 0.12 mm <sup>3</sup>                            |                          |
| Theta range for data collection | 1.70 to 26.40°.                                               |                          |

|                                   |                                             |
|-----------------------------------|---------------------------------------------|
| Index ranges                      | -10<=h<=10, -12<=k<=12, -15<=l<=15          |
| Reflections collected             | 17022                                       |
| Independent reflections           | 4203 [R(int) = 0.0280]                      |
| Completeness to theta = 26.40°    | 99.5 %                                      |
| Absorption correction             | Semi-empirical from equivalents             |
| Max. and min. transmission        | 0.9486 and 0.9067                           |
| Refinement method                 | Full-matrix least-squares on F <sup>2</sup> |
| Data / restraints / parameters    | 4203 / 67 / 298                             |
| Goodness-of-fit on F <sup>2</sup> | 1.047                                       |
| Final R indices [I>2sigma(I)]     | R1 = 0.0627, wR2 = 0.1758                   |
| R indices (all data)              | R1 = 0.0796, wR2 = 0.1978                   |
| Largest diff. peak and hole       | 1.820 and -0.469 e.Å <sup>-3</sup>          |

Table 7. Atomic coordinates ( $\times 10^4$ ) and equivalent isotropic displacement parameters ( $\text{\AA}^2 \times 10^3$ ) for 110206lt\_0m. U(eq) is defined as one third of the trace of the orthogonalized  $U^{ij}$  tensor.

|        | x        | y        | z        | U(eq) |
|--------|----------|----------|----------|-------|
| C(1)   | 1054(3)  | 1485(2)  | 3203(2)  | 14(1) |
| C(2)   | -90(3)   | 821(2)   | 2681(2)  | 13(1) |
| C(3)   | 816(3)   | 903(2)   | 1496(2)  | 14(1) |
| C(4)   | 2378(3)  | 1603(2)  | 1422(2)  | 15(1) |
| C(5)   | 994(3)   | -617(2)  | 1442(2)  | 15(1) |
| C(6)   | 2407(3)  | -899(2)  | 622(2)   | 16(1) |
| C(7)   | 3964(3)  | -1392(2) | 2142(2)  | 15(1) |
| C(8)   | 5495(3)  | -1431(2) | 2398(2)  | 20(1) |
| C(9)   | 5702(3)  | -1486(2) | 3476(2)  | 21(1) |
| C(10)  | 4387(3)  | -1483(3) | 4299(2)  | 21(1) |
| C(11)  | 2861(3)  | -1443(2) | 4042(2)  | 17(1) |
| C(12)  | 2631(3)  | -1403(2) | 2967(2)  | 14(1) |
| C(13)  | 979(3)   | -1403(2) | 2666(2)  | 14(1) |
| C(14)  | -1739(3) | 1512(2)  | 2753(2)  | 16(1) |
| C(15)  | -1738(3) | 3057(2)  | 2269(2)  | 17(1) |
| C(16)  | -1649(3) | 3944(3)  | 2933(2)  | 24(1) |
| C(17)  | -1682(3) | 5363(3)  | 2488(3)  | 32(1) |
| C(18)  | -1791(3) | 5905(3)  | 1379(3)  | 33(1) |
| C(19)  | -1868(4) | 5047(3)  | 712(2)   | 36(1) |
| C(20)  | -1853(3) | 3626(3)  | 1149(2)  | 27(1) |
| N(1)   | 2396(2)  | 1937(2)  | 2417(2)  | 16(1) |
| N(2)   | 3759(2)  | -1329(2) | 1043(2)  | 18(1) |
| O(1)   | 853(2)   | 1574(2)  | 4158(1)  | 19(1) |
| O(2)   | 3457(2)  | 1853(2)  | 631(1)   | 22(1) |
| O(3)   | 2322(2)  | -750(2)  | -365(1)  | 24(1) |
| N(3)   | -272(2)  | -656(2)  | 3226(2)  | 14(1) |
| C(21)  | 3790(30) | 2454(15) | 2760(16) | 19(1) |
| C(22)  | 3937(17) | 4012(14) | 2359(9)  | 26(1) |
| C(23)  | 2704(11) | 4713(9)  | 2977(8)  | 35(1) |
| O(4)   | 2920(9)  | 4298(7)  | 4173(6)  | 54(1) |
| C(24)  | 1436(13) | 4731(11) | 4687(9)  | 75(2) |
| C(21') | 3840(30) | 2502(12) | 2580(13) | 19(1) |
| C(22') | 4050(14) | 4030(11) | 2057(6)  | 26(1) |

|        |          |         |         |       |
|--------|----------|---------|---------|-------|
| C(23') | 2743(8)  | 4895(7) | 2464(6) | 35(1) |
| O(4')  | 2475(7)  | 4679(6) | 3638(6) | 54(1) |
| C(24') | 3791(11) | 4952(9) | 4166(7) | 75(2) |

---

Table 8. Bond lengths [ $\text{\AA}$ ] and angles [ $^\circ$ ] for 110206lt\_0m.

---

|              |          |
|--------------|----------|
| C(1)-O(1)    | 1.212(3) |
| C(1)-N(1)    | 1.383(3) |
| C(1)-C(2)    | 1.534(3) |
| C(2)-N(3)    | 1.470(3) |
| C(2)-C(14)   | 1.538(3) |
| C(2)-C(3)    | 1.540(3) |
| C(3)-C(4)    | 1.515(3) |
| C(3)-C(5)    | 1.554(3) |
| C(3)-H(3)    | 1.0000   |
| C(4)-O(2)    | 1.214(3) |
| C(4)-N(1)    | 1.384(3) |
| C(5)-C(6)    | 1.514(3) |
| C(5)-C(13)   | 1.531(3) |
| C(5)-H(5)    | 1.0000   |
| C(6)-O(3)    | 1.226(3) |
| C(6)-N(2)    | 1.357(3) |
| C(7)-C(8)    | 1.395(3) |
| C(7)-C(12)   | 1.400(3) |
| C(7)-N(2)    | 1.408(3) |
| C(8)-C(9)    | 1.386(4) |
| C(8)-H(8)    | 0.9500   |
| C(9)-C(10)   | 1.389(4) |
| C(9)-H(9)    | 0.9500   |
| C(10)-C(11)  | 1.390(3) |
| C(10)-H(10)  | 0.9500   |
| C(11)-C(12)  | 1.391(3) |
| C(11)-H(11)  | 0.9500   |
| C(12)-C(13)  | 1.521(3) |
| C(13)-N(3)   | 1.467(3) |
| C(13)-H(13)  | 1.0000   |
| C(14)-C(15)  | 1.516(3) |
| C(14)-H(14A) | 0.9900   |
| C(14)-H(14B) | 0.9900   |
| C(15)-C(16)  | 1.391(4) |
| C(15)-C(20)  | 1.392(3) |
| C(16)-C(17)  | 1.393(4) |

|               |           |
|---------------|-----------|
| C(16)-H(16)   | 0.9500    |
| C(17)-C(18)   | 1.375(4)  |
| C(17)-H(17)   | 0.9500    |
| C(18)-C(19)   | 1.369(4)  |
| C(18)-H(18)   | 0.9500    |
| C(19)-C(20)   | 1.393(4)  |
| C(19)-H(19)   | 0.9500    |
| C(20)-H(20)   | 0.9500    |
| N(1)-C(21')   | 1.45(2)   |
| N(1)-C(21)    | 1.50(3)   |
| N(2)-H(2)     | 0.8800    |
| N(3)-H(3A)    | 0.8922    |
| C(21)-C(22)   | 1.523(11) |
| C(21)-H(21A)  | 0.9900    |
| C(21)-H(21B)  | 0.9900    |
| C(22)-C(23)   | 1.466(11) |
| C(22)-H(22A)  | 0.9900    |
| C(22)-H(22B)  | 0.9900    |
| C(23)-O(4)    | 1.494(10) |
| C(23)-H(23A)  | 0.9900    |
| C(23)-H(23B)  | 0.9900    |
| O(4)-C(24)    | 1.423(11) |
| C(24)-H(24A)  | 0.9800    |
| C(24)-H(24B)  | 0.9800    |
| C(24)-H(24C)  | 0.9800    |
| C(21')-C(22') | 1.512(9)  |
| C(21')-H(21C) | 0.9900    |
| C(21')-H(21D) | 0.9900    |
| C(22')-C(23') | 1.488(9)  |
| C(22')-H(22C) | 0.9900    |
| C(22')-H(22D) | 0.9900    |
| C(23')-O(4')  | 1.415(8)  |
| C(23')-H(23C) | 0.9900    |
| C(23')-H(23D) | 0.9900    |
| O(4')-C(24')  | 1.472(11) |
| C(24')-H(24D) | 0.9800    |
| C(24')-H(24E) | 0.9800    |
| C(24')-H(24F) | 0.9800    |

|                  |            |
|------------------|------------|
| O(1)-C(1)-N(1)   | 124.6(2)   |
| O(1)-C(1)-C(2)   | 126.2(2)   |
| N(1)-C(1)-C(2)   | 109.15(18) |
| N(3)-C(2)-C(1)   | 111.24(17) |
| N(3)-C(2)-C(14)  | 109.12(17) |
| C(1)-C(2)-C(14)  | 111.45(18) |
| N(3)-C(2)-C(3)   | 104.89(17) |
| C(1)-C(2)-C(3)   | 103.73(17) |
| C(14)-C(2)-C(3)  | 116.17(18) |
| C(4)-C(3)-C(2)   | 105.29(17) |
| C(4)-C(3)-C(5)   | 114.17(18) |
| C(2)-C(3)-C(5)   | 104.47(17) |
| C(4)-C(3)-H(3)   | 110.9      |
| C(2)-C(3)-H(3)   | 110.9      |
| C(5)-C(3)-H(3)   | 110.9      |
| O(2)-C(4)-N(1)   | 124.1(2)   |
| O(2)-C(4)-C(3)   | 126.9(2)   |
| N(1)-C(4)-C(3)   | 109.00(19) |
| C(6)-C(5)-C(13)  | 115.59(19) |
| C(6)-C(5)-C(3)   | 114.78(18) |
| C(13)-C(5)-C(3)  | 102.86(17) |
| C(6)-C(5)-H(5)   | 107.7      |
| C(13)-C(5)-H(5)  | 107.7      |
| C(3)-C(5)-H(5)   | 107.7      |
| O(3)-C(6)-N(2)   | 122.2(2)   |
| O(3)-C(6)-C(5)   | 121.5(2)   |
| N(2)-C(6)-C(5)   | 116.24(19) |
| C(8)-C(7)-C(12)  | 120.4(2)   |
| C(8)-C(7)-N(2)   | 119.8(2)   |
| C(12)-C(7)-N(2)  | 119.9(2)   |
| C(9)-C(8)-C(7)   | 120.0(2)   |
| C(9)-C(8)-H(8)   | 120.0      |
| C(7)-C(8)-H(8)   | 120.0      |
| C(8)-C(9)-C(10)  | 120.1(2)   |
| C(8)-C(9)-H(9)   | 120.0      |
| C(10)-C(9)-H(9)  | 120.0      |
| C(9)-C(10)-C(11) | 119.9(2)   |



|                     |            |
|---------------------|------------|
| C(9)-C(10)-H(10)    | 120.1      |
| C(11)-C(10)-H(10)   | 120.1      |
| C(10)-C(11)-C(12)   | 120.8(2)   |
| C(10)-C(11)-H(11)   | 119.6      |
| C(12)-C(11)-H(11)   | 119.6      |
| C(11)-C(12)-C(7)    | 118.9(2)   |
| C(11)-C(12)-C(13)   | 122.2(2)   |
| C(7)-C(12)-C(13)    | 118.9(2)   |
| N(3)-C(13)-C(12)    | 116.74(18) |
| N(3)-C(13)-C(5)     | 100.74(17) |
| C(12)-C(13)-C(5)    | 110.29(18) |
| N(3)-C(13)-H(13)    | 109.6      |
| C(12)-C(13)-H(13)   | 109.6      |
| C(5)-C(13)-H(13)    | 109.6      |
| C(15)-C(14)-C(2)    | 115.34(19) |
| C(15)-C(14)-H(14A)  | 108.4      |
| C(2)-C(14)-H(14A)   | 108.4      |
| C(15)-C(14)-H(14B)  | 108.4      |
| C(2)-C(14)-H(14B)   | 108.4      |
| H(14A)-C(14)-H(14B) | 107.5      |
| C(16)-C(15)-C(20)   | 118.2(2)   |
| C(16)-C(15)-C(14)   | 121.1(2)   |
| C(20)-C(15)-C(14)   | 120.7(2)   |
| C(15)-C(16)-C(17)   | 120.8(3)   |
| C(15)-C(16)-H(16)   | 119.6      |
| C(17)-C(16)-H(16)   | 119.6      |
| C(18)-C(17)-C(16)   | 120.1(3)   |
| C(18)-C(17)-H(17)   | 119.9      |
| C(16)-C(17)-H(17)   | 119.9      |
| C(19)-C(18)-C(17)   | 119.9(3)   |
| C(19)-C(18)-H(18)   | 120.1      |
| C(17)-C(18)-H(18)   | 120.1      |
| C(18)-C(19)-C(20)   | 120.6(3)   |
| C(18)-C(19)-H(19)   | 119.7      |
| C(20)-C(19)-H(19)   | 119.7      |
| C(15)-C(20)-C(19)   | 120.4(3)   |
| C(15)-C(20)-H(20)   | 119.8      |
| C(19)-C(20)-H(20)   | 119.8      |

|                      |            |
|----------------------|------------|
| C(1)-N(1)-C(4)       | 112.73(19) |
| C(1)-N(1)-C(21')     | 127.8(7)   |
| C(4)-N(1)-C(21')     | 118.8(7)   |
| C(1)-N(1)-C(21)      | 119.7(8)   |
| C(4)-N(1)-C(21)      | 126.4(8)   |
| C(21')-N(1)-C(21)    | 8.2(13)    |
| C(6)-N(2)-C(7)       | 124.3(2)   |
| C(6)-N(2)-H(2)       | 117.8      |
| C(7)-N(2)-H(2)       | 117.8      |
| C(13)-N(3)-C(2)      | 108.73(17) |
| C(13)-N(3)-H(3A)     | 110.4      |
| C(2)-N(3)-H(3A)      | 111.7      |
| N(1)-C(21)-C(22)     | 112.1(16)  |
| N(1)-C(21)-H(21A)    | 109.2      |
| C(22)-C(21)-H(21A)   | 109.2      |
| N(1)-C(21)-H(21B)    | 109.2      |
| C(22)-C(21)-H(21B)   | 109.2      |
| H(21A)-C(21)-H(21B)  | 107.9      |
| C(23)-C(22)-C(21)    | 112.6(12)  |
| C(23)-C(22)-H(22A)   | 109.1      |
| C(21)-C(22)-H(22A)   | 109.1      |
| C(23)-C(22)-H(22B)   | 109.1      |
| C(21)-C(22)-H(22B)   | 109.1      |
| H(22A)-C(22)-H(22B)  | 107.8      |
| C(22)-C(23)-O(4)     | 107.5(7)   |
| C(22)-C(23)-H(23A)   | 110.2      |
| O(4)-C(23)-H(23A)    | 110.2      |
| C(22)-C(23)-H(23B)   | 110.2      |
| O(4)-C(23)-H(23B)    | 110.2      |
| H(23A)-C(23)-H(23B)  | 108.5      |
| C(24)-O(4)-C(23)     | 100.3(8)   |
| N(1)-C(21')-C(22')   | 114.5(13)  |
| N(1)-C(21')-H(21C)   | 108.6      |
| C(22')-C(21')-H(21C) | 108.6      |
| N(1)-C(21')-H(21D)   | 108.6      |
| C(22')-C(21')-H(21D) | 108.6      |
| H(21C)-C(21')-H(21D) | 107.6      |
| C(23')-C(22')-C(21') | 114.6(10)  |

|                      |          |
|----------------------|----------|
| C(23')-C(22')-H(22C) | 108.6    |
| C(21')-C(22')-H(22C) | 108.6    |
| C(23')-C(22')-H(22D) | 108.6    |
| C(21')-C(22')-H(22D) | 108.6    |
| H(22C)-C(22')-H(22D) | 107.6    |
| O(4')-C(23')-C(22')  | 113.3(6) |
| O(4')-C(23')-H(23C)  | 108.9    |
| C(22')-C(23')-H(23C) | 108.9    |
| O(4')-C(23')-H(23D)  | 108.9    |
| C(22')-C(23')-H(23D) | 108.9    |
| H(23C)-C(23')-H(23D) | 107.7    |
| C(23')-O(4')-C(24')  | 118.2(6) |
| O(4')-C(24')-H(24D)  | 109.5    |
| O(4')-C(24')-H(24E)  | 109.5    |
| H(24D)-C(24')-H(24E) | 109.5    |
| O(4')-C(24')-H(24F)  | 109.5    |
| H(24D)-C(24')-H(24F) | 109.5    |
| H(24E)-C(24')-H(24F) | 109.5    |

---

Symmetry transformations used to generate equivalent atoms:

Table 9. Anisotropic displacement parameters ( $\text{\AA}^2 \times 10^3$ ) for 110206lt\_0m. The anisotropic displacement factor exponent takes the form:  $-2\pi^2 [ h^2 a^{*2} U^{11} + \dots + 2 h k a^* b^* U^{12} ]$

|        | $U^{11}$ | $U^{22}$ | $U^{33}$ | $U^{23}$ | $U^{13}$ | $U^{12}$ |
|--------|----------|----------|----------|----------|----------|----------|
| C(1)   | 16(1)    | 12(1)    | 15(1)    | -3(1)    | -3(1)    | 2(1)     |
| C(2)   | 12(1)    | 14(1)    | 11(1)    | -2(1)    | -1(1)    | 1(1)     |
| C(3)   | 14(1)    | 16(1)    | 12(1)    | -4(1)    | -2(1)    | 3(1)     |
| C(4)   | 15(1)    | 11(1)    | 16(1)    | -1(1)    | -1(1)    | 4(1)     |
| C(5)   | 15(1)    | 16(1)    | 14(1)    | -6(1)    | -3(1)    | 0(1)     |
| C(6)   | 19(1)    | 14(1)    | 15(1)    | -4(1)    | -1(1)    | 0(1)     |
| C(7)   | 17(1)    | 11(1)    | 17(1)    | -3(1)    | -2(1)    | 3(1)     |
| C(8)   | 15(1)    | 17(1)    | 23(1)    | -4(1)    | 1(1)     | 2(1)     |
| C(9)   | 15(1)    | 20(1)    | 28(1)    | -3(1)    | -7(1)    | 2(1)     |
| C(10)  | 21(1)    | 21(1)    | 21(1)    | -5(1)    | -9(1)    | 4(1)     |
| C(11)  | 16(1)    | 17(1)    | 17(1)    | -4(1)    | -1(1)    | 3(1)     |
| C(12)  | 14(1)    | 10(1)    | 16(1)    | -1(1)    | -1(1)    | 1(1)     |
| C(13)  | 13(1)    | 14(1)    | 15(1)    | -4(1)    | -2(1)    | 0(1)     |
| C(14)  | 14(1)    | 18(1)    | 14(1)    | -4(1)    | -1(1)    | 2(1)     |
| C(15)  | 11(1)    | 19(1)    | 20(1)    | -4(1)    | 0(1)     | 3(1)     |
| C(16)  | 25(1)    | 22(1)    | 29(1)    | -8(1)    | -11(1)   | 5(1)     |
| C(17)  | 29(2)    | 20(1)    | 51(2)    | -14(1)   | -12(1)   | 4(1)     |
| C(18)  | 30(2)    | 17(1)    | 43(2)    | 2(1)     | 2(1)     | 4(1)     |
| C(19)  | 46(2)    | 27(2)    | 24(1)    | 4(1)     | 3(1)     | 14(1)    |
| C(20)  | 36(2)    | 25(1)    | 20(1)    | -7(1)    | -3(1)    | 11(1)    |
| N(1)   | 15(1)    | 14(1)    | 17(1)    | -4(1)    | -2(1)    | -1(1)    |
| N(2)   | 18(1)    | 19(1)    | 15(1)    | -5(1)    | 2(1)     | 4(1)     |
| O(1)   | 23(1)    | 22(1)    | 13(1)    | -4(1)    | -4(1)    | -1(1)    |
| O(2)   | 20(1)    | 18(1)    | 22(1)    | -3(1)    | 7(1)     | 2(1)     |
| O(3)   | 27(1)    | 30(1)    | 15(1)    | -10(1)   | -3(1)    | 4(1)     |
| N(3)   | 14(1)    | 15(1)    | 12(1)    | -2(1)    | -1(1)    | 1(1)     |
| C(21)  | 16(2)    | 20(1)    | 20(4)    | -3(2)    | -6(3)    | -1(1)    |
| C(22)  | 26(2)    | 24(1)    | 29(4)    | -2(2)    | -8(3)    | -7(1)    |
| C(23)  | 34(2)    | 30(2)    | 44(3)    | -11(3)   | -9(3)    | -2(2)    |
| O(4)   | 57(2)    | 41(2)    | 64(3)    | -26(2)   | 10(2)    | -11(2)   |
| C(24)  | 89(3)    | 54(3)    | 75(3)    | -26(2)   | 17(3)    | -4(2)    |
| C(21') | 16(2)    | 20(1)    | 20(4)    | -3(2)    | -6(3)    | -1(1)    |
| C(22') | 26(2)    | 24(1)    | 29(4)    | -2(2)    | -8(3)    | -7(1)    |

|        |       |       |       |        |       |        |
|--------|-------|-------|-------|--------|-------|--------|
| C(23') | 34(2) | 30(2) | 44(3) | -11(3) | -9(3) | -2(2)  |
| O(4')  | 57(2) | 41(2) | 64(3) | -26(2) | 10(2) | -11(2) |
| C(24') | 89(3) | 54(3) | 75(3) | -26(2) | 17(3) | -4(2)  |

---

Table 10. Hydrogen coordinates ( $\times 10^4$ ) and isotropic displacement parameters ( $\text{\AA}^2 \times 10^{-3}$ ) for 110206lt\_0m.

|        | x     | y     | z    | U(eq) |
|--------|-------|-------|------|-------|
| H(3)   | 199   | 1446  | 917  | 17    |
| H(5)   | 9     | -872  | 1213 | 18    |
| H(8)   | 6396  | -1420 | 1834 | 24    |
| H(9)   | 6745  | -1525 | 3653 | 25    |
| H(10)  | 4529  | -1508 | 5036 | 25    |
| H(11)  | 1965  | -1443 | 4607 | 21    |
| H(13)  | 631   | -2371 | 2787 | 17    |
| H(14A) | -2407 | 1096  | 2359 | 19    |
| H(14B) | -2245 | 1303  | 3549 | 19    |
| H(16)  | -1565 | 3578  | 3698 | 29    |
| H(17)  | -1628 | 5957  | 2951 | 38    |
| H(18)  | -1814 | 6873  | 1076 | 39    |
| H(19)  | -1931 | 5425  | -56  | 43    |
| H(20)  | -1923 | 3042  | 680  | 33    |
| H(2)   | 4562  | -1586 | 601  | 21    |
| H(3A)  | -225  | -845  | 3954 | 17    |
| H(21A) | 4781  | 2034  | 2448 | 22    |
| H(21B) | 3687  | 2166  | 3585 | 22    |
| H(22A) | 4997  | 4286  | 2445 | 32    |
| H(22B) | 3858  | 4312  | 1555 | 32    |
| H(23A) | 1633  | 4443  | 2907 | 42    |
| H(23B) | 2810  | 5721  | 2674 | 42    |
| H(24A) | 1102  | 5590  | 4201 | 112   |
| H(24B) | 1551  | 4879  | 5407 | 112   |
| H(24C) | 632   | 4021  | 4806 | 112   |
| H(21C) | 4768  | 2017  | 2263 | 22    |
| H(21D) | 3845  | 2316  | 3393 | 22    |
| H(22C) | 5065  | 4317  | 2207 | 32    |
| H(22D) | 4134  | 4207  | 1238 | 32    |
| H(23C) | 3006  | 5874  | 2106 | 42    |
| H(23D) | 1750  | 4695  | 2230 | 42    |
| H(24D) | 4676  | 4322  | 4047 | 112   |

|        |      |      |      |     |
|--------|------|------|------|-----|
| H(24E) | 3424 | 4812 | 4970 | 112 |
| H(24F) | 4151 | 5902 | 3833 | 112 |

---
